# Supplementary material for: Comparative diagnostic accuracy of multiparametric magnetic resonance imaging-ultrasound fusion-guided biopsy versus systematic biopsy for clinically significant prostate cancer
Source: PeerJ. 2023 Dec 14;11:e16614. doi: 10.7717/peerj.16614 (PMC10725670; doi:10.7717/peerj.16614)
Supplement: Supplemental Information 1 [file peerj-11-16614-s001.xls]

## Sheet: Sheet1
No	Age	Puncture Method (Systematic Biopsy Vs MRI/US Fusion Biopsy)	MR												Pathology
1	81	SB	BPH												Gleason， 4+3=7
2	63	SB	BPH												Gleason，4+4=8
3	65	SB	BPH												BPH
4	75	SB	BPH												BPH
5	77	FB	Enlargement of the prostate gland with indications of hyperplasia, suspicious nodular shadow detected in the left peripheral zone, please combine with other examinations												Gleason 3+4=7
6	57	FB	Nodular shadow detected in the left peripheral zone of the prostate gland, further examination is recommended												BPH
7	56	FB	BPH												BPH
8	59	FB	Pca												Gleason score 4+4=8
9	67	SB	BPH												BPH
10	60	FB	"Abnormal signal detected in the left side of the prostate gland, suggestive of a space-occupying lesion, please combine with clinical information and consider biopsy examination。												BPH
11	70	SB	None												BPH
12	71	FB	Abnormal signal lesion detected at the junction of the inner and outer gland of the left prostate, suggestive of a possible tumor.												BPH
13	74	FB	Abnormal signal lesions detected in both sides of the peripheral zone of the prostate gland, with a high possibility of tumor."												Gleason score 4+5=9
14	71	FB	Local short T2 signal is found in the anterior margin of the right peripheral zone, which is enhanced and no obvious high signal abnormality is seen on the diffusion scan.												BPH
15	64	FB	he peripheral zone of the right lobe of the prostate contains a highly vascularized nodule, which requires further investigation to exclude prostate cancer.												Gleason score 4+3=7
16	76	SB	BPH												Gleason score3+3=6
17	73	FB	BPH												BPH
18	54	FB	A local short T2 signal is detected in the posterior peripheral zone of the left lobe of the prostate.												BPH
19	74	FB	Abnormal signals are detected in the prostate. Combined with medical history, it is possible that the prostate cancer has spread to the bilateral seminal vesicles and bladder.												Gleason score 4+4=8
20	63	SB	BPH。												BPH
21	72	SB	None												Gleason score 3+3=6
22	71	SB	None												无
23	78	FB	BPH												BPH
24	61	FB	Abnormal signal shadow detected in the peripheral zone of the right lobe of the prostate.												BPH
25	79	FB	BPH												Gleason score4+5=9
26	81	FB	Pca												BPH
27	62	FB	Abnormal signal focus detected in the upper posterior part of the central gland, which may be indicative of a tumorous lesion.												BPH
28	67	SB	None												Gleason score4+5=9
29	68	SB	None												BPH
30	73	FB	Abnormal signals in the upper prostate, possible prostate Ca												Gleason score4+3=7
31	71	SB	BPH												BPH
32	63	SB	BPH												Gleason score3+3=6
33	79	SB	None												Gleason score 5+5=10
34	67	SB	None												BPH
35	66	SB	BPH												BPH
36	66	SB	None												BPH
37	62	SB	None												BPH
38	71	SB	None												BPH
39	65	SB	None												BPH
40	69	SB	BPH												BPH
41	69	SB	None												BPH
42	60	SB	None												Gleason score3+3=6
43	56	FB	An abnormal signal focus is detected in the peripheral zone of the right lobe of the prostate, which requires further investigation to exclude a tumorous lesion. It is recommended to undergo a biopsy for diagnosis.												Gleason score3+3=6
44	62	SB	BPH												BPH
45	71	SB	None												BPH
46	82	FB	Abnormal signal detected in the right side of the central gland of the prostate												BPH
47	71	FB	Abnormalities are detected in the right peripheral zone of the central gland of the prostate, indicating a high possibility of prostate cancer												Gleason score3+3=6
48	83	FB	Abnormal signal detected in the right peripheral zone of the prostate, indicating a possibility of prostate cancer.												Gleason score 3+3=6
49	81	FB	BPH												Gleason score 3+3=6
50	63	FB	Nodular abnormal signal is detected in the left peripheral zone of the prostate, suggesting a high possibility of tumorous lesion.												Gleason score4+3=7
51	69	SB	None												Gleason score 5+4=9
52	83	SB	None												BPH
53	76	FB	Abnormal signal focus detected in the peripheral zone of the prostate, indicating the possibility of a tumorous lesion with bleeding.												Gleason score 4+4=8
54	81	FB	Abnormal signal detected in the bilateral peripheral zone and right central zone of the prostate, suggesting the possibility of prostate cancer.												Gleason score 4+4=8
55	72	SB	None												BPH
56	78	SB	None												BPH
57	87	SB	None												Gleason score 4+5=9
58	51	FB	Abnormal signal focus detected in the anterior margin of the right side of the central gland of the prostate, indicating the possibility of tumorous lesion.												BPH
59	74	SB	None												Gleasonscore 3+3=6
60	73	SB	BPH												Gleason score 5+3=8
61	65	FB	Enhanced nodular abnormality detected in the left side of the central zone of the prostate, further examination is needed to determine if it is tumorous or not.												BPH
62	63	FB	Small T2WI slice of slightly low signal in the left peripheral zone of the prostate.												Gleason score 3+3=6
63	63	SB	None												BPH
64	79	SB	BPH												BPH
65	85	SB	None												Gleason score 3+4=7
66	75	SB	BPH												BPH
67	82	SB	None												BPH
68	67	SB	None												Gleason score 3+4=7
69	67	SB	None												BPH
70	83	FB	BPH												BPH
71	63	SB	None												BPH
72	63	SB	None												BPH
73	78	FB	Abnormal signal foci on the right side of the prostate, tumorigenic lesions to be excluded.												Gleason score 3+4=7
74	64	FB	Suspicious enhancement detected in the left peripheral zone of the prostate.												BPH
75	59	SB	BPH												BPH
76	85	FB	inear enhancement detected in the peripheral zone of the prostate with predominant involvement on the left side.												Gleason score 5+3=8
77	60	FB	Abnormal signal focus detected in the left peripheral zone of the prostate, further examination is needed to determine if it is a tumorous lesion or not												BPH
78	73	SB	Pca												Gleason score 5+4=9
79	82	SB	None												BPH
80	70	FB	Nodular abnormal signal detected on the right side of the central gland of the prostate, with suspicion of cancer. It is recommended to perform biopsy through puncture												Gleason score 4+3=7
81	71	SB	None												BPH
82	60	SB	BPH												BPH
83	70	SB	BPH												Gleason score 4+4=8
84	80	FB	Suspicious abnormal signal detected in the right peripheral zone, it is recommended to perform biopsy through puncture.												BPH
85	64	SB	BPH												Gleason score 5+4=9
86	82	FB	Abnormal signal detected in the left peripheral zone, with a high possibility of cancerous transformation.												Gleason score 5+4=9
87	68	SB	BPH												BPH
88	71	SB	BPH												BPH
89	66	SB	BPH												BPH
90	71	FB	Suspicious abnormal signal detected in the right peripheral zone of the prostate												BPH
91	61	SB	BPH												Gleason score 3+3=6
92	86	FB	Abnormal signal focus detected in the right peripheral zone of the prostate, with suspicion of malignant tumorous lesion.												Gleason score 5+4=9
93	62	SB	None												BPH
94	76	FB	Small nodular shadow detected in the right peripheral zone of the prostate.												Gleason score 3+3=6
95	66	SB	None												BPH
96	59	SB	BPH												无
97	66	SB	None												Gleason score 3+3=6
98	62	FB	BPH												Gleason score 3+3=6
99	74	FB	BPH												BPH
100	58	SB	None												BPH
101	67	FB	Abnormal signal detected in the right peripheral zone near the midline of the prostate, with a possibility of occupying lesion.												BPH
102	59	SB	None												BPH
103	89	SB	None												BPH
104	85	SB	None												Gleason score 5+4=9
105	82	FB	Suspicious nodular shadow detected in the left peripheral zone of the prostate, with a possibility of tumor.												Gleason score 4+3=7
106	76	FB	Abnormal enhanced focus detected at the junction between the central gland and peripheral zone on the right, with a preliminary diagnosis of occupying lesion.												Gleason score 4+3=7
107	56	FB	BPH												BPH
108	73	FB	Nodular lesion detected in the left peripheral zone, with suspicion of prostate cancer.												Gleason score 4+3=7
109	78	SB	None												BPH
110	79	SB	None												Gleason score 3+3=6
111	76	FB	Nodular low signal detected in the right peripheral lobe of the prostate, with a possibility of tumorous lesion.												BPH
112	87	FB	Abnormal signal focus detected in the right peripheral zone of the prostate, needle biopsy may be necessary.												Gleason score 3+4=7
113	75	FB	Suspicious abnormal signal detected in the lower part of the right peripheral zone with obvious enhancement in that area, please combine with clinical and needle biopsy findings.												Gleason score 3+3=6
114	77	FB	Abnormal signal detected with significant uneven enhancement in the left peripheral zone and anterior part of the central gland of the prostate, cancer is suspected and needs further evaluation.												Gleason score 4+3=7
115	81	FB	BPH												BPH
116	62	SB	BPH												BPH
117	61	SB	None												BPH
118	79	FB	Occupying lesion detected in the left peripheral zone of the prostate, with high possibility of prostate cancer and consideration of invasion into the left seminal vesicle.												BPH
119	62	SB	None												BPH
120	82	FB	BPH												Gleason score 3+4=7
121	82	SB	None												BPH
122	63	FB	Slightly decreased T2 signal change with enhancement detected in the left peripheral zone of the prostate, please consider the clinical PSA examination and suggested needle biopsy.												BPH
123	72	FB	Abnormal signal focus detected in the right peripheral zone of the prostate, considering the possibility of prostate cancer, needle biopsy is recommended.												BPH
124	78	SB	None												BPH
125	67	FB	BPH												BPH
126	73	SB	None												BPH
127	61	FB	Nodular shadow detected in the right periprostatic area, prostate cancer is possible, please combine with clinical findings.												Gleason score 3+3=6
128	61	FB	BPH												Gleason score 3+3=6
129	58	SB	BPH												BPH
130	62	SB	BPH												BPH
131	73	SB	Nodular lesion detected in the left posterior lobe of the prostate. Irregular signal found in the right lobe of the prostate.												Gleason score 3+3=6
132	86	FB	Prostate enlargement is significant on the right side, with nodular shadow seen at the posterior margin. Further evaluation is needed to rule out any occupying lesion. Abnormal signal detected in the peripheral zone.												Gleason score 3+3=6
133	83	FB	Prostate cancer is suspected in the left peripheral zone of the prostate, with associated left pelvic sidewall lymph node metastasis. Please combine with relevant examinations.												Gleason score 4+3=7
134	71	FB	Abnormal signal nodular lesion detected in the right lobe of the central gland, occupying lesion needs to be ruled out. Suspected involvement of the local bladder wall, needle biopsy is recommended.												BPH
135	56	SB	None												BPH
136	76	SB	BPH												BPH
137	70	SB	Abnormally enhanced nodular lesion detected in the right anterior portion of the prostate central gland.												BPH
138	77	FB	Nodular abnormal signal detected on the left side of the upper part of the prostate, suggestive of prostate cancer.												Gleason score 3+4=7
139	60	FB	Abnormal enhancement detected in the left peripheral zone of the prostate, pending further evaluation for possible cancer.												BPH
140	71	SB	BPH												BPH
141	55	FB	Nodule detected at the junction of the two lateral lobes at the posterior region of the prostate, needle biopsy is recommended.												BPH
142	65	FB	Bleeding detected in the left posterior lobe of the prostate, with possible occupying lesion not excluded.												Gleason score 3+3=6
143	71	SB	None												BPH
144	45	SB	BPH												BPH
145	61	SB	Uneven signal detected in the peripheral zone of the prostate, with slightly shorter T2 signal changes observed on the left side, suggesting possible prostate cancer that needs further evaluation.。												BPH
146	82	SB	None												BPH
147	57	FB	Abnormal signal detected in the anterior lower portion of the left lobe of the prostate peripheral zone, suggesting a high possibility of prostate cancer.												BPH
148	63	SB	None												BPH
149	73	FB	Abnormal signal focus detected in the left peripheral zone of the prostate, with a high possibility of neoplastic lesion.												Gleason score 4+5=9
150	60	SB	None												BPH
151	66	SB	BPH												BPH
152	60	SB	None												BPH
153	74	FB	Slightly shorter T2 signal detected in the local area of the left peripheral zone of the prostate, with no abnormal enhancement observed on contrast-enhanced scan												BPH
154	68	FB	BPH												BPH
155	68	SB	BPH												BPH
156	68	SB	None												BPH
157	75	SB	None												BPH
158	64	SB	None												BPH
159	64	SB	None												BPH
160	84	FB	Abnormal signal focus detected in the left peripheral zone, suggesting a possibility of neoplastic lesion.												Gleason score 3+3=6
161	63	FB	Decreased T2 signal detected in the left peripheral zone of the prostate, it is recommended to perform biopsy if necessary.												BPH
162	65	SB	None												BPH
163	61	SB	None												BPH
164	71	SB	None												BPH
165	51	FB	Local abnormal enhancement detected in the right peripheral and transition zones of the prostate, with the possibility of neoplastic lesion not excluded.												Gleason score 3+3=6
166	64	FB	Abnormal signal focus detected in the right peripheral zone of the prostate, with the possibility of neoplastic lesion not excluded. Biopsy is recommended.												Gleason score 5+3=8
167	86	FB	Multiple abnormal signals detected in the central gland and right peripheral zone of the prostate												Gleason score 3+3=6
168	66	SB	None												Gleason score 4+4=8
169	83	SB	None												BPH
170	65	SB	None												Gleason score 3+3=6
171	65	SB	None												同上
172	78	SB	None												BPH
173	73	SB	None												BPH
174	78	SB	None												Gleason score 4+3=7
175	75	FB	There is a short T2 signal in the left peripheral zone of the prostate, and it is recommended to follow up												BPH
176	65	SB	BPH												BPH
177	75	SB	None												BPH
178	78	SB	None												BPH
179	68	FB	There is a small nodular lesion in the left peripheral zone of the prostate, and a slightly higher signal in a small diffused area in the right posterior peripheral zone, which may indicate a mass. Further evaluation is needed to rule out the possibility of a tumorous growth.												BPH
180	73	SB	BPH												BPH
181	63	FB	BPH												BPH
182	71	SB	None												BPH
183	70	SB	There is a clearly-enhanced lesion in a patchy area on the right posterior peripheral zone of the prostate, which may indicate inflammation. Howeve.												Gleason score 3+3=6
184	77	SB	None												BPH
185	79	FB	There is abnormal enhancement in the posterior and left peripheral zone of the prostate, which may indicate the presence of cancer.												Gleason score 4+3=7
186	65	FB	There is an enhanced lesion in the right anterior peripheral zone of the prostate.												BPH
187	91	FB	There is an abnormal signal in the right anterior portion of the central gland of the prostate, which may indicate the presence of cancer												BPH
188	67	SB	BPH												BPH
189	67	SB	None												BPH
190	68	SB	BPH												BPH
191	69	FB	There is an abnormal signal in the nodular area of the right peripheral zone of the prostate, which is consistent with prostate cancer												Gleason score 4+3=7
192	65	SB	BPH												BPH
193	63	SB	None												BPH
194	61	SB	None												Gleason score 4+4=8
195	66	SB	None												Gleason score 3+4=7
196	56	FB	There are abnormal signal foci in both peripheral zones of the prostate.												Gleason score 3+3=6
197	65	FB	"There is an enhanced small nodular lesion in the peripheral zone of the prostate, which may indicate the presence of a tumor.												Gleason score 4+3=7
198	88	FB	T2WI hyposignal in the right peripheral zone of the prostate.												BPH
199	85	FB	There is a localized high signal area on the DWI sequence in the anterior part of the prostate on the right, which needs to be further evaluated to rule out cancer."												BPH
200	76	FB	"There are abnormal signal shadows in the central gland and left peripheral zone of the prostate, suggesting possible prostate cancer that has invaded both sides of the seminal vesicles. Further evaluation based on clinical findings and other tests is needed."												Gleason score 4+3=7
201	62	SB	None												BPH
202	64	SB	BPH												BPH
203	79	FB	There is a small enhanced nodular shadow in the left rear peripheral zone of the prostate.												Gleason score 3+3=6
204	62	SB	BPH												BPH
205	68	FB	BPH												BPH
206	79	SB	None												BPH
207	78	SB	None												BPH
208	78	SB	None												同上
209	77	FB	There is a nodule in the left lateral lobe of the prostate, and the possibility of mass lesion is considered.												BPH
210	65	FB	PCa												Gleason score 4+4=8
211	65	SB	here is a nodular abnormal enhancement in the posterior left peripheral zone of the prostate, which suggests a potential tumor												Gleason score 3+3=6
212	59	SB	BPH												BPH
213	60	SB	"There is a local abnormal signal in the peripheral zone of the prostate. Considering the clinical information, further evaluation with needle biopsy is recommended												BPH
214	55	SB	BPH												BPH
215	55	FB	"There are signal lesions in the prostate, indicating possible invasion of the seminal vesicle and posterior bladder wall by prostate cancer, with consideration of pelvic lymph node metastasis."												Gleason score5+4=9
216	80	FB	There are abnormal signal lesions within the left peripheral zone of the prostate, with a primary consideration for tumor-related pathological changes.												Gleason score5+4=9
217	76	FB	Abnormal signal focus in the left posterior peripheral zone of the prostate, suggestive of tumor lesion.												BPH
218	65	FB	A nodular abnormal enhancement is present in the left central zone of the prostate, with further evaluation needed to rule out the presence of a tumor												BPH
219	72	SB	None												Gleason score 3+3=6
220	61	SB	Abnormal enhancement lesion in the anterior lower part of the left peripheral zone of the prostate, suggestive of a proliferative nodule.												BPH
221	81	FB	here is a slightly shortened T2 signal shadow in the right peripheral zone of the prostate, which shows a nodular enhancement pattern on the enhanced scan. This suggests the possibility of prostate cancer. Additionally, there are locally spotted short T1 high signals in the prostate on T1-weighted imaging.												Gleason score 4+3=7
222	82	FB	Small nodular density in the peripheral zone of the prostate, possibility of tumor to be ruled out.。												Gleason score 4+3=7
223	61	SB	There is an abnormal signal in the left peripheral zone of the prostate.												BPH
224	69	SB	BPH												Gleason score 4+3=7
225	79	SB	None												Gleason score 3+3=6
226	63	SB	BPH												BPH
227	55	SB	BPH												BPH
228	66	SB	BPH												BPH
229	72	SB	DWI sequence of the prostate shows a small area of high signal in the right anterior part of the central gland.												BPH
230	54	FB	The signal in the left peripheral zone of the prostate is uneven, further analysis is necessary in combination with clinical information												None
231	83	FB	Nodular lesion in the peripheral zone of the left prostate gland, which is suspicious for possible prostate cancer.												Gleason score 4+4=8
232	50	FB	A non-enhancing nodule lesion in the right peripheral zone of the prostate, with uncertain nature. Further analysis is necessary based on PSA values, and biopsy may be needed if necessary."												None
233	68	SB	"There is a nodular abnormal signal in the right portion of the central gland of the prostate.												BPH
234	64	SB	None												BPH
235	61	SB	BPH												BPH
236	80	FB	The left peripheral zone of the prostate shows uneven signal intensity, with nodular enhancement evident after contrast administration.												Gleason score 3+4=7
237	71	SB	None												BPH
238	75	SB	None												Gleason score 4+5=9
239	60	FB	Foci of suspicious abnormal signal nodules in the right peripheral zone of the prostate.												BPH
240	52	SB	None												BPH
241	67	SB	BPH												BPH
242	94	FB	Suspicious abnormal signals in the left peripheral zone of the prostate, puncture biopsy if necessary.												Gleason score 4+3=7
243	65	SB	BPH												BPH
244	70	SB	Prostate nodular hyperplasia, recommended for re-examination. Abnormal signal with patchy bleeding may be present in the left posterior peripheral zone.												BPH
245	62	FB	There is a nodular enhancing lesion at the lower margin of the right peripheral zone of the prostate. Clinical correlation is recommended, and further biopsy may be necessary.												Gleason score 3+4=7
246	70	FB	Low signal nodule present in the left peripheral zone of the prostate gland, possibility of tumor, biopsy is recommended.												BPH
247	64	SB	A slightly low signal nodule is detected in the left lobe of the central gland in the prostate ADC. Clinical correlation is necessary, and if needed, a biopsy should be performed.												BPH
248	79	FB	Suspicious abnormal signal observed in the left peripheral zone of the prostate, indicative of a possible lesion that needs to be further investigated.												BPH
249	65	SB	There is a suspicious small nodular enhancement signal in the lower posterior area of the left peripheral zone of the prostate.												BPH
250	67	SB	None												BPH
251	69	SB	None												Gleason score 3+4=7
252	63	SB	"There is a dot-like abnormal enhancement in the posterior side of the left peripheral zone of the prostate, suggesting possible active hyperplasia. Clinical correlation is recommended												BPH
253	78	SB	None												Gleason score 3+3=6
254	62	FB	There is an abnormal enhancing lesion in the right peripheral zone of the prostate, with the possibility of a tumorous lesion being considered. Clinical correlation is recommended.												Gleason score 3+4=7
255	74	SB	None												Gleason score 4+3=7
256	71	SB	Multiple spot-like abnormal signal lesions are present in the prostate.												Gleason score 3+3=6
257	80	FB	Low T2 signal in the left peripheral zone of the prostate, with possible occupancy not excluded, biopsy is recommended. Possible small square nodular lesion in the posterior aspect of the peripheral zone of the prostate												Gleason score 3+4=7
258	69	SB	None												Gleason score 4+4=8
259	79	FB	"There is significant enhancement and restricted diffusion observed in both peripheral zones of the prostate, suggesting possible prostate cancer. Scattered high signal areas are also seen in the peripheral zone of the prostate."												Gleason score 3+4=7
260	75	SB	None												Gleason score 4+3=7
261	64	SB	None												Gleason score 3+4=7
262	72	FB	"There is an abnormal enhancing lesion in the right peripheral zone of the prostate, and biopsy is recommended.												BPH
263	64	SB	None									v			BPH
264	62	SB	BPH												BPH
265	63	SB	None												BPH
266	67	SB	BPH												BPH
267	67	SB	None												同上
268	55	SB	BPH												BPH
269	63	SB	None												Gleason score 3+4=7
270	82	SB	None												Gleason score 3+4=7
271	71	SB	There is a nodular lesion in the upper right portion of the central gland of the prostate. Biopsy is recommended for further evaluation。												BPH
272	65	SB	BPH												Gleason score 4+4=8
273	66	SB	None												Gleason score 3+4=7
274	71	SB	The prostate shows abnormal signals within, and the boundary between the local area and the bladder wall is not clear. The DWI signal of the right seminal vesicle gland is elevated and requires further examination to determine the extent of involvement, taking into account clinical symptoms and relevant tests.												Gleason score 4+5=9
275	70	SB	There are suspicious abnormal signals in the left and right parts of the peripheral zone of the prostate, and biopsy is recommended。												Gleason score3+4=7
276	75	SB	There is a low signal lesion in the right peripheral zone and central gland of the prostate, suggesting a possible mass												Gleason score 4+4=8
277	63	SB	BPH												BPH
278	66	FB	Pca												Gleason score 5+4=9
279	67	FB	Prostatic region and intravesical occupying lesion, considering the possibility of advanced prostate cancer												BPH
280	57	FB	Prostate hyperplasia with multiple nodules, high signal in the left central gland on DWI scan, suggestive of neoplastic lesion."												BPH
281	84	SB	The manifestation of prostatic hyperplasia shows a decreased signal area near the seminal vesicle region on the left side of the ADC map, with the nature to be determined. Please combine it with relevant clinical examinations.												BPH
282	90	SB	BPH												无
283	73	SB	None												Gleason score 4+3=7
284	66	SB	There is a high possibility of occupying lesion in the left central lobe of the prostate												Gleason score 3+3=6
285	80	SB	There are two abnormal signal masses on the right portion of the central gland, and cancer needs to be ruled out. Further evaluation should be carried out based on clinical findings.												BPH
286	66	SB	BPH												BPH
287	70	SB	None												BPH
288	69	SB	BPH												BPH
289	61	SB	BPH												BPH
290	61	FB	BPH												BPH
291	64	FB	There is an abnormal signal in the left peripheral zone of the prostate, and cancer needs to be ruled out.												Gleason score 3+4=7
292	67	SB	None												BPH
293	78	SB	None												BPH
294	69	SB	BPH												BPH
295	71	FB	Abnormal signal shadows are present in the right central gland of the prostate and the left peripheral zone. The possibility of occupying lesions cannot be ruled out. Please combine with pathological examination.												Gleason score 4+4=8
296	62	FB	There is patchy abnormal slightly lower enhancement with diffuse restricted area in the central zone of the right prostate, which may be indicative of tumor lesions. In addition, there are scattered high signals in the central gland and peripheral zone of the prostate. Taking into account the clinical information, it is possible that there was bleeding after biopsy.												Gleason score 4+3=7
297	64	FB	Based on the manifestation of prostate hyperplasia, suspicious abnormal signals are found in the right peripheral zone and left central glandular area. Please consider clinical relevant examinations.。												BPH
298	72	SB	None												Gleason score 4+3=7
299	53	SB	The central gland of the prostate is deviated to the left side, and there are several punctate short T2 signals in the left peripheral zone. Please refer to the ultrasound examination for further analysis.												BPH
300	71	FB	Pca												Gleason score 5+4=9
301	70	SB	None												Gleason score 3+4=7
302	65	SB	None												Gleason score 3+4=7
303	45	SB	BPH												BPH
304	79	FB	The central gland and right peripheral region exhibit diffusion restriction on DWI imaging, with decreased ADC signal, suggestive of a tumor. Further evaluation is needed in consideration of the patient's clinical history.												Gleason score 4+5=9
305	86	FB	The presence of a nodular mass in the left anterior aspect of the prostate gland is difficult to exclude. It is recommended to undergo a biopsy for further diagnosis."												BPH
306	58	SB	BPH												BPH
307	78	FB	"Abnormal signal shadow in the left peripheral zone of the prostate, suspected to be a mass".												Gleason score 5+4=9
308	70	SB	Abnormal signal in the left peripheral zone and right posterior peripheral zone of the prostate gland, nature to be determined												BPH
309	69	FB	There is a small nodular shadow in the peripheral zone of the right posterior prostate. Cancer is suspected.												Gleason score 4+4=8
310	65	SB	Signal changes on the left peripheral zone of the prostate, please combine with clinical and relevant examinations.												BPH
311	90	SB	BPH												BPH
312	68	SB	Percutaneous biopsy is necessary if the DWI signal in the right peripheral zone of the prostate is slightly high.												BPH
313	66	FB	There is a small nodular shadow in the peripheral zone of the left prostate gland.												BPH
314	83	SB	None												Gleason score 3+3=6
315	70	SB	There are abnormal signal lesions in both peripheral zones of the prostate, with a potential tumor in the left peripheral zone that needs to be further evaluated.												Gleason score 3+4=7
316	62	SB	None												BPH
317	71	FB	There is a possibility of a mass in the anterior lobe of the prostate.												Gleason score 3+4=7
318	79	SB	BPH												BPH
319	79	FB	Small nodular lesion detected in the peripheral zone of the right lobe of the prostate.												BPH
320	70	SB	BPH												Gleason score 3+4=7
321	77	SB	BPH												BPH
322	70	SB	BPH												BPH
323	83	SB	BPH												Gleason score 3+4=7
324	77	SB	None												Gleason score 5+4=9
325	71	SB	None												BPH
326	71	SB	BPH												BPH
327	67	SB	BPH												BPH
328	65	SB	None												Gleason score 3+4=7
329	65	FB	There is a focal abnormal signal in the left peripheral zone of the prostate. Further evaluation should be carried out based on clinical findings												Gleason score 3+4=7
330	67	SB	None												Gleason score 3+4=7
331	72	FB	There is a suspicious enhancement lesion in the left peripheral zone of the prostate. Biopsy is recommended for further evaluation												Gleason score 3+3=6
332	54	FB	There are abnormal signal lesions in both peripheral zones of the prostate, please consider clinical information for further evaluation.												BPH
333	67	FB	There is a small nodule with low ADC signal in the right peripheral zone of the prostate. Please consider other clinical examinations and biopsy results for further diagnosis.												Gleason score 4+3=7
334	72	SB	BPH												BPH
335	64	SB	None												BPH
336	55	SB	BPH												BPH
337	71	SB	BPH												Gleason score3+4=7
338	70	SB	None												BPH
339	81	SB	There is a nodule on the right side of the prostate that requires attention, and there are multiple patchy abnormal signals within the prostate.												BPH
340	69	SB	None												Gleason score 4+4=8
341	80	FB	PCa。												Gleason score5+4=9
342	71	SB	None												Gleasonscore 3+3=6
343	61	SB	BPH												BPH
344	73	SB	Suspicious nodular shadow found on the left peripheral zone of the prostate, please take into account other examination results.												Gleason score 4+4=8
345	51	SB	BPH												BPH
346	69	FB	There is an abnormal signal in the right lower peripheral zone of the prostate gland, and malignant lesions are possible												BPH
347	65	SB	BPH												BPH
348	60	SB	BPH												BPH
349	63	SB	There is a low-signal shadow on the left peripheral zone of the prostate. It is recommended to perform a needle biopsy.												Gleason score 4+4=8
350	73	SB	BPH												BPH
351	52	SB	BPH												Gleason score 4+4=8
352	61	SB	BPH												BPH
353	72	FB	There is an abnormal signal focus in the right posterior peripheral zone of the prostate, and prostate cancer cannot be ruled out.												BPH
354	66	SB	None												BPH
355	56	SB	here is an abnormal signal in the right peripheral zone of the prostate, which may be related to the biopsy												BPH
356	85	FB	There is a small enhanced nodule in the peripheral zone of the prostate gland on the left side.												BPH
357	67	SB	None												Gleason score 4+4=8
358	56	FB	Prominent enhancing nodules in the left peripheral and central zones of the prostate, suggestive of space-occupying lesions possibly involving the central lobe. Biopsy is recommended.												Gleason score 3+4=7
359	61	SB	None												Gleason score3+3=6
360	64	SB	None												Gleason score3+3=6
361	70	SB	BPH												BPH
362	61	SB	BPH												Gleason score3+3=6
363	77	SB	BPH												BPH
364	70	SB	BPH												Gleason score 3+3=6
365	83	SB	None												Gleason score3+4=7
366	63	SB	Short T1 signal shadow in the middle lobe of right prostate.												Gleason score3+3=6
367	66	FB	BPH												BPH
368	71	SB	BPH												BPH
369	68	FB	Abnormal signal shadow in the peripheral zone behind the prostate, cannot rule out the possibility of occupying lesions.												Gleason score 3+4=7
370	74	FB	"Localized nodular lesions in the central and left lobes of the prostate, with suspicion of malignant tumors. Further analysis is necessary in combination with clinical information and biopsy is recommended."												Gleason score 5+4=9
371	84	SB	BPH												Gleason score 3+4=7
372	44	FB	The signal on the peripheral zone of both sides of the prostate is abnormal and unevenly enhanced, suggestive of the presence of a space-occupying lesion												BPH
373	64	SB	None												BPH
374	59	SB	BPH												BPH
375	54	SB	BPH。												BPH
376	58	SB	Signal changes in the peripheral zones of both sides of the prostate, considering the possibility of changes after biopsy, and not ruling out the possibility of malignant lesions based on medical history												Gleason scoer 3+3=6
377	75	SB	None												Gleason socer 3+3=6
378	75	SB	BPH												BPH
379	73	SB	BPH												BPH
380	56	SB	BPH												无
381	73	SB	Abnormal signal in the left anterior peripheral zone of the prostate, suggesting a possible tumor lesion												Gleason score 3+4=7
382	70	SB	Localized nodular enhancing signal in the central gland of the prostate, with diffuse high signal changes on diffusion-weighted imaging. Further analysis is necessary in combination with clinical information, PSA level and biopsy results												BPH
383	55	FB	BPH												BPH
384	65	SB	BPH												BPH
385	74	SB	BPH												BPH
386	66	SB	There is a small nodule in the left central gland of the prostate, please consider clinical information and other examinations for further evaluation												BPH
387	48	FB	The prostate appears full and shows calcification. A nodular abnormal signal is present in the right peripheral zone, which raises suspicion for a tumor."												BPH
388	67	FB	Abnormal signals were found in the peripheral zone of the prostate and bilateral seminal vesicles, which may indicate prostate cancer with bilateral seminal vesicle invasion.												BPH
389	86	SB	"There are signal lesions in the central gland and peripheral zone of the prostate, indicating possible prostate cancer with bleeding and calcification, and accompanied by pelvic lymph node metastasis."												Gleason scoer 4+5=9
390	69	FB	"Prostate hyperplasia is present, with a nodular enhancement seen in the left peripheral zone. Clinical correlation is recommended."												BPH
391	69	SB	BPH												BPH
392	57	SB	None												Gleason scoer 4+3=7
393	74	SB	BPH												BPH
394	59	SB	BPH												BPH
395	89	SB	BPH												Gleason score 5+4=9
396	85	FB	"There is an abnormal signal on the left side of the central gland of the prostate, and the possibility of a tumorous lesion cannot be ruled out												BPH
397	73	SB	BPH												BPH
398	74	SB	The central gland of the prostate shows low signal, and abnormal signal areas are seen on both sides of the peripheral zone of the prostate, with bleeding being considered as a possibility												BPH
399	64	SB	BPH												BPH
400	84	FB	"Abnormal signal lesions are present in the central gland and peripheral zone of the prostate, indicating possible prostate cancer that has locally invaded the left seminal vesicle. Biopsy is recommended, along with clinical assessment.												Gleason score 4+3=7
401	78	FB	a nodule-like shadow is seen in the right peripheral zone, and the possibility of tumorous lesion cannot be ruled out. Further evaluation based on clinical findings and relevant tests is recommended, with biopsy being recommended												BPH
402	62	FB	A small nodular enhancement is present in the right central lobe of the prostat												BPH
403	69	SB	BPH												BPH
404	71	FB	"There are localized small patchy enhancement shadows in the peripheral zone of the prostate, and the possibility of a mass cannot be ruled out. Further evaluation based on clinical findings and biopsy is recommended."												BPH
405	53	SB	None												BPH
406	59	SB	BPH												BPH
407	63	FB	"There is an abnormal signal area at the anterior edge of the right peripheral zone of the prostate, and inflammatory lesions cannot be ruled out. Further evaluation based on clinical findings and relevant tests is recommended."												BPH
408	66	SB	BPH												BPH
409	58	SB	BPH												Gleason score3+3=6
410	54	FB	BPH												BPH
411	59	SB	None												Gleason score 3+3=6
412	63	FB	"There is a nodular enhancement in the right central lobe of the prostate.												BPH
413	66	FB	There is a nodular abnormal signal area within the left peripheral zone of the prostate, and the possibility of a tumorous lesion cannot be ruled out. Further evaluation with ultrasound examination is recommended.												Gleason分级3+3=6分
414	51	FB	"There is a nodule in the central gland of the prostate on the left side, which is likely a nodular hyperplasia. The left peripheral zone of the prostate has a slightly reduced T2 signal with insufficient local enhancement, and biopsy is recommended for further evaluation."												BPH
415	66	FB	The abnormal signal in the left peripheral zone of the prostate suggests a possibility of occupying lesion												Gleason score 3+3=6
416	70	SB	BPH												BPH
417	90	SB	None												Gleason score 4+4=8
418	57	SB	BPH												BPH
419	68	SB	The nodule on the left posterior aspect of the prostate needs attention, and biopsy may be necessary based on clinical findings.												BPH
420	66	SB	None												BPH
421	53	FB	There is a significantly enhancing nodule on the central gland of the prostate, and follow-up examination is recommended. There is a suspicious low signal in the left inferior peripheral zone, and biopsy is recommended for further evaluation.												BPH
422	55	FB	"There is a enhancing nodular lesion in the right peripheral zone of the prostate with benign prostatic hyperplasia. Further evaluation and biopsy should be carried out based on clinical findings if necessary."												BPH
423	65	FB	There is an abnormal signal nodule in the peripheral zone of the prostate, and prostate cancer is possible. Biopsy is recommended for further evaluation												Gleason score 4+4=8
424	48	SB	BPH												BPH
425	59	SB	BPH												BPH
426	68	SB	None												Gleason score3+3=6
427	55	FB	BPH												BPH
428	58	FB	There are abnormal signal foci in the right peripheral zone, mostly in the central gland and partly in the left peripheral zone of the prostate, and the possibility of prostate cancer is considered.												Gleason score4+4=8
429	69	SB	None												BPH
430	73	SB	BPH												BPH
431	72	SB	None												BPH
432	56	SB	BPH												BPH
433	69	SB	None												BPH
434	71	FB	There is a suspicious abnormal signal focus in the left peripheral zone of the prostate.												Gleason score 3+3=6
435	66	FB	PCa												BPH
436	63	FB	There is an abnormal signal shadow on the right side of the inner gland and on the left side of the outer gland of the prostate."												BPH
437	72	FB	There is an abnormal signal nodule on the left side of the central gland of the prostate, and the possibility of tumor lesion needs to be ruled out.												BPH
438	78	FB	There is an abnormal signal in the right rear part of the peripheral zone of the prostate, and the possibility of tumor lesion is considered.												Gleason score 4+4=8
439	70	SB	BPH												Gleason score 3+3=6
440	66	FB	There is an abnormal signal on the right side of the central gland of the prostate, and the possibility of tumor lesion cannot be ruled out. Biopsy is recommended.												Gleason score 3+3=6
441	87	SB	None												Gleason score 4+4=8
442	69	FB	There is a nodular lesion in the right peripheral zone of the prostate, which may indicate the presence of prostate cancer.												Gleason score 4+3=7
443	77	FB	There is an abnormal signal focus in the left side of the central gland of the prostate.												BPH
444	84	FB	There is a suspicious nodular lesion in the left peripheral zone, and the possibility of tumor lesion needs to be ruled out.												Gleason score 3+4=7
445	47	FB	PCa												Gleason score 4+5=9
446	56	FB	"There is a nodular lesion in the right central gland of the prostate with decreased ADC signal, and biopsy may be necessary												BPH
447	87	FB	There are abnormal signal foci in the central gland and right peripheral zone of the prostate.												Gleason score 4+4=8
448	65	FB	There is a nodular lesion at the upper margin of the central gland of the prostate, which may indicate the presence of a tumor.												Gleason score 3+4=7
449	72	FB	"There is a suspicious signal in the right peripheral zone of the prostate.												BPH
450	75	SB	None												Gleason score 4+4=8
451	66	SB	BPH												Gleason score 4+3=7
452	59	SB	BPH												BPH
453	79	SB	BPH												BPH
454	63	SB	BPH												BPH
455	71	SB	There is a small nodular lesion in the right posterior aspect of the prostate												BPH
456	76	SB	BPH												BPH
457	77	SB	BPH												BPH
458	52	SB	BPH												BPH
459	67	FB	There is an abnormal signal in the right peripheral zone of the prostate												Gleason score4+5=9
460	72	SB	There is a small nodular lesion in the right peripheral zone of the prostate, and the possibility of a tumor cannot be ruled out.												BPH
461	58	SB	BPH												BPH
462	77	SB	BPH												Gleason score4+3=7
463	68	FB	Central gland nodular abnormal signal in the prostate, suggestive of tumor. Further evaluation is needed												BPH
464	67	SB	None												Gleason score5+5=10
465	80	FB	Small nodular abnormal signal detected in the left peripheral zone of the prostate, a possibility of neoplasm cannot be completely ruled out												BPH
466	60	FB	Abnormal signal detected in the left peripheral zone of the prostate, with possible occupying lesion that needs further evaluation.												Gleason score4+3=7
467	70	FB	Suspicious abnormal signal detected in the lower part of the right peripheral zone with obvious enhancement in that area, please combine with clinical and needle biopsy findings.												BPH
468	70	SB	BPH												BPH
469	72	FB	BPH												BPH
470	61	FB	Suspicious nodular lesion detected in the peripheral zone of the left lobe of the prostate, which is suggestive of tumor.												Gleason score4+3=7
471	77	FB	An abnormally enhanced nodule is found in the right portion of the central zone of the prostate.												Gleason score3+3=6
472	57	FB	Abnormal signal nodular lesion found in the left portion of the central zone of the prostate.												BPH
473	51	FB	Suspicious abnormal signals are detected in the posterior peripheral zones of both lobes of the prostate. Biopsy is recommended for further investigation												BPH
474	65	SB	BPH												BPH
475	73	FB	Pca												Gleason score5+4=9
476	63	SB	Abnormal signal nodular lesion found in the right lobe of the prostate.												BPH
477	77	SB	BPH												BPH
478	70	SB	BPH												BPH
479	63	SB	None												BPH
480	67	FB	There is a lesion occupying the peripheral zone on the left side, and the possibility of tumor-related pathology cannot be ruled out. It is recommended to perform a biopsy for further diagnosis.												Gleason score3+3=6
