# Supplementary material for: Comparative diagnostic accuracy of multiparametric magnetic resonance imaging-ultrasound fusion-guided biopsy versus systematic biopsy for clinically significant prostate cancer
Source: PeerJ. 2023 Dec 14;11:e16614. doi: 10.7717/peerj.16614 (PMC10725670; doi:10.7717/peerj.16614)
Supplement: Supplemental Information 2 [file peerj-11-16614-s002.xls]

## Sheet: Sheet1
序号(No)	年龄(Age)	穿刺记录（Puncture Record）	MR												病理（Pathology）
1	81岁	一、前列腺超声造影检查： 前列腺未见明显异常增强区 二、超声引导下前列腺系统穿刺术 （建议静卧床24小时，请临床注意观察术后并发症。）	考虑前列腺增生。双侧前列腺外周带信号欠均匀，建议进一步检查。												“左前列腺穿刺”前列腺腺癌，Gleason分级4+3=7分，可见神经束累犯。“右前列腺穿刺”前列腺腺癌，Gleason分级3+4=7分。免疫组化结果：AMACR[+]P63[-]34βE12[-]。
2	63岁	一、前列腺超声造影检查： 前列腺右侧外腺结节呈“快进快出”高增强 二、超声引导下前列腺系统穿刺术 （建议静卧床24小时，请临床注意观察术后并发症。）	前列腺增生。前列腺右侧外周带异常信号，考虑良性病变，建议必要时复查。												“左、右前列腺穿刺”前列腺腺癌，Gleason分级4+4=8分。免疫组化结果：AMACR[+]P63[-]34βE12[-]。
3	65岁	一、前列腺超声造影检查： 前列腺未见明显异常增强区 二、超声引导下前列腺系统穿刺术 （建议静卧床24小时，请临床注意观察术后并发症。）	前列腺增生考虑，请结合临床。												“左、右前列腺穿刺”前列腺增生性病变，慢性前列腺炎。免疫组化结果：免疫组化：P63[+]34βE12[+]AMACR[-]。
4	75岁	一、前列腺超声造影检查： 前列腺右侧外腺局部呈“快进快出”高增强 二、超声引导下前列腺系统穿刺术 （建议静卧床24小时，请临床注意观察术后并发症。）	前列腺增生症，请结合临床。盆腔少许积液。												“左、右前列腺穿刺”前列腺增生性病变，局灶见小团腺体，腺上皮细胞略增大，可见小核仁，免疫组化提示基底细胞显著减少，考虑为不典型小腺体。免疫组化结果：免疫组化：P63小区[-]34βE12小区[-]AMACR[-]。
5	77岁	一、前列腺超声造影检查： 前列腺左侧外腺区结节呈“快进快出”高增强 二、超声引导下前列腺系统穿刺术 （建议静卧床24小时，请临床注意观察术后并发症。）	前列腺偏大，提示增生，左侧外周带可疑结节影，请结合其他检查。												“左前列腺穿刺”前列腺腺癌，Gleason分级3+4=7分。“右前列腺穿刺”前列腺腺癌，Gleason分级3+3=6分。免疫组化结果：AMACR[+]P63[-]34βE12[-]。
6	57岁	一、前列腺超声造影检查： 前列腺左侧外腺区结节呈“快进快出”高增强 二、超声引导下前列腺系统穿刺术 （建议静卧床24小时，请临床注意观察术后并发症。）	前列腺增生，左侧前列腺外周带结节影，建议进一步检查。												“左、右前列腺穿刺”前列腺良性增生性病变，灶性见淋巴细胞、中性粒细胞浸润。免疫组化结果：免疫组化：P63[+]34βE12[+]AMACR[-]。
7	56岁	一、前列腺超声造影检查： 前列腺外腺局部呈“快进快出”高增强 二、超声引导下前列腺系统穿刺术 （建议静卧床24小时，请临床注意观察术后并发症。）	前列腺增大，前列腺外周带斑片状异常信号灶，提示穿刺后出血表现，请结合临床及必要时复查。												“左、右前列腺穿刺”前列腺良性增生性病变，局灶间质见大量淋巴细胞、中性粒细胞浸润、泡沫细胞反应、纤维组织增生。
8	59岁	一、前列腺超声造影检查： 前列腺外腺局部呈“快进快出”高增强 二、超声引导下前列腺系统穿刺术 （建议静卧床24小时，请临床注意观察术后并发症。）	前列腺癌治疗后复查，骨盆骨质多发异常信号，考虑转移瘤，请结合临床？												“右前列腺穿刺”前列腺腺癌，Gleason分级4+4=8分，肿瘤占比约80%。“左前列腺穿刺”，前列腺增生性病变。免疫组化结果：右侧：P63[-]34βE12[-]AMACR[+]S-100[-]。
9	67岁	一、前列腺超声造影检查： 前列腺外腺局部呈“慢进快出”低增强 二、超声引导下前列腺系统穿刺术 （建议静卧床24小时，请临床注意观察术后并发症。）	前列腺增生；精阜囊肿。												“左、右前列腺穿刺”前列腺慢性炎伴增生。免疫组化结果：免疫组化：P63[+]34βE12[+]AMACR[-]。
10	60岁	一、前列腺超声造影检查： 前列腺左侧外腺区局部腺体呈“快进同出”高增强 二、超声引导下前列腺系统穿刺术 （建议静卧床24小时，请临床注意观察术后并发症。）	左侧前列腺异常信号，占位性病变可能，请结合临床，建议穿刺检查。												“左、右前列腺穿刺”前列腺增生性病变，慢性前列腺性炎。免疫组化结果：免疫组化：P63[+]34βE12[+]AMACR[-]。
11	70岁	一、前列腺超声造影检查： 前列腺外腺局部呈“快进快出”高增强 二、超声引导下前列腺系统穿刺术 （建议静卧床24小时，请临床注意观察术后并发症。）	未做												“左、右前列腺穿刺”前列腺增生性病变，慢性前列腺炎。免疫组化结果：免疫组化：P63[+]34βE12[+]AMACR[-]。
12	71岁	前列腺超声造影检查： 前列腺左侧内外交界处局部呈“快进快出”高增强 超声引导下前列腺系统穿刺术 （建议静卧床24小时，请临床注意观察术后并发症。）	前列腺增生；前列腺左侧内外腺交界区异常信号灶，肿瘤性病变可能，请结合临床。												“左前列腺穿刺”前列腺慢性炎伴中性粒细胞浸润及腺腔积脓，局灶间质淋巴组织增生，另见少许横纹肌组织。“右前列腺穿刺”前列腺慢性炎伴部分腺体增生，间质伴少许中性粒细胞浸润，部分腺腔积脓，小灶区域间质细胞增生。免疫组化结果：“左侧”P63[+]34βE12[+]AMACR[-]，“右侧”P63[+]34βE12[+]AMACR灶性弱[+]。
13	74岁	一、前列腺超声造影检查： 前列腺右侧外腺结节呈“快进快出”高增强 二、超声引导下前列腺系统穿刺术 （建议静卧床24小时，请临床注意观察术后并发症。）	双侧前列腺外周带异常信号灶，肿瘤性病变可能大，请结合临床。前列腺增生。												“左前列腺穿刺”前列腺腺癌，Gleason分级5+4=9分，累及神经束，肿瘤占比约35%。“右前列腺穿刺”前列腺腺癌，Gleason分级4+5=9分，累及神经束，肿瘤占比约70%。免疫组化结果：AMACR[+]P63[-]34βE12[-]S-100神经束[+]。
14	71岁	一、前列腺超声造影检查： 前列腺外腺局部呈“快进快出”高增强 二、超声引导下前列腺系统穿刺术 （建议静卧床24小时，请临床注意观察术后并发症。）	前列腺增生考虑，右侧外周带前缘局部稍短T2信号，有所强化，弥散扫描尚未见明显异常高信号，请结合临床相关检查及随访或必要时活检。												“左、右前列腺穿刺”前列腺增生性病变。免疫组化结果：免疫组化：P63[+]34βE12[+]AMACR[-]。
15	64岁	一、前列腺超声造影检查： 前列腺外腺局部呈“快进慢出”高增强 二、超声引导下前列腺系统穿刺术 （建议静卧床24小时，请临床注意观察术后并发症。）	前列腺右侧外周带富血管结节，前列腺癌待排，建议穿刺活检。												“右前列腺穿刺”前列腺腺癌，Gleason分级4+3=7分。“左前列腺穿刺”，前列腺增生性病变。免疫组化结果：右侧：P63[-]34βE12[-]AMACR[+]，左侧：P63[+]34βE12[+]AMACR[-]。
16	76岁	一、前列腺超声造影检查： 前列腺未见明显异常增强区 二、超声引导下前列腺系统穿刺术 （建议静卧床24小时，请临床注意观察术后并发症。）	前列腺增生伴多发小结石。												“左前列腺穿刺”前列腺腺癌，Gleason分级3+3=6分。“右前列腺穿刺”，前列腺增生性病变。免疫组化结果：左侧：P63[-]34βE12[-]AMACR[+]，右侧：P63[+]34βE12[+]AMACR[-]。
17	73岁	一、前列腺超声造影检查： 前列腺未见明显异常增强区 二、超声引导下前列腺系统穿刺术 （建议静卧床24小时，请临床注意观察术后并发症。）	前列腺增生，两侧外周带片状短T1信号，结合病史考虑穿刺后改变，请结合临床，必要时随访复查。												“左、右前列腺穿刺”前列腺增生性病变。免疫组化结果：免疫组化：P63[+]34βE12[+]AMACR[-]。
18	54岁	一、前列腺超声造影检查： 前列腺未见明显异常增强区 二、超声引导下前列腺系统穿刺术 （建议静卧床24小时，请临床注意观察术后并发症。）	前列腺增生可符；左后外周带局部稍短T2信号，请结合临床及相关检查。必要时活检。												“左、右前列腺穿刺”前列腺增生性病变。免疫组化结果：免疫组化：P63[+]34βE12[+]AMACR[-]。
19	74岁	一、前列腺超声造影检查： 前列腺外腺局部呈“快进快出”高增强 二、超声引导下前列腺系统穿刺术 （建议静卧床24小时，请临床注意观察术后并发症。）	前列腺信号异常，结合病史，前列腺癌侵及两侧精囊腺及膀胱可能大，盆腔多发淋巴结转移，请结合临床。前列腺增生。												“左、右前列腺穿刺”前列腺腺癌，Gleason分级4+4=8分。免疫组化结果：AMACR[+]P63[-]34βE12[-]。
20	63岁	一、前列腺增生伴结石，超声造影提示：前列腺未见明显异常增强区 二、超声引导下前列腺系统穿刺术 （建议静卧床24小时，请临床注意观察术后并发症。）	前列腺增生伴多发钙化斑；前列腺囊肿。												“左前列腺穿刺”前列腺增生性病变可能另见少许横纹肌组织。“右前列腺穿刺”，前列腺增生性病变，局灶间质淋巴细胞、浆细胞浸润。免疫组化结果：P63[+]34βE12[+]AMACR[-]。
21	72岁	前列腺超声造影检查： 前列腺右侧外腺局部呈“快进快出”高增强，建议穿刺活检 一、前列腺增生伴结石，超声造影提示：前列腺未见明显异常增强区 二、超声引导下前列腺系统穿刺术 （建议静卧床24小时，请临床注意观察术后并发症。）	未做												“左前列腺穿刺”前列腺腺癌，Gleason分级3+3=6分，肿瘤占比15%，周围可见小区高级别上皮内瘤变（HPIN）。“右前列腺穿刺”前列腺腺癌，Gleason分级4+3=7分，肿瘤占比约60%，可见神经束累犯，周围伴多灶高级别上皮内瘤变（HPIN）成份。免疫组化结果：AMACR[+]P63[-]34βE12[-]S-100神经束[+]。
22	71岁	前列腺超声造影检查： 前列腺左侧内外腺交界处局部呈“同进快出”结节样高增强，建议密切随访PSA，必要时穿刺活检	未做												无
23	78岁	一、前列腺超声造影检查： 前列腺右侧外腺结节呈“快进快出”高增强 二、超声引导下前列腺系统穿刺术 （建议静卧床24小时，请临床注意观察术后并发症。）	前列腺增生；前列腺右侧外周带靠外侧异常信号灶，良性囊性病变考虑，请结合相关检查。												“左前列腺穿刺”前列腺增生性病变，局灶腺上皮增大，可见核仁，免疫组化提示基底细胞显著减少，考虑不典型小腺体。“右前列腺穿刺”，前列腺增生性病变。免疫组化结果：左侧：P63小区[-]34βE12小区[-]AMACR小区弱[+]，右侧：P63[+]34βE12[+]AMACR[-]。
24	61岁	一、前列腺超声造影检查： 前列腺未见明显异常增强区 二、超声引导下前列腺系统穿刺术 （建议静卧床24小时，请临床注意观察术后并发症。）	右侧前列腺外周带异常信号影，请结合临床及其他检查。												“左、右前列腺穿刺”前列腺良性增生性病变。
25	79岁	一、前列腺超声造影检查： 前列腺左侧外腺局部呈“快进快出”高增强 二、超声引导下前列腺系统穿刺术 （建议静卧床24小时，请临床注意观察术后并发症。）	前列腺增生；前列腺外周带及精囊腺短T1等T2信号，请结合临床除外出血可能。												1.“左侧前列腺穿刺标本”前列腺腺癌，Gleason分级4+5=9分。（）肿瘤占比约90%）。1.“右侧列腺穿刺标本”前列腺腺癌，Gleason分级5+4=9分，（肿瘤占比约40%），局灶累犯神经束。免疫组化结果：免疫组化：AMACR[+]P63[-]34βE12[-]S-100神经[+]。
26	81岁	一、前列腺超声造影检查： 前列腺双侧外腺呈“快进快出”高增强 二、超声引导下前列腺穿刺术 三、超声引导下前列腺内积液抽液术 （建议静卧床24小时，请临床注意观察术后并发症。）	上述征象，考虑前列腺来源恶性肿瘤伴多发骨转移、直肠受侵可能，请结合临床。												“左、右前列腺穿刺”结合免疫组化结果，前列腺来源的低分化癌首先考虑，Gleason分级5+4=9分。免疫组化结果：免疫组化：CK7个别[+]CK20[-]PSA弱[+]GATA-3[-]ERG[-]Syn[-]CgA个别[+]P63[-]P40[-]。
27	62岁	前列腺超声造影检查： 前列腺左侧外腺局部呈“快进快出”高增强	前列腺增生。中央腺后上部异常信号灶，肿瘤性病变可能，建议穿刺活检。												“左前列腺穿刺”前列腺慢性炎伴腺体增生，部分腺腔积脓、泡沫样组织细胞积聚。“右前列腺穿刺”前列腺腺组织，间质多量急慢性炎症细胞伴局灶组织细胞反应、腺腔积脓。免疫组化结果：AMACR灶性弱[+]P63[-]34βE12[-]。
28	67岁	一、前列腺增生伴结石，超声造影提示：前列腺未见明显异常增强区 二、超声引导下前列腺系统穿刺术 （建议静卧床24小时，请临床注意观察术后并发症。）	未做												“左前列腺穿刺”前列腺组织，小灶腺体异型，基底细胞减少、消失，结合免疫组化结果，高度怀疑为前列腺腺癌（该成分少）。“右前列腺穿刺”，前列腺慢性炎伴增生，小区前列腺腺体增生活跃，待补充免疫组化。免疫组化结果：左侧小区腺体异型组化：P63[-]34βE12减少或消失AMACR[+]。
29	68岁	一、前列腺超声造影检查： 前列腺双侧外腺局部呈“快进快出”稍高不均增强，建议活检 二、超声引导下前列腺系统穿刺术 （建议静卧床24小时，请临床注意观察术后并发症。）	未做												“左、右前列腺穿刺”前列腺慢性炎伴增生。免疫组化结果：免疫组化：P63[+]34βE12[+]AMACR[-]。
30	73岁	一、前列腺超声造影检查： 前列腺未见明显异常增强区 二、超声引导下前列腺系统穿刺术 （建议静卧床24小时，请临床注意观察术后并发症。）	前列腺增生，前列腺上部异常信号，前列腺Ca可能，请结合临床，建议复查。左侧精囊腺信号异常，出血或精血滞留可能。两侧腹股沟淋巴结稍肿大。												“左、右前列腺穿刺”前列腺腺癌，Gleason分级4+3=7分。免疫组化结果：AMACR弱[+]P63[-]34βE12[-]。
31	71岁	一、前列腺超声造影检查： 前列腺未见明显异常增强区 二、超声引导下前列腺系统穿刺术 （建议静卧床24小时，请临床注意观察术后并发症。）	前列腺增生改变；前列腺内斑片状短T1信号影，请结合临床病史。												“左侧、前列腺穿刺”前列腺增生性病变，慢性前列腺炎。免疫组化结果：免疫组化：P63[+]34βE12[+]AMACR[-]。
32	63岁	一、前列腺超声造影检查： 前列腺未见明显异常增强区 二、超声引导下前列腺系统穿刺术 （建议静卧床24小时，请临床注意观察术后并发症。）	前列腺增生改变，右侧中叶腺信号短T1信号影，出血考虑；右侧中央腺局限性向后突出，请结合穿刺结果。												“右前列腺穿刺”前列腺腺癌，Gleason分级3+3=6分。“左前列腺穿刺”，前列腺增生性病变，慢性前列腺炎。免疫组化结果：右侧：P63[-]34βE12[-]AMACR[+]，左侧：P63[+]34βE12[+]AMACR[-]。
33	79岁	一、前列腺超声造影检查： 前列腺右侧外腺局部呈“快进快出”高增强，CA考虑 二、超声引导下前列腺系统穿刺术 （建议静卧床24小时，请临床注意观察术后并发症。）	未做												“左前列腺穿刺”前列腺腺癌，Gleason分级5+5=10分。“右前列腺穿刺”前列腺腺癌，Gleason分级5+3=8分。免疫组化结果：AMACR[+]P63[-]34βE12[-]。
34	67岁	超声造影检查 前列腺左外腺结节呈环状高增强，内部未见增强，提示：前列腺炎症可能大	未做												“左前列腺穿刺”前列腺增生性病变伴慢性炎，间质纤维血管增生，淋巴细胞、浆细胞及中性粒细胞浸润，局灶腺腔积脓。“右前列腺穿刺”，前列腺增生性病变，慢性前列腺炎。免疫组化结果：P63[+]34βE12[+]AMACR[-]。
35	66岁	一、前列腺增生伴结石，超声造影提示：前列腺未见明显异常增强区 二、超声引导下前列腺系统穿刺术 （建议静卧床24小时，请临床注意观察术后并发症。）	前列腺增生考虑，请结合临床。												“左、右前列腺穿刺”前列腺增生性病变，慢性前列腺炎。免疫组化结果：免疫组化：P63[+]34βE12[+]AMACR[-]。
36	66岁	一、前列腺超声造影检查：前列腺未见明显异常增强区 二、超声引导下前列腺系统穿刺术 （建议静卧床24小时，请临床注意观察术后并发症。）	未做												“左、右前列腺穿刺”前列腺良性增生性病变。
37	62岁	一、前列腺增生伴结石，超声造影提示：前列腺未见明显异常增强区 二、超声引导下前列腺系统穿刺术 （建议静卧床24小时，请临床注意观察术后并发症。）	未做												“左、右前列腺穿刺”前列腺良性增生性病变。免
38	71岁	一、前列腺超声造影检查： 前列腺造影未见明显异常 二、超声引导下前列腺系统穿刺术 （建议静卧床24小时，请临床注意观察术后并发症。）	未做												“左、右前列腺穿刺”前列腺良性增生性病变。
39	65岁	一、前列腺超声造影检查： 前列腺造影未见明显异常 二、超声引导下前列腺系统穿刺术 （建议静卧床24小时，请临床注意观察术后并发症。）	未做												“左、右前列腺穿刺”前列腺良性增生性改变。
40	69岁	一、前列腺超声造影检查： 前列腺左侧外腺区结节呈“快进快出”略高增强 二、超声引导下前列腺系统穿刺术 （建议静卧床24小时，请临床注意观察术后并发症。）	前列腺增生表现。附见：直肠壁稍增厚毛糙，请结合临床。												“左、右前列腺穿刺”前列腺增生性病变。免疫组化结果：免疫组化：P63[+]34βE12[+]AMACR[-]。
41	69岁	一、前列腺增生伴结石，超声造影提示：前列腺未见明显异常增强区 二、超声引导下前列腺系统穿刺术 （建议静卧床24小时，请临床注意观察术后并发症。）	未做												“左、右前列腺穿刺”前列腺增生性病变。免疫组化结果：免疫组化：P63[+]34βE12[+]AMACR[-]。
42	60岁	一、前列腺增生伴结石，超声造影提示：前列腺未见明显异常增强区 二、超声引导下前列腺系统穿刺术 （建议静卧床24小时，请临床注意观察术后并发症。）	未做												“左、右前列腺穿刺”前列腺腺癌，Gleason分级3+3=6分。免疫组化结果：AMACR[+]P63[-]34βE12[-]。
43	56岁	一、前列腺超声造影检查： 前列腺左侧外腺局部呈“快进快出”高增强，前列腺CA待排 二、超声引导下前列腺系统穿刺术 （建议静卧床24小时，请临床注意观察术后并发症。）	前列腺右侧外周带异常信号灶，肿瘤性病变待排，建议穿刺活检。前列腺增生。												“左、右前列腺穿刺”前列腺增生性病变。免疫组化结果：免疫组化：P63[+]34βE12[+]AMACR[-]。
44	62岁	一、前列腺超声造影检查： 前列腺未见明显异常增强区 二、超声引导下前列腺系统穿刺术 （建议静卧床24小时，请临床注意观察术后并发症。）	前列腺增生考虑，请结合临床及相关检查。												“左前列腺穿刺”前列腺增生性病变，炎性间质内少许淋巴细胞、浆细胞浸润。“右前列腺穿刺”，前列腺增生性病变，灶性间质内淋巴细胞、浆细胞浸润。免疫组化结果：P63[+]34βE12[+]AMACR[-]。
45	71岁	一、前列腺超声造影检查： 前列腺未见明显异常增强区 二、超声引导下前列腺系统穿刺术 （建议静卧床24小时，请临床注意观察术后并发症。）	未做												“左、右前列腺穿刺”前列腺慢性炎伴增生。免疫组化结果：免疫组化：P63[+]34βE12[+]AMACR[-]。
46	82岁	一、前列腺超声造影检查： 前列腺未见明显异常增强区 二、超声引导下前列腺系统穿刺术 （建议静卧床24小时，请临床注意观察术后并发症。）	前列腺中央腺体右侧异常信号，请结合临床及其他检查。前列腺增生伴结石考虑。												“右前列腺穿刺”前列腺慢性炎伴腺体增生，另见血凝块内小团游离上皮伴泡沫样胞质，未见明显大核仁，P504s阳性表达，意义不明确，建议密切随访。“左前列腺穿刺”，前列腺慢性炎伴增生。免疫组化结果：左侧：P63[+]34βE12[+]AMACR[-]，右侧：P63[+]34βE12[+]AMACR小灶[+]。
47	71岁	一、前列腺超声造影检查： 前列腺右侧外腺结节呈“快进快出”高增强 提示：前列腺CA首先考虑 二、超声引导下前列腺系统穿刺术 （建议静卧床24小时，请临床注意观察术后并发症。）	前列腺中央腺体-右侧外周带异常报告，考虑前列腺Ca可能性大，请结合临床及其他检查。盆腔少量积液。												“左前列腺穿刺”前列腺组织内见小灶腺体增生，结合免疫组化，符合前列腺腺癌，Gleason分级3+3=6分。“右前列腺穿刺”前列腺腺癌，Gleason分级3+3=6分，累及神经束。免疫组化结果：左侧：AMACR小灶[+]P63小灶[-]34βE12小灶[-]S-100神经束[+]，右侧：免疫组化结果：AMACR[+]P63[-]34βE12[-]S-100神经束[+]。
48	83岁	一、前列腺超声造影检查： 前列腺右侧外腺局部呈“快进快出”略高增强 二、超声引导下前列腺系统穿刺术 （建议静卧床24小时，请临床注意观察术后并发症。）	前列腺右侧外周带异常信号，考虑前列腺Ca可能，双侧盆腔淋巴结肿大，请结合临床。												“左前列腺穿刺”前列腺腺癌，Gleason分级3+3=6分。“右前列腺穿刺”，前列腺增生性病变。免疫组化结果：左侧：P63[-]34βE12[-]AMACR[+]，右侧：P63[+]34βE12[+]AMACR[-]。
49	81岁	一、前列腺超声造影检查： 前列腺造影未见明显异常 二、超声引导下前列腺系统穿刺术 （建议静卧床24小时，请临床注意观察术后并发症。）	前列腺增生考虑，外周带短T1高信号，欠均强化明显，穿刺后出血表现，结节占位评估受限，请结合临床及相关检查。												“右前列腺穿刺”前列腺腺癌，Gleason评分呈4级形态，肿瘤占比<1%（最大径约0.5mm）。“左前列腺穿刺”，前列腺增生性病变，局灶间质内淋巴细胞、浆细胞浸润，另见少许横纹肌。免疫组化结果：右侧小灶癌区：P63[-]34βE12[-]AMACR[+]，左侧：P63[+]34βE12[+]AMACR[-]。
50	63岁	一、前列腺超声造影检查： 前列腺左侧外腺不均质回声结节呈“快进快出”高增强 二、超声引导下前列腺系统穿刺术 （建议静卧床24小时，请临床注意观察术后并发症。）	前列腺左侧外周带异常信号结节，考虑肿瘤性病变可能性大，请结合临床及穿刺结果。												1.“左侧前列腺穿刺标本”前列腺腺癌，Gleason分级4+3=7分。（肿瘤占比约70%）。1.“右侧前列腺穿刺标本”前列腺腺癌，Gleason分级3+3=6分。（肿瘤占比约10%），免疫组化结果：免疫组化：AMACR[+]P63[-]34βE12[-]。
51	69岁	一、前列腺超声造影检查： 前列腺右侧叶及外腺区呈“快进快出”高增强 二、超声引导下前列腺系统穿刺术 （建议静卧床24小时，请临床注意观察术后并发症。）	未做												1.“左侧前列腺穿刺标本”前列腺腺癌，Gleason分级5+4=9分。肿瘤占比约90%，周围见高级别前列腺上皮内瘤变（HPIN）。1.“右侧前列腺穿刺标本”前列腺腺癌，Gleason分级4+4=8分。肿瘤占比约90%。免疫组化结果：免疫组化：AMACR[+]P63[-]34βE12[-]Syn[-]CgA[-]ERG[+]。
52	83岁	一、前列腺超声造影检查： 前列腺造影未见明显异常 二、超声引导下前列腺系统穿刺术 （建议静卧床24小时，请临床注意观察术后并发症。）	未做												“左、右前列腺穿刺”前列腺慢性炎伴萎缩及增生。免疫组化结果：免疫组化：P63[+]34βE12[+]AMACR[-]。
53	76岁	一、前列腺超声造影检查： 前列腺右侧外腺区呈“快进同出”稍高增强 二、超声引导下前列腺系统穿刺术 （建议静卧床24小时，请临床注意观察术后并发症。）	前列腺增生；前列腺外周带异常信号灶，肿瘤伴出血可能，请结合临床。												“右前列腺穿刺”前列腺腺癌，Gleason分级4+4=8分，肿瘤占比约40%，周围见多灶高级别上皮内瘤变（HPIN）。“左前列腺穿刺”，前列腺增生性病变。免疫组化结果：右侧：P63[-]34βE12[-]AMACR[+]，左侧：P63[+]34βE12[+]AMACR[-]。
54	81岁	前列腺超声造影检查： 前列腺双侧外腺呈“快进快出”高增强 超声引导下前列腺系统穿刺术 （建议静卧床24小时，请临床注意观察术后并发症。）	前列腺增生，双侧外周带和右侧中央带异常信号，考虑前列腺Ca;右侧及中部精囊腺信号改变，腺Ca侵犯可能，请结合临床。左侧坐骨异常信号，考虑转移，建议ECT。												“左前列腺穿刺”前列腺腺癌，Gleason分级4+4=8分，可见神经束累犯。“右前列腺穿刺”前列腺腺癌，Gleason分级5+5=10分。免疫组化结果：AMACR[+]P63[-]34βE12[-]S-100神经束[+]。
55	72岁	前列腺超声造影检查： 前列腺双侧外腺呈“快进快出”高增强 超声引导下前列腺系统穿刺术 （建议静卧床24小时，请临床注意观察术后并发症。）	未做												“左前列腺穿刺”前列腺慢性炎伴增生，腺上皮细胞增大，可见小核仁，免疫组化提示基底细胞显著减少，考虑为不典型小腺体。“右前列腺穿刺”，前列腺增生性病变，局灶见小团腺体，腺上皮增大，可见小核仁，免疫组化提示基底细胞显著减少，考虑为不典型小腺体。免疫组化结果：左侧：P63小区[-]34βE12小区[-]AMACR[-]，右侧：P63小区[-]34βE12小区[-]AMACR小灶[+]。
56	78岁	一、前列腺超声造影检查： 前列腺未见明显异常增强区 二、超声引导下前列腺系统穿刺术 （建议静卧床24小时，请临床注意观察术后并发症。）	重复												“左前列腺穿刺”前列腺增生性病变，局灶腺上皮细胞增大，可见核仁，免疫组化提示基底细胞显著减少，考虑为不典型小腺体。“右前列腺穿刺”，前列腺增生性病变。免疫组化结果：左侧：P63小区[-]34βE12小区[-]AMACR小区弱[+]，右侧：P63[+]34βE12[+]AMACR[-]。
57	87岁	一、前列腺超声造影检查： 前列腺双侧外腺区呈“快进快出”高增强，提示肿瘤 二、超声引导下前列腺系统穿刺术 （建议静卧床24小时，请临床注意观察术后并发症。）	未做												“左、右前列腺穿刺”前列腺腺癌，Gleason分级4+5=9分。免疫组化结果：AMACR[+]P63[-]34βE12[-]。
58	51岁	一、前列腺超声造影检查： 前列腺未见明显异常增强区 二、超声引导下前列腺系统穿刺术 （建议静卧床24小时，请临床注意观察术后并发症。）	前列腺中央腺右侧缘前部异常信号灶，肿瘤性病变可能，请结合临床。												“左、右前列腺穿刺”前列腺增生性病变。免疫组化结果：免疫组化：P63[+]34βE12[+]AMACR[-]。
59	74岁	一、前列腺超声造影检查： 前列腺右侧外腺结节呈“快进快出”高增强 二、超声引导下前列腺系统穿刺术 （建议静卧床24小时，请临床注意观察术后并发症。）	未做												“左前列腺穿刺”前列腺腺癌，Gleason分级3+3=6分。“右前列腺穿刺”，前列腺慢性炎伴增生，局灶上皮增大，可见小核仁，免疫组化提示基底细胞显著减少，考虑不典型小腺体。免疫组化结果：左侧：P63[-]34βE12[-]AMACR[+]，右侧：P63小区[-]34βE12小区[-]AMACR[-]。
60	73岁	一、前列腺超声造影检查： 前列腺右侧外腺不均质回声区呈“快进快出”略高增强 二、超声引导下前列腺系统穿刺术 （建议静卧床24小时，请临床注意观察术后并发症。）	前列腺增生，请随访；射精管囊肿。												“左前列腺穿刺”前列腺腺癌，Gleason分级3+3=6分。“右前列腺穿刺”前列腺腺癌，Gleason分级5+3=8分。免疫组化结果：AMACR[+]P63[-]34βE12[-]。
61	65岁	一、前列腺超声造影检查： 前列腺未见明显异常增强区 二、超声引导下前列腺系统穿刺术 （建议静卧床24小时，请临床注意观察术后并发症。）	前列腺增生，前列腺中央带左侧异常强化结节灶，肿瘤待排，请结合临床及相关检查、建议穿刺。												“左前列腺穿刺”前列腺慢性炎伴增生，部分腺体增生活跃。“右前列腺穿刺”，前列腺慢性炎伴增生，小区腺泡不典型增生。免疫组化结果：左侧：P63[+]34βE12[+]AMACR少许腔面[+]，右侧：P63[+]，个别[-]34βE12[+]，个别[-]AMACR小灶腔面[+]。
62	63岁	一、前列腺超声造影检查： 前列腺未见明显异常增强区 二、超声引导下前列腺系统穿刺术 （建议静卧床24小时，请临床注意观察术后并发症。）	前列腺增生；前列腺左侧外周带T2WI小片稍低信号，请结合临床及其他检查。												“左前列腺穿刺”前列腺腺癌，Gleason分级3+3=6分。“右前列腺穿刺”，前列腺增生性病变。免疫组化结果：左侧：P63[-]34βE12[-]AMACR[+]，右侧：P63[+]34βE12[+]AMACR[-]。
63	63岁	一、前列腺超声造影检查： 前列腺未见明显异常增强区 二、超声引导下前列腺系统穿刺术 （建议静卧床24小时，请临床注意观察术后并发症。）	同上												同上
64	79岁	一、前列腺超声造影检查： 前列腺未见明显异常增强区 二、超声引导下前列腺系统穿刺术 （建议静卧床24小时，请临床注意观察术后并发症。）	前列腺增大，提示增生，请结合临床。												“左、右前列腺穿刺”前列腺增生性病变伴慢性炎。免疫组化结果：免疫组化：CK上皮[+]P63[+]34βE12[+]AMACR[-]。
65	85岁	一、前列腺超声造影检查： 前列腺右侧外腺局部呈“快进快出”高增强 二、超声引导下前列腺系统穿刺术 （建议静卧床24小时，请临床注意观察术后并发症。）	未做												“右前列腺穿刺”前列腺腺癌，Gleason分级3+4=7分。“左前列腺穿刺”，前列腺增生性病变。免疫组化结果：右侧：P63[-]34βE12[-]AMACR[+]，左侧：P63[+]34βE12[+]AMACR[-]。
66	75岁	一、前列腺超声造影检查： 前列腺左侧内外腺交界处结节呈“快进快出”稍高增强，建议穿刺活检 二、超声引导下前列腺系统穿刺术 （建议静卧床24小时，请临床注意观察术后并发症。）	前列腺增生。射精管囊肿考虑，请结合临床。												“左前列腺穿刺”前列腺增生性病变，局灶见少许小腺体增生活跃，结合免疫组化，符合前列腺腺癌，2灶，最大径均0.05cm。“右前列腺穿刺”，前列腺增生性病变，内见少许小腺体伴异型。免疫组化结果：左侧：P63[-]34βE12[-]AMACR[+]，右侧：P63[-]34βE12缺如AMACR弱[+]。
67	82岁	一、前列腺超声造影检查： 前列腺左侧外腺局部呈“快进快出”高增强 二、超声引导下前列腺系统穿刺术 （建议静卧床24小时，请临床注意观察术后并发症。）	未做												“左前列腺穿刺”前列腺增生性病变，间质少许淋巴细胞、浆细胞浸润。“右前列腺穿刺”，前列腺增生性病变。免疫组化结果：P63[+]34βE12[+]AMACR[-]。
68	67岁	前列腺增生伴多发结石 超声造影提示：前列腺未见明显异常增强区	未做												“左前列腺穿刺”前列腺腺癌，Gleason分级4+3=7分，肿瘤占比约40%。“右前列腺穿刺”，前列腺增生性病变，间质淋巴细胞、浆细胞浸润，免疫组化片内见小团异型的小腺体，符合前列腺腺癌，最大径<0.05cm。免疫组化结果：P63[-]34βE12[-]AMACR[+]。
69	67岁	前列腺增生伴多发结石 超声造影提示：前列腺未见明显异常增强区	未做												同上
70	83岁	一、前列腺超声造影检查： 前列腺未见明显异常增强区 二、超声引导下前列腺系统穿刺术 （建议静卧床24小时，请临床注意观察术后并发症。）	前列腺穿刺术后改变，左侧外周带异常信号灶;前列腺增生伴多发结石考虑，请结合临床。												“左、右前列腺穿刺”前列腺增生性病变。免疫组化结果：免疫组化：P63[+]34βE12[+]AMACR[-]。
71	63岁	一、前列腺超声造影检查： 前列腺未见明显异常增强区 二、超声引导下前列腺系统穿刺术 （建议静卧床24小时，请临床注意观察术后并发症。）	未做												“左、右前列腺穿刺”良性前列腺增生性病变。免疫组化结果：免疫组化：P63[+]34βE12[+]AMACR[-]。
72	63岁	前列腺超声造影检查： 前列腺右侧外腺区呈“快进快出”稍高增强 建议穿刺活检	未做												“左、右前列腺穿刺”前列腺良性增生性病变。免疫组化结果：免疫组化：P63[+]34βE12[+]AMACR[-]。
73	78岁	前列腺超声造影检查： 前列腺造影未见明显异常	前列腺右侧异常信号灶，肿瘤性病变待排；中央腺体左侧异常信号灶，增生结节考虑；盆腔淋巴结肿大，请结合临床及其他检查。前列腺增生。												“右前列腺穿刺”前列腺腺癌，Gleason分级3+4=7分，肿瘤占比约10%。“右前列腺穿刺”，前列腺增生性病变，部分间质内多量急慢性炎症细胞浸润伴部分腺腔积脓。免疫组化结果：右侧：P63[-]34βE12[-]AMACR[+]。
74	64岁	一、前列腺增生伴结石，超声造影提示：前列腺未见明显异常增强区 二、超声引导下前列腺系统穿刺术 （建议静卧床24小时，请临床注意观察术后并发症。）	前列腺增生改变；左侧外周带可疑强化，请结合临床及其他检查。												“左前列腺穿刺”前列腺增生性病变，局灶间质淋巴细胞、浆细胞浸润。“右前列腺穿刺”，前列腺增生性病变，局灶间质及腺体内少许淋巴细胞、浆细胞及中性粒细胞浸润。免疫组化结果：P63[+]34βE12[+]AMACR少许弱[+]。
75	59岁	前列腺增生伴结石，超声造影提示：前列腺未见明显异常增强区	前列腺增生伴钙化，射精管囊肿，请结合临床及其他检查、随访。												“右前列腺穿刺”前列腺增生性病变，局灶见小团腺体，腺上皮增生，可见小核仁，免疫组化提示基底细胞显著减少，符合高级别PIN改变。“左前列腺穿刺”，前列腺慢性炎伴增生，小灶中性粒细胞浸润。免疫组化结果：右侧：P63局灶[-]34βE12局灶[-]AMACR[-]，左侧：P63[+]34βE12[+]AMACR[-]。
76	85岁	前列腺超声造影检查： 前列腺左侧外腺局部呈“快进快出”高增强，建议穿刺活检	前列腺外周带条状强化，左侧为著，请结合临床及其他检查，建议活检。前列腺增生改变，请结合临床。												“左前列腺穿刺”前列腺腺癌，Gleason分级5+3=8分。“右前列腺穿刺”，前列腺慢性炎伴增生。免疫组化结果：左侧：P63[-]34βE12[-]AMACR[+]，右侧：P63[+]34βE12[+]AMACR[-]。
77	60岁	前列腺超声造影检查： 前列腺左侧外腺局部呈“快进快出”高增强 前列腺增生伴结石	前列腺穿刺术后改变，前列腺增生；前列腺左侧外周带异常信号灶，肿瘤性病变待排，请结合临床及穿刺检查。												“左、右前列腺穿刺”前列腺慢性炎伴增生。免疫组化结果：免疫组化：P63[+]34βE12[+]AMACR[-]。
78	73岁	一、前列腺超声造影检查： 前列腺造影未见明显异常 二、超声引导下前列腺系统穿刺术 （建议静卧床24小时，请临床注意观察术后并发症。）	膀胱颈部占位性病变，膀胱癌可能，伴两侧髂血管周围多发肿大淋巴结，请结合临床。肿瘤侵犯前列腺可能，请结合临床。												“左、右前列腺穿刺”前列腺腺癌，Gleason分级5+4=9分。免疫组化结果：AMACR[+]P63[-]34βE12[-]PSA[+]S-100神经束[+]。
79	82岁	一、前列腺超声造影检查： 前列腺造影未见明显异常 二、超声引导下前列腺系统穿刺术 （建议静卧床24小时，请临床注意观察术后并发症。）	未做												“左、右前列腺穿刺”前列腺增生性病变，局灶见小团腺体，腺上皮细胞增大，可见小核仁，免疫组化提示基底细胞显著减少，考虑为不典型小腺体。免疫组化结果：免疫组化：P63小区[-]34βE12小区[-]AMACR[-]。
80	70岁	一、前列腺超声造影检查： 前列腺右侧内腺区局部呈“快进快出”高增强 二、超声引导下前列腺系统穿刺术 （建议静卧床24小时，请临床注意观察术后并发症。）	前列腺增生，前列腺中央腺体偏右侧结节状异常信号，Ca考虑，建议穿刺活检。双侧腹股沟区多发小淋巴结。直肠管壁稍厚毛糙。												“左前列腺穿刺”前列腺腺癌，Gleason分级3+3=6分。“右前列腺穿刺”前列腺腺癌，Gleason分级4+3=7分。免疫组化结果：AMACR[+]P63[-]34βE12[-]。
81	71岁	一、前列腺超声造影检查： 前列腺增生伴结石，超声造影提示：前列腺未见明显异常增强区 前列腺区囊肿 二、超声引导下前列腺系统穿刺术 （建议静卧床24小时，请临床注意观察术后并发症。）	未做												“左、右前列腺穿刺”前列腺增生性病变。免疫组化结果：免疫组化：P63[+]34βE12[+]AMACR[-]。
82	66岁	前列腺超声造影检查： 前列腺左侧外腺局部呈“快进快出”稍高增强	前列腺穿刺术后改变，外周带信号欠均匀，请结合临床及其他检查。前列腺增生伴多发结石考虑，请结合相关检查。												“左前列腺穿刺”，前列腺增生性病变，部分间质内少许淋巴细胞、浆细胞浸润。“右前列腺穿刺”，前列腺增生性病变，部分间质内少许淋巴细胞、浆细胞浸润，个别腺体中性粒细胞浸润。免疫组化结果：P63[+]34βE12[+]AMACR[-]。
83	70岁	一、前列腺超声造影检查： 前列腺左侧外腺不均质回声区呈“快进快出”高增强 二、超声引导下前列腺系统穿刺术 （建议静卧床24小时，请临床注意观察术后并发症。）	前列腺中央腺强化不均匀，提示增生可能大；射精管囊肿表现，请结合临床。												“左前列腺穿刺”前列腺腺癌，Gleason分级4+4=8分，肿瘤占比约80%。“右前列腺穿刺”，前列腺组织，个别腺体增生略活跃，部分间质淋巴细胞、浆细胞及中性粒细胞浸润，个别腺腔积脓。免疫组化结果：左侧：P63[-]34βE12[-]AMACR[+]，右侧：P63[+]34βE12[+]AMACR[-]。
84	80岁	一、前列腺超声造影检查： 前列腺双侧外腺局部呈轻度高增强 前列腺增生伴结石 二、超声引导下前列腺系统穿刺术 （建议静卧床24小时，请临床注意观察术后并发症。）	上述征象，前列腺增生表现可符，右侧外周带可疑异常信号，建议穿刺活检。膀胱左前方稍大淋巴结显示，双侧腹股沟区多发小淋巴结。												“左、右前列腺穿刺”前列腺良性增生性病变，内见多灶中性粒细胞及淋巴细胞浸润。免疫组化结果：免疫组化：P63[+]34βE12[+]AMACR[-]。
85	64岁	一、前列腺超声造影检查： 前列腺右侧外腺局部呈“快进快出”稍高增强 二、超声引导下前列腺系统穿刺术 （建议静卧床24小时，请临床注意观察术后并发症。）	前列腺增生。												1.“左侧前列腺穿刺标本”前列腺腺癌，Gleason分级4+5=9分，肿瘤中约20%为Gleason3级。（穿刺组织6条，肿瘤占比约107%）。1.“右侧前列腺穿刺标本”前列腺腺癌，Gleason分级3+5=8分。（穿刺组织6条，肿瘤占比约5%），免疫组化结果：免疫组化：AMACR[+]P63[-]34βE12[-]。
86	82岁	前列腺超声造影检查： 前列腺左侧外腺局部呈“快进快出”高增强， 提示：前列腺CA待排	前列腺增生；左侧外周带异常信号影，考虑癌变可能大，并累及左侧中叶腺体，请结合临床。												1.“左侧前列腺穿刺标本”前列腺腺癌，Gleason分级5+4=9分。（穿刺组织4条，肿瘤占比约90%），累及神经束。1.“右侧前列腺穿刺标本”前列腺腺癌，Gleason分级3+3=6分。（穿刺组织5条，肿瘤占比约10%），免疫组化结果：免疫组化：AMACR[+]P63[-]34βE12[-]S'-100神经束[+]。
87	68岁	前列腺超声造影检查： 前列腺未见明显异常增强区	前列腺增生改变。												“左、右前列腺穿刺”前列腺慢性炎伴萎缩及增生。免疫组化结果：免疫组化：P63[+]34βE12[+]AMACR[-]。
88	71岁	前列腺超声造影检查： 前列腺未见明显异常增强区	前列腺增生。												“左、右前列腺穿刺”前列腺慢性炎伴萎缩及增生。免疫组化结果：免疫组化：P63[+]34βE12[+]AMACR[-]。
89	66岁	一、前列腺超声造影检查： 前列腺未见明显异常增强区 二、超声引导下前列腺系统穿刺术 （建议静卧床24小时，请临床注意观察术后并发症。）	前列腺增生；盆腔积液。												“左、右前列腺穿刺”前列腺慢性炎伴增生。免疫组化结果：免疫组化：P63[+]34βE12[+]AMACR少许[+]。
90	71岁	一、前列腺超声造影检查： 前列腺左侧外腺呈“快进同出”稍高增强 二、超声引导下前列腺系统穿刺术 （建议静卧床24小时，请临床注意观察术后并发症。）	上述征象，前列腺增生表现可符，其中右侧外周带可疑异常信号，癌待排，请结合穿刺检查。双侧腹股沟区多发小淋巴结。												“左前列腺穿刺”前列腺增生性病变，局灶见小团腺体，腺上皮细胞增大，可见小核仁，免疫组化提示基底细胞显著减少，考虑为不典型小腺体。“右前列腺穿刺”，前列腺增生性病变，慢性前列腺炎。免疫组化结果：左侧：P63局灶[-]34βE12局灶[-]AMACR[-]，右侧：P63[+]34βE12[+]AMACR[-]。
91	61岁	一、前列腺超声造影检查： 前列腺右侧外腺局部呈“快进快出”高增强 二、超声引导下前列腺系统穿刺术 （建议静卧床24小时，请临床注意观察术后并发症。）	前列腺轻度增生表现。												“左、右前列腺穿刺”前列腺腺癌，Gleason分级3+3=6分。免疫组化结果：AMACR[+]P63[-]34βE12[-]。
92	86岁	一、前列腺增生伴结石，超声造影提示：前列腺未见明显异常增强区 二、超声引导下前列腺系统穿刺术 （建议静卧床24小时，请临床注意观察术后并发症。）	前列腺右侧外周带异常信号灶，考虑恶性肿瘤性病变，请结合临床。												“右前列腺穿刺”前列腺腺癌，Gleason分级4+5=9分。“左前列腺穿刺”，前列腺增生性病变。免疫组化结果：右侧：P63[-]34βE12[-]AMACR[+]，左侧：P63[+]34βE12[+]AMACR[-]。
93	62岁	一、前列腺超声造影检查： 前列腺未见明显异常增强区 二、超声引导下前列腺系统穿刺术 （建议静卧床24小时，请临床注意观察术后并发症。）	未做												“左、右前列腺穿刺”前列腺增生性病变。免疫组化结果：免疫组化：P63[+]34βE12[+]AMACR[-]。
94	76岁	一、前列腺超声造影检查： 前列腺未见明显异常增强区 二、超声引导下前列腺系统穿刺术 （建议静卧床24小时，请临床注意观察术后并发症。）	前列腺增生，右侧前列腺外周带小结节影，肿瘤待排，建议进一步检查。												“右前列腺穿刺”前列腺腺癌，Gleason分级3+3=6分，肿瘤占比约5%。“左前列腺穿刺”，前列腺增生性病变。免疫组化结果：右侧：P63[-]34βE12[-]AMACR[+]，左侧：P63[+]34βE12[+]AMACR[-]。
95	66岁	前列腺超声造影检查： 前列腺未见明显异常增强区	未做												“左前列腺穿刺”前列腺慢性炎伴萎缩及增生，间质淋巴细胞、浆细胞浸润。“右前列腺穿刺”，前列腺慢性炎伴萎缩及增生，另见少许横纹肌组织。免疫组化结果：P63[+]34βE12[+]AMACR[-]。
96	59岁	前列腺超声造影检查： 前列腺未见明显异常增强区	前列腺增生。												无
97	66岁	前列腺超声造影检查： 前列腺双侧外腺呈“快进快出”高增强	未做												“右前列腺穿刺”前列腺腺癌，Gleason分级3+3=6分，肿瘤占比约5%。“左前列腺穿刺”，前列腺组织，间质炎症细胞浸润，免疫组化片内局灶见个别小腺泡增生活跃，结合免疫组化，不能排除腺癌可能（病灶太少）。免疫组化结果：右侧：P63[-]34βE12[-]AMACR[+]，左侧个别腺体：AMACR[+]P63[-]34βE12[-]。。
98	62岁	前列腺超声造影检查： 前列腺左侧内腺局部呈“快进快出”高增强	前列腺增生；前列腺穿刺术后，前列腺外周带及中央腺异常信号灶，考虑出血灶可能；左侧中央腺体内异常信号灶，请结合临床。射精管囊肿。												“左前列腺穿刺”前列腺腺癌，Gleason分级3+3=6分，肿瘤占比约5%。“右前列腺穿刺”，前列腺组织伴腺体增生，间质慢性炎伴腺腔积脓，免疫组化片内见小灶少许小腺泡增生活跃，考虑为不典型腺泡增生（组织太少）。免疫组化结果：左侧：P63[-]34βE12[-]AMACR[+]，右侧个别腺体：AMACR[+]P63[-]34βE12[-]。。
99	74岁	前列腺超声造影检查： 前列腺未见明显异常增强区	前列腺增生伴钙化，左侧外周带可疑低信号影，请结合穿刺检查结果。												“左、右前列腺穿刺”前列腺增生性病变。免疫组化结果：免疫组化：P63[+]34βE12[+]AMACR灶[+]。
100	58岁	一、前列腺超声造影检查： 前列腺造影未见明显异常 二、超声引导下前列腺系统穿刺术 （建议静卧床24小时，请临床注意观察术后并发症。）	未做												“左前列腺穿刺”前列腺增生性病变。“右前列腺穿刺”，前列腺增生性病变，局灶间质淋巴细胞、浆细胞及少许中性粒细胞浸润，个别腺腔积脓。免疫组化结果：P63[+]34βE12[+]AMACR灶性弱[+]。
101	67岁	一、前列腺超声造影检查： 前列腺造影未见明显异常 二、超声引导下前列腺系统穿刺术 （建议静卧床24小时，请临床注意观察术后并发症。）	前列腺右侧外周带近中线区异常信号，占位可能，请结合临床，建议穿刺活检。前列腺增生；前列腺右侧外周带囊性灶。												“左前列腺穿刺”前列腺增生性病变。“右前列腺穿刺”，前列腺增生性病变，局灶间质淋巴细胞、浆细胞浸润。免疫组化结果：P63[+]34βE12[+]AMACR灶[+]。
102	59岁	一、前列腺超声造影检查： 前列腺双侧外腺局部呈“快进快出”高增强 二、超声引导下前列腺系统穿刺术 （建议静卧床24小时，请临床注意观察术后并发症。）	未做												“左、右前列腺穿刺”前列腺增生性病变。免疫组化结果：免疫组化：P63[+]34βE12[+]AMACR小灶弱[+]。
103	89岁	前列腺超声造影检查： 前列腺未见明显异常增强区	未做												“左、右前列腺穿刺”前列腺萎缩伴增生。免疫组化结果：免疫组化：P63[+]34βE12[+]AMACR小灶[+]。
104	85岁	前列腺超声造影检查： 前列腺左侧内外交界处局部呈“快进快出”高增强	未做												1.“左侧前列腺穿刺标本”前列腺腺癌，Gleason分级4+5=9分。（穿刺组织5条，肿瘤占比约90%），累及神经束。1.“右侧前列腺穿刺标本”前列腺腺癌，Gleason分级5+4=9分。（穿刺组织5条，肿瘤占比约90%），累及神经束，免疫组化结果：免疫组化：AMACR[+]P63[-]34βE12[-]S-100神经束[+]。
105	82岁	前列腺超声造影检查： 前列腺左侧外腺局部呈“快进同出”高增强	前列腺偏大，前列腺左侧外周带可疑小结节影，肿瘤可能，建议必要时进一步检查。												1.“左侧前列腺穿刺标本”前列腺腺癌，Gleason分级3+4=7分。（穿刺组织5条，肿瘤占比约60%），累及神经束。“右前列腺穿刺”，前列腺慢性炎伴萎缩及增生。免疫组化结果：左侧：P63[-]34βE12[-]AMACR[+]，右侧：P63[+]34βE12[+]AMACR[-]。
106	76岁	一、前列腺超声造影检查： 前列腺右侧外腺局部呈“快进快出”高增强，CA待排 二、超声引导下前列腺系统穿刺术 （建议静卧床24小时，请临床注意观察术后并发症。）	前列腺增生表现，右侧中央腺与外周带交界处异常强化灶，占位首拟，请结合穿刺检查结果。T1WI没异常高信号影，考虑穿刺术后少许出血可能，请结合临床。												1.“右侧前列腺穿刺标本”前列腺腺癌，Gleason分级4+3=7分。（穿刺组织6条，肿瘤占比约70%），累及神经束。“左前列腺穿刺”，前列腺慢性炎伴萎缩及增生。免疫组化结果：右侧：P63[-]34βE12[-]AMACR[+]，左侧：P63[+]34βE12[+]AMACR[-]。
107	56岁	一、前列腺超声造影检查： 前列腺左侧外腺局部呈“快进快出”稍高增强，建议穿刺活检 二、超声引导下前列腺系统穿刺术 （建议静卧床24小时，请临床注意观察术后并发症。）	前列腺增生；前列腺左侧叶外周带信号减低，伴不均匀强化，炎症可能，占位待排，请结合临床，建议穿刺活检。												“左、右前列腺穿刺”前列腺增生性病变。免疫组化结果：免疫组化：P63[+]34βE12[+]AMACR[-]。
108	73岁	一、前列腺超声造影检查： 前列腺造影未见明显异常 二、超声引导下前列腺系统穿刺术 （建议静卧床24小时，请临床注意观察术后并发症。）	前列腺增生。两侧前列腺后叶T1高信号，出血可能，请结合临床。左侧外周带结节灶，考虑前列腺Ca。神经源性膀胱可能，请结合临床。												1.“左侧前列腺穿刺标本”前列腺腺癌，Gleason分级4+3=7分，肿瘤占比约20%。“右前列腺穿刺”，前列腺组织，小灶腺体增生伴少数细胞明显异型，不排除高级别上皮内瘤变（HGPIN）可能。免疫组化结果：左侧：P63[-]34βE12[-]AMACR[+]，右侧：P63[+]34βE12[+]AMACR个别腺体[+]。
109	28岁	一、前列腺超声造影检查： 前列腺左侧外腺区局部呈“快进同出”高增强 二、超声引导下前列腺系统穿刺术 （建议静卧床24小时，请临床注意观察术后并发症。）	未做												“左、右前列腺穿刺”前列腺增生性病变，伴部分腺体增生活跃。免疫组化结果：免疫组化：P63[+]34βE12[+]AMACR[-]。
110	79岁	一、前列腺超声造影检查： 前列腺右侧外腺结节呈“快进快出”高增强，CA待排 二、超声引导下前列腺系统穿刺术 （建议静卧床24小时，请临床注意观察术后并发症。）	未做												“左前列腺穿刺”前列腺腺癌，Gleason分级3+3=6分。“右前列腺穿刺”前列腺腺癌，Gleason分级4+3=7分。
111	76岁	一、前列腺超声造影检查： 前列腺造影未见明显异常 二、超声引导下前列腺系统穿刺术 （建议静卧床24小时，请临床注意观察术后并发症。）	前列腺增生。右侧前列腺周围叶内结节状低信号，肿瘤性病变可能，请结合临床。												“左、右前列腺穿刺”前列腺腺体增生。免疫组化结果：免疫组化：左侧P63[+]34βE12[+]AMACR[-]，右侧P63[+]34βE12[+]AMACR少许弱[+]
112	87岁	一、前列腺超声造影检查： 前列腺造影未见明显异常 二、超声引导下前列腺系统穿刺术 （建议静卧床24小时，请临床注意观察术后并发症。）	前列腺外周带右侧异常信号灶，请结合临床及实验室检查，必要时穿刺活检。膀胱癌均匀增厚，提示尿潴留表现。前列腺轻度增生。												1.“右侧前列腺穿刺标本”前列腺腺癌，Gleason分级3+4=7分。（穿刺组织5条，肿瘤占比约70-80%）。“左前列腺穿刺”，前列腺腺体增生。免疫组化结果：右侧：P63[-]34βE12[-]AMACR[+]S-100神经束[+]，左侧：P63[+]34βE12[+]AMACR[-]。
113	75岁	一、前列腺增生伴结石，超声造影：前列腺未见明显异常增强区 二、MRI结合超声虚拟导航引导下前列腺系统穿刺术 （建议静卧床24小时，请临床注意观察术后并发症。）	上述征象，前列腺增生表现可符，左侧外周带局灶性异常强化结节，癌待排，请结合临床相关检查，必要时穿刺检查；双侧腹股沟区多发小淋巴结。												“左前列腺穿刺”前列腺腺癌，Gleason分级3+3=6分。“右前列腺穿刺”，前列腺增生性病变。免疫组化结果：左侧：P63[-]34βE12[-]AMACR[+]，右侧：P63[+]34βE12[+]AMACR[-]。
114	77岁	前列腺超声造影检查： 前列腺右侧外腺局部呈“快进快出”高增强，建议穿刺活检	前列腺穿刺术后，右侧外腺局部术后改变考虑；前列腺中央腺增生考虑，前列腺左侧外周带及中央腺体前部异常信号伴明显不均匀强化，癌待排，请结合穿刺检查结果；左侧精囊腺少许出血信号可能；盆腔少量积液。												“左、右前列腺穿刺”前列腺腺癌，Gleason分级4+3=7分。免疫组化结果：AMACR[+]P63[-]34βE12[-]。
115	81岁	一、前列腺超声造影检查： 前列腺未见明显异常增强区 二、超声引导下前列腺系统穿刺术 （建议静卧床24小时，请临床注意观察术后并发症。） 附见：膀胱占位，建议超声造影	前列腺增生表现，外周带及右侧精囊腺T1WI信号异常，炎性改变可能，请结合临床；射精管小囊肿考虑。												“左、右前列腺穿刺”前列腺增生性病变，慢性前列腺炎。免疫组化结果：免疫组化：P63[+]34βE12[+]AMACR[-]。
116	62岁	一 前列腺增生伴结石，超声造影提示：前列腺未见明显异常增强区 二 超声引导下前列腺系统穿刺术 （建议静卧床24小时，请临床注意观察术后并发症。）	前列腺偏大；前列腺中央腺小结节状强化影，考虑良性病变，请结合临床，必要时穿刺活检。												“左、右前列腺穿刺”前列腺增生性病变。免疫组化结果：免疫组化：P63[+]34βE12[+]AMACR[-]。
117	61岁	一、前列腺超声造影检查： 前列腺未见明显异常增强区 二、超声引导下前列腺系统穿刺术 （建议静卧床24小时，请临床注意观察术后并发症。）	未做												“左、右前列腺穿刺”前列腺增生性病变，局灶间质内淋巴细胞、浆细胞及中性粒细胞浸润伴个别腺腔积脓。免疫组化结果：免疫组化：P63[+]34βE12[+]AMACR灶性弱[+]。
118	79岁	一、前列腺超声造影检查： 前列腺左侧外腺局部呈“快进快出”高增强 二、超声引导下前列腺系统穿刺术 （建议静卧床24小时，请临床注意观察术后并发症。）	前列腺穿刺术后改变；前列腺左侧外周带占位，前列腺Ca可能性大，伴左侧精囊腺侵犯考虑，盆腔两侧肿大淋巴结待排，肠管断面尚不能除外，请结合临床及其他检查。前列腺增生。												“左、右前列腺穿刺”前列腺增生性病变伴小灶淋巴细胞浸润。
119	62岁	一、前列腺超声造影检查： 前列腺左侧内腺区结节呈“快进快出”高增强 二、超声引导下前列腺系统穿刺术 （建议静卧床24小时，请临床注意观察术后并发症。）	未做												“左、右前列腺穿刺”前列腺萎缩伴增生，间质淋巴细胞灶状浸润，小区腺腔内中性粒细胞脓肿形成。免疫组化结果：免疫组化：P63[+]34βE12[+]AMACR灶区[+]。
120	82岁	一、前列腺超声造影检查： 前列腺双侧内外腺交界处结节呈“快进快出”高增强，建议穿刺活检 二、超声引导下前列腺系统穿刺术 （建议静卧床24小时，请临床注意观察术后并发症。）	前列腺增生。中央腺体及外周带多大短T1高信号影，考虑穿刺后出血改变，请结合临床。												“左、右前列腺穿刺”前列腺萎缩伴增生。免疫组化结果：免疫组化：P63[+]34βE12[+]AMACR[-]。 “前列腺HOLEP术标本”前列腺腺癌，Gleason分级3+4=7分。免疫：AMACR[+]P63[-]34βE12[-]。
121	82岁	一、前列腺超声造影检查： 前列腺未见明显异常增强区 二、超声引导下前列腺系统穿刺术 （建议静卧床24小时，请临床注意观察术后并发症。）	未做												“左前列腺穿刺”前列腺慢性炎伴增生。“右前列腺穿刺”，前列腺增慢性炎伴增生，散在中性粒细胞浸润。免疫组化结果：P63[+]34βE12[+]AMACR[-]。
122	63岁	一、前列腺超声造影检查： 前列腺左侧外腺区结节呈“快进快出”高增强 二、超声引导下前列腺系统穿刺术 （建议静卧床24小时，请临床注意观察术后并发症。）	左侧前列腺外周带稍短T2信号改变，有所强化，请结合临床PSA检查及建议穿刺活检；伴盆腔积液。												“左前列腺穿刺”前列腺慢性炎伴增生，小灶腔内积脓。“右前列腺穿刺”，前列腺慢性炎伴增生。免疫组化结果：右侧：P63[+]34βE12[+]AMACR少许腔面[+]，左侧：P63[+]34βE12[+]AMACR[-]。
123	72岁	前列腺超声造影检查： 前列腺右侧外腺结节呈“快进快出”高增强 提示：前列腺Ca首先考虑	前列腺右侧外周带异常信号灶，前列腺Ca需考虑，建议穿刺活检。前列腺增生。												“左前列腺穿刺”前列腺慢性炎伴增生，个别腔内积脓。“右前列腺穿刺”，前列腺慢性炎伴增生。免疫组化结果：P63[+]34βE12[+]AMACR少许腔面[+]。
124	78岁	前列腺超声造影检查： 前列腺未见明显异常增强区	未做												“左前列腺穿刺”前列腺慢性炎伴增生，个别腺管高级别上皮内瘤变（HGPIN）。“右前列腺穿刺”，前列腺慢性炎伴增生，部分腺管增生活跃。免疫组化结果：P63[+]34βE12[+]AMACR少许腔面[+]。
125	67岁	一、前列腺超声造影检查： 前列腺未见明显异常增强区 二、超声引导下前列腺系统穿刺术 （建议静卧床24小时，请临床注意观察术后并发症。）	前列腺增大，提示增生；双侧外周带异常信号，考虑穿刺后出血，请结合临床考虑。												“左前列腺穿刺”前列腺慢性炎伴增生。“右前列腺穿刺”，前列腺慢性炎伴增生，个别腺体增生活跃。免疫组化结果：右侧小灶：P63[+]34βE12[+]AMACR[+]，左侧：P63[+]34βE12[+]AMACR个别[+]。
126	73岁	一、前列腺增生伴结石，超声造影提示：前列腺未见明显异常增强区 二、超声引导下前列腺系统穿刺术 （建议静卧床24小时，请临床注意观察术后并发症。）	未做												“左前列腺穿刺”前列腺组织内散在少许不规则的小腺体，个别腔内见结晶体，结合免疫组化，符合不典型小腺泡增生。“右前列腺穿刺”，前列腺组织，部分腺体增生活跃。免疫组化结果：右侧：P63[+]34βE12[+]AMACR灶性[+]，左侧：P63散在少许小腺体[-]34βE12散在少许小腺体[-]AMACR弱[+]。
127	61岁	一、前列腺增生伴结石，超声造影提示：前列腺未见明显异常增强区 二、超声引导下前列腺系统穿刺术 （建议静卧床24小时，请临床注意观察术后并发症。）	双侧前列腺穿刺术后，双侧外周带短T1信号影，考虑积血。右侧前列腺周围叶结节影，前列腺癌可能，请结合临床。前列腺增生。												“右前列腺穿刺”前列腺腺癌，Gleason分级3+3=6分，肿瘤占比5-10%。“左前列腺穿刺”，前列腺增生性病变，局灶间质少许淋巴细胞、浆细胞浸润。免疫组化结果：右侧：P63[-]34βE12[-]AMACR[+]，左侧：P63[+]34βE12[+]AMACR[-]。
128	61岁	前列腺超声造影检查：前列腺造影未见明显异常	前列腺穿刺术后改变；左侧外周带异常信号，请结合临床及其他检查。前列腺增生。												“左前列腺穿刺”前列腺腺癌，Gleason分级3+3=6分。“右前列腺穿刺”，前列腺增生性病变。免疫组化结果：左侧：P63[-]34βE12[-]AMACR[+]。
129	58岁	一、前列腺超声造影检查： 前列腺造影未见明显异常 二、超声引导下前列腺系统穿刺术 （建议静卧床24小时，请临床注意观察术后并发症。）	前列腺增生考虑，前列腺中央腺增大，突入膀胱，强化明显，必要时穿刺活检。												“左、右前列腺穿刺”前列腺良性增生性改变，内见较多中性粒、淋巴细胞浸润。
130	62岁	一、前列腺超声造影检查： 前列腺未见明显异常增强区 二、超声引导下前列腺系统穿刺术 （建议静卧床24小时，请临床注意观察术后并发症。）	前列腺增生改变，请结合临床。												“左、右前列腺穿刺”前列腺慢性炎伴增生。免疫组化结果：免疫组化：P63[+]34βE12[+]AMACR[-]。
131	73岁	一、前列腺超声造影检查： 前列腺未见明显异常增强区 二、超声引导下前列腺系统穿刺术 （建议静卧床24小时，请临床注意观察术后并发症。）	左侧前列腺后叶结节灶，请结合临床。前列腺右侧叶信号欠规则。两侧前列腺T1多发斑点状高信号，出血灶可能，请结合临床。												1.“左侧前列腺穿刺标本”前列腺腺癌，Gleason分级3+3=6分，肿瘤占比约15%。1.“右侧前列腺穿刺标本”前列腺腺癌，Gleason分级3+3=6分，肿瘤占比约5%。免疫组化结果：免疫组化：AMACR[+]P63[-]34βE12[-]。
132	86岁	一、前列腺超声造影检查： 前列腺未见明显异常增强区 二、超声引导下前列腺系统穿刺术 （建议静卧床24小时，请临床注意观察术后并发症。）	前列腺增生，右侧肿大明显，右侧后缘结节影，占位待排，外周带异常信号，穿刺术后改变可能；盆腔、两侧腹股沟区多发淋巴结肿大；请结合临床及其他检查。												“右前列腺穿刺”前列腺腺癌，Gleason分级4+4=8分，肿瘤占比约80%。“左前列腺穿刺”，前列腺增生性病变。免疫组化结果：右侧：P63[-]34βE12[-]AMACR[+]，左侧：P63[+]34βE12[+]AMACR小灶弱[+]。
133	83岁	一、前列腺超声造影检查： 前列腺左侧外腺区呈“快进快出”高增强 二、超声引导下前列腺系统穿刺术 （建议静卧床24小时，请临床注意观察术后并发症。）	前列腺增生可符；左侧外周带前列腺癌考虑，伴左侧盆腔侧壁淋巴结转移，请结合相关检查；右侧腹股沟稍大淋巴结影，结合临床。												“左前列腺穿刺”前列腺腺癌，Gleason分级4+3=7分。“右前列腺穿刺”，前列腺慢性炎伴多发增生。免疫组化结果：左侧：P63[-]34βE12[-]AMACR[+]，右侧：P63[+]34βE12[+]AMACR[-]。
134	71岁	一、前列腺超声造影检查： 前列腺未见明显异常增强区 二、超声引导下前列腺系统穿刺术 （建议静卧床24小时，请临床注意观察术后并发症。）	1.前列腺增生可符；中央腺右侧份异常信号结节灶，占位待排，局部膀胱壁受累可疑，建议穿刺活检；2.右侧外周带近精囊三角区小囊性灶，良性病变可能性大。												“左、右前列腺穿刺”前列腺萎缩伴增生。免疫组化结果：免疫组化：P63[+]34βE12[+]AMACR小灶弱[+]。
135	56岁	一、前列腺超声造影检查： 前列腺未见明显异常增强区 二、超声引导下前列腺系统穿刺术 （建议静卧床24小时，请临床注意观察术后并发症。）	未做												“左前列腺穿刺”前列腺增生性病变伴小灶腺体增生活跃，局灶间质淋巴细胞、浆细胞及中性粒细胞浸润。“右前列腺穿刺”，前列腺增生性病变。免疫组化结果：左侧：P63[+]34βE12[+]AMACR灶[+]，右侧：P63[+]34βE12[+]AMACR[-]。
136	76岁	前列腺增生伴结石，超声造影提示：前列腺未见明显异常增强区	前列腺增生。												“左前列腺穿刺”前列腺增生性病变伴间质淋巴细胞、浆细胞及少许中性粒细胞浸润。“右前列腺穿刺”，前列腺增生性病变伴小灶腺体增生略活跃，间质淋巴细胞、浆细胞及中性粒细胞浸润；另见少许横纹肌组织。免疫组化结果：P63[+]34βE12[+]AMACR[-]。
137	70岁	前列腺超声造影检查： 前列腺未见明显异常增强区	前列腺中央腺右前部异常强化结节，请结合临床，必要时穿刺活检。膀胱前壁毛糙伴增厚，请结合临床。射精管囊肿考虑。												“左、右前列腺穿刺”前列腺增生性病变。免疫组化结果：免疫组化：P63[+]34βE12[+]AMACR[-]。
138	77岁	前列腺超声造影检查： 前列腺外腺局部呈“快进快出”高增强	前列腺上部左侧结节状异常信号，考虑前列腺癌，请结合临床及其他检查。前列腺左侧外周带异常信号，考虑穿刺后出血改变。前列腺增生。												“左、右前列腺穿刺”前列腺腺癌，Gleason分级3+4=7分。免疫组化结果：AMACR[+]P63[-]34βE12[-]。
139	60岁	一、前列腺超声造影检查： 前列腺左侧外腺区结节呈“快进快出”高增强 二、超声引导下前列腺系统穿刺术 （建议静卧床24小时，请临床注意观察术后并发症。）	上述征象，前列腺增生表现，左侧外周带异常强化，Ca待排，请结合临床及相关检查，建议穿刺检查。双侧腹股沟区多发小淋巴结。												“左前列腺穿刺”前列腺慢性炎伴腺体增生，个别腺体增生活跃，间质中性粒细胞浸润，腺腔积脓及炎性渗出。“右前列腺穿刺”，前列腺组织腺体增生，个别腺腔积脓。免疫组化结果：P63[+]34βE12[+]AMACR[-]。
140	71岁	前列腺增生伴结石，超声造影提示：前列腺未见明显异常增强区	前列腺增生考虑，外周带高信号影，考虑穿刺术后改变，请结合临床。												“左、右前列腺穿刺”前列腺增生性病变。免疫组化结果：免疫组化：P63[+]34βE12[+]AMACR[-]。
141	55岁	前列腺增生伴结石，超声造影提示：前列腺未见明显异常增强区	上述征象，考虑前列腺增生，其中两外侧叶后部连接处结节不除外占位，建议活检。												“左前列腺穿刺”前列腺组织，内见小团腺体，腺上皮细胞增大，可见小核仁，免疫组化提示基底细胞显著减少，考虑为不典型小腺体。“右前列腺穿刺”，前列腺增生性病变。免疫组化结果：左侧：P63小区[-]34βE12小区[-]AMACR小灶弱[+]，右侧：P63[+]34βE12[+]AMACR[-]。
142	65岁	前列腺超声造影检查： 前列腺双侧外腺局部呈“快进快出”高增强	前列腺肥大。左侧前列腺后叶出血，占位性病变不排除，请结合临床。右侧前列腺结节灶，请结合临床。												“左前列腺穿刺”前列腺腺癌，Gleason分级3+3=6分。“右前列腺穿刺”，前列腺组织，内见小团腺体，腺上皮细胞增大，可见小核仁，免疫组化提示基底细胞显著减少，考虑为不典型小腺体。免疫组化结果：左侧：P63[-]34βE12[-]AMACR[+]，右侧：P63小区[-]34βE12小区[-]AMACR[-]。
143	71岁	前列腺超声造影检查： 前列腺右侧外腺局部呈“快进快出”高增强	未做												“左、右前列腺穿刺”前列腺慢性炎伴腺体增生，灶性腺体增生活跃，符合高级别上皮内瘤变（HGPUN）。免疫组化结果：免疫组化：P63[+]34βE12[+]AMACR灶[+]。
144	45岁	前列腺超声造影检查： 前列腺左侧外腺结节呈“快进快出”高增强	前列腺MR平扫+增强未见明显异常。												“左、右前列腺穿刺”前列腺增生性病变，慢性前列腺炎。免疫组化结果：免疫组化：P63[+]34βE12[+]AMACR[-]。
145	61岁	前列腺超声造影检查： 前列腺左侧外腺局部呈“快进快出”高增强，建议穿刺活检	前列腺增生，外周带信号不均，左侧为著稍短T2信号改变，慢性炎症可能，前列腺癌待排，建议随访或穿刺活检。												“左、右前列腺穿刺”前列腺增生性病变。免疫组化结果：免疫组化：P63[+]34βE12[+]AMACR[-]。
146	82岁	前列腺增生伴结石，超声造影提示：前列腺未见明显异常增强区	未做												“左、右前列腺穿刺”前列腺增生性病变。免疫组化结果：免疫组化：P63[+]34βE12[+]AMACR[-]。
147	57岁	超声造影检查 前列腺外腺局部呈“同进快退”稍高增强，建议穿刺活检 前列腺增生伴多发结石	前列腺外周带左叶前下部异常信号，考虑前列腺癌可能大，请结合其他检查。前列腺增生。												“左、右前列腺穿刺”前列腺增生性病变，慢性前列腺炎。免疫组化结果：免疫组化：P63[+]34βE12[+]AMACR[-]。
148	63岁	前列腺超声造影检查： 前列腺右侧外腺局部呈“快进快出”高增强，建议穿刺活检	未做												“右前列腺穿刺”前列腺增生性病变，局灶见小团腺体，腺上皮细胞增大，可见小核仁，免疫组化提示基底细胞显著减少，考虑为不典型小腺体。“左前列腺穿刺”，前列腺增生性病变。免疫组化结果：右侧：P63小区[-]34βE12小区[-]AMACR[-]，左侧：P63[+]34βE12[+]AMACR[-]。
149	73岁	一、前列腺超声造影检查： 前列腺左侧外腺局部呈“快进快出”高增强 二、超声引导下前列腺系统穿刺术 （建议静卧床24小时，请临床注意观察术后并发症。）	前列腺左侧外周带异常信号灶，肿瘤性病变可能性大，建议进一步穿刺检查。												1.“左侧前列腺穿刺标本”前列腺腺癌，Gleason分级4+5=9分。（穿刺组织5条，肿瘤占比约80%）。1.“右侧前列腺穿刺标本”前列腺腺体增生，内见少许非典型小腺泡增生（ASAP）。（穿刺组织5条，肿瘤占比约5%），免疫组化结果：免疫组化：左侧AMACR[+]P63[-]34βE12[-]，右侧：ASAP区：AMACR[+]P63[-]34βE12[-]。。
150	60岁	超声引导下前列腺系统穿刺术 （建议静卧床24小时，请临床注意观察术后并发症。）	未做												“左、右前列腺穿刺”前列腺腺体萎缩伴增生。免疫组化结果：免疫组化：P63[+]34βE12[+]AMACR[-]。
151	66岁	前列腺超声造影检查： 前列腺左侧外腺局部呈“快进快出”高增强	上述征象，考虑前列腺增生，局部出血可能，请结合临床。前列腺两外侧叶信号异常，考虑炎性病变可能，请结合临床。												“左、右前列腺穿刺”前列腺腺体增生。免疫组化结果：免疫组化：P63[+]34βE12[+]AMACR[-]。
152	60岁	肝胆脾胰未见明显异常 双肾多发小结石 前列腺增生伴多发结石，左侧内外腺交界处结节 前列腺超声造影检查： 前列腺左侧内外腺交界区结节呈“快进快出”高增强 占位考虑	未做												同151
153	74岁	一、前列腺增生伴结石，超声造影提示：前列腺未见明显异常增强区 二、超声引导下前列腺系统穿刺术 （建议静卧床24小时，请临床注意观察术后并发症。）	前列腺增生考虑，左侧前列腺外周带局部稍短T2信号，增强扫描未见异常强化，请结合临床及随访或穿刺活检；射精管囊肿。												“左前列腺穿刺”前列腺慢性炎伴增生，小灶腔内积脓。“右前列腺穿刺”，前列腺慢性炎，小灶腺体增生活跃。免疫组化结果：左侧：P63[-]34βE12[-]AMACR[+]，右侧：P63局灶减少34βE12局灶减少AMACR少许腔面[+]。
154	68岁	一、前列腺增生伴结石，超声造影提示：前列腺未见明显异常增强区 二、超声引导下前列腺系统穿刺术 （建议静卧床24小时，请临床注意观察术后并发症。）	前列腺外周带左侧异常信号灶，两侧精囊腺信号异常；炎性病变不排除请结合临床。盆腔少量积液。												“左、右前列腺穿刺”前列腺慢性炎、萎缩伴增生。免疫组化结果：免疫组化：P63[+]34βE12[+]AMACR[-]。
155	68岁	前列腺超声造影检查： 前列腺未见明显异常增强区	前列腺增大，提示增生，请结合相关检查。												“左前列腺穿刺”前列腺慢性炎伴小灶积脓。“右前列腺穿刺”，前列腺慢性炎伴增生。免疫组化结果：P63[+]34βE12[+]AMACR少许腔面[+]。
156	68岁	超声引导下前列腺系统穿刺术 （建议静卧床24小时，请临床注意观察术后并发症。）	同上												同上
157	75岁	左后颈部所指处皮下低回声结节 ,性质待定，建议必要时穿刺活检 前列腺超声造影检查： 前列腺未见明显异常增强区	未做												无
158	64岁	前列腺增生伴结石，超声造影提示：前列腺未见明显异常增强区	未做												“左、右前列腺穿刺”前列腺良性增生性病变。
159	64岁	超声引导下前列腺系统穿刺术 （建议静卧床24小时，请临床注意观察术后并发症。）	未做												同上
160	84岁	一、前列腺超声造影检查： 前列腺未见明显异常增强区 二、超声引导下前列腺系统穿刺术 （建议静卧床24小时，请临床注意观察术后并发症。）	前列腺增生。左侧外周带异常信号灶，考虑肿瘤性病变可能，建议进一步穿刺检查。												“左前列腺穿刺”前列腺腺癌，Gleason分级3+3=6分，肿瘤占比约50%。“右前列腺穿刺”前列腺腺癌，Gleason分级3+3=6分，肿瘤占比约15%。免疫组化结果：AMACR[+]P63[-]34βE12[-]。
161	63岁	一、前列腺超声造影检查： 前列腺造影未见明显异常强化区 二、超声引导下前列腺系统穿刺术 （建议静卧床24小时，请临床注意观察术后并发症。）	前列腺增生，左侧外周带T2信号减低，建议必要时穿刺活检。射精管囊肿。												“左、右前列腺穿刺”前列腺增生性病变，慢性前列腺炎。免疫组化结果：免疫组化：P63[+]34βE12[+]AMACR[-]。
162	65岁	一、前列腺超声造影检查： 前列腺造影未见明显异常 二、超声引导下前列腺系统穿刺术 （建议静卧床24小时，请临床注意观察术后并发症。）	未做												“左、右前列腺穿刺”前列腺增生性病变。免疫组化结果：免疫组化：P63[+]34βE12[+]AMACR[-]。
163	61岁	前列腺超声造影未见明显异常强化区	未做												“左、右前列腺穿刺”前列腺增生性病变。免疫组化结果：免疫组化：P63[+]34βE12[+]AMACR小灶弱[+]。
164	71岁	一、前列腺超声造影检查： 前列腺右侧外腺局部呈“快进快出”稍高增强 二、超声引导下前列腺系统穿刺术 （建议静卧床24小时，请临床注意观察术后并发症。）	未做												“左、右前列腺穿刺”前列腺组织，右侧小灶腺上皮增生伴间质淋巴、浆细胞浸润。免疫组化结果：免疫组化：P63[+]34βE12[+]AMACR[-]。
165	51岁	一、前列腺外腺呈“同进快退”等增强， 二、超声引导下前列腺系统穿刺术 （建议静卧床24小时，请临床注意观察术后并发症。）	前列腺右侧外周带及移行带局部异常强化灶，肿瘤性病变不除外，请结合临床；前列腺穿刺术后，左侧外周带及右侧精囊腺出血可能；盆底少许小淋巴结。												“右前列腺穿刺”前列腺腺癌，Gleason分级3+3=6分。“左前列腺穿刺”，前列腺增生性病变。免疫组化结果：右侧：P63[-]34βE12[-]AMACR[+]，左侧：P63[+]34βE12[+]AMACR[-]。
166	64岁	前列腺超声造影检查： 前列腺右侧外腺局部呈“快进快出”高增强，CA待排	前列腺轻度增生，前列腺右侧外周带异常信号灶，考虑肿瘤不除外，建议穿刺活检。												“左前列腺穿刺”前列腺腺癌，Gleason分级3+3=6分。“右前列腺穿刺”前列腺腺癌，Gleason分级5+3=8分。免疫组化结果：AMACR[+]P63[-]34βE12[-]S-100示“右侧”有神经束累犯。
167	86岁	前列腺超声造影检查： 前列腺造影未见明显异常	前列腺中央腺及右侧外周带多发异常信号，肿瘤性病变待排，请结合临床。												“左、右前列腺穿刺”前列腺腺癌，Gleason分级3+3=6分。免疫组化结果：AMACR[+]P63[-]34βE12[-]。
168	66岁	一、前列腺超声造影检查： 前列腺未见明显异常增强区 二、超声引导下前列腺系统穿刺术 （建议静卧床24小时，请临床注意观察术后并发症。）	未做												“左前列腺穿刺”前列腺腺癌，Gleason分级4+4=8分，肿瘤占比约90%，可见神经侵犯。“右前列腺穿刺”前列腺腺癌，Gleason分级4+4=8分，肿瘤占比约90%。免疫组化结果：AMACR[+]P63[-]34βE12[-]S100神经束[+]。
169	83岁	一、前列腺超声造影检查： 前列腺未见明显异常增强区 二、超声引导下前列腺系统穿刺术 （建议静卧床24小时，请临床注意观察术后并发症。）	未做												“右前列腺穿刺”前列腺组织。局灶上皮增生较活跃。“左前列腺穿刺”，前列腺组织伴间质纤维组织增生。免疫组化结果：P63[+]34βE12[+]AMACR少许弱[+]。
170	65岁	超声引导下前列腺系统穿刺术 （建议静卧床24小时，请临床注意观察术后并发症。）	未做												“右前列腺穿刺”前列腺腺癌，Gleason分级3+3=6分。“左前列腺穿刺”，前列腺增生性病变。免疫组化结果：右侧：P63[-]34βE12[-]AMACR[+]，左侧：P63[+]34βE12[+]AMACR[-]。
171	65岁	前列腺超声造影检查： 前列腺右侧外腺区低回声结节呈“快进快出”稍高增强	未做												同上
172	78岁	前列腺超声造影检查： 前列腺未见明显异常增强区	未做												“左、右前列腺穿刺”前列腺增生性病变。免疫组化结果：免疫组化：P63[+]34βE12[+]AMACR[-]。
173	73岁	一、前列腺超声造影检查： 前列腺未见明显异常增强区 二、超声引导下前列腺系统穿刺术 （建议静卧床24小时，请临床注意观察术后并发症。）	未做												“左、右前列腺穿刺”前列腺增生性病变，慢性前列腺炎。免疫组化结果：免疫组化：P63[+]34βE12[+]AMACR[-]。
174	78岁	一、前列腺超声造影检查： 前列腺未见明显异常增强区 二、超声引导下前列腺系统穿刺术 （建议静卧床24小时，请临床注意观察术后并发症。）	未做												“右前列腺穿刺”前列腺腺癌，Gleason分级4+3=7分，穿刺组织6条，肿瘤占比约80%。“左前列腺穿刺”，前列腺慢性炎伴增生。免疫组化结果：右侧：P63[-]34βE12[-]AMACR[+]，左侧：P63[+]34βE12[+]AMACR[-]。
175	75岁	一、前列腺超声造影检查： 前列腺未见明显异常增强区 二、超声引导下前列腺系统穿刺术 （建议静卧床24小时，请临床注意观察术后并发症。）	前列腺左侧外周带短T2信号影，建议随访。射精管囊肿。												“左前列腺穿刺”前列腺慢性炎伴增生，小灶腺体增生活跃伴空泡样变性。“右前列腺穿刺”，前列腺慢性炎伴增生。免疫组化结果：P63[+]34βE12[+]AMACR[-]。
176	65岁	一、前列腺超声造影检查： 前列腺未见明显异常增强区 二、超声引导下前列腺系统穿刺术 （建议静卧床24小时，请临床注意观察术后并发症。）	前列腺增生；中央腺体内较大结节，建议随访，请结合临床。												“左、右前列腺穿刺”前列腺慢性炎伴腺体增生，腺腔内积脓。免疫组化结果：免疫组化：P63[+]34βE12[+]AMACR[-]。
177	75岁	一、前列腺超声造影检查： 前列腺未见明显异常增强区 二、超声引导下前列腺系统穿刺术 （建议静卧床24小时，请临床注意观察术后并发症。）	未做												“左、右前列腺穿刺”前列腺慢性炎伴增生。免疫组化结果：免疫组化：P63[+]34βE12[+]AMACR[-]。
178	78岁	一、前列腺超声造影检查： 前列腺未见明显异常增强区 二、超声引导下前列腺系统穿刺术 （建议静卧床24小时，请临床注意观察术后并发症。）	未做												同175
179	68岁	一、前列腺增生伴结石，超声造影提示：前列腺未见明显异常增强区 二、超声引导下前列腺系统穿刺术 （建议静卧床24小时，请临床注意观察术后并发症。）	前列腺增生，左侧前列腺外周带小结节影及右后外周带区小片弥散稍高信号影，占位不除外，建议进一步检查。												“左、右前列腺穿刺”前列腺良性增生症。免疫组化结果：免疫组化：P63[+]34βE12[+]AMACR[-]。
180	73岁	一、前列腺超声造影检查： 前列腺未见明显异常增强区 二、超声引导下前列腺系统穿刺术 （建议静卧床24小时，请临床注意观察术后并发症。）	前列腺增生，伴钙化可能，请结合临床及相关检查。												“左、右前列腺穿刺”前列腺萎缩伴增生。免疫组化结果：免疫组化：P63[+]34βE12[+]AMACR[-]。
181	63岁	一、前列腺超声造影检查： 前列腺未见明显异常增强区 二、超声引导下前列腺系统穿刺术 （建议静卧床24小时，请临床注意观察术后并发症。）	前列腺增生表现，左侧外周带少许T2低信号，请结合穿刺检查结果。												“左、右前列腺穿刺”前列腺慢性炎伴腺体增生。免疫组化结果：免疫组化：P63[+]34βE12[+]AMACR[-]。
182	71岁	一、前列腺增生伴结石，超声造影提示：前列腺未见明显异常增强区 二、超声引导下前列腺系统穿刺术	未做												“左、右前列腺穿刺”前列腺良性增生症。免疫组化结果：免疫组化：P63[+]34βE12[+]AMACR[-]。
183	70岁	一、前列腺超声造影检查： 前列腺未见明显异常增强区 二、超声引导下前列腺系统穿刺术 （建议静卧床24小时，请临床注意观察术后并发症。）	前列腺增生，外周带右后侧斑片明显强化灶，炎性病变可能性大，占位不完全除外，请结合临床及相关检查。盆腔右侧小淋巴结影。												“左前列腺穿刺”前列腺腺癌，Gleason分级3+3=6分。“右前列腺穿刺”前列腺腺癌，Gleason分级4+4=8分。免疫组化结果：AMACR[+]P63[-]34βE12[-]。
184	77岁	一、前列腺超声造影检查： 前列腺未见明显异常增强区 二、超声引导下前列腺系统穿刺术 （建议静卧床24小时，请临床注意观察术后并发症。）	未做												“左、右前列腺穿刺”前列腺增生性病变。免疫组化结果：免疫组化：P63[+]34βE12[+]AMACR[-]。
185	79岁	一、前列腺超声造影检查： 前列腺外腺局部呈“快进快出”高增强 二、超声引导下前列腺系统穿刺术 （建议静卧床24小时，请临床注意观察术后并发症。）	前列腺增生表现，其后部及左侧外周带异常强化，Ca考虑，请结合穿刺病理结果。双侧精囊腺T2信号减低，慢性精囊炎首拟，请结合临床。附见：右侧坐骨结节异常信号伴强化，转移性病变待排，请结合临床。												“左、右前列腺穿刺”前列腺腺癌，Gleason分级4+3=7分。免疫组化结果：AMACR[+]P63[-]34βE12[-]。
186	65岁	一、前列腺超声造影检查： 前列腺未见明显异常增强区 二、超声引导下前列腺系统穿刺术 （建议静卧床24小时，请临床注意观察术后并发症。）	前列腺增生，外周带右前部强化灶，建议穿刺检查。												“左、右前列腺穿刺”前列腺增生性病变。免疫组化结果：免疫组化：P63[+]34βE12[+]AMACR[-]。
187	91岁	一、前列腺超声造影检查： 前列腺未见明显异常增强区 二、超声引导下前列腺系统穿刺术 （建议静卧床24小时，请临床注意观察术后并发症。）	前列腺增生表现，伴散在小出血灶，考虑穿刺后改变，另中央腺体偏右前部异常信号，癌待排，请结合临床。双侧腹股沟区多发小淋巴结显示。												“左、右前列腺穿刺”前列腺增生性病变。免疫组化结果：免疫组化：P63[+]34βE12[+]AMACR[-]。
188	67岁	一、前列腺超声造影检查： 前列腺外腺局部呈“快进快出”高增强 二、超声引导下前列腺系统穿刺术 （建议静卧床24小时，请临床注意观察术后并发症。）	前列腺左侧外周带较饱满，请结合临床。前列腺增生。												“左、右前列腺穿刺”前列腺增生性病变。免疫组化结果：免疫组化：P63[+]34βE12[+]AMACR[-]。
189	67岁	一、前列腺超声造影检查： 前列腺外腺局部呈“快进快出”高增强 二、超声引导下前列腺系统穿刺术 （建议静卧床24小时，请临床注意观察术后并发症。）	同上												同上
190	68岁	一、前列腺超声造影检查： 前列腺未见明显异常增强区 二、超声引导下前列腺系统穿刺术 （建议静卧床24小时，请临床注意观察术后并发症。）	前列腺增生。												“左、右前列腺穿刺”前列腺慢性炎，间质多量淋巴细胞、组织细胞及灶性中性粒细胞浸润。免疫组化结果：免疫组化：34βE12[+]AMACR[-]CD20间质淋巴细胞[+]CD3间质淋巴细胞[+]CD68组织细胞[+]。
191	69岁	前列腺超声造影检查： 前列腺外腺局部呈“快进快出”高增强	前列腺轻度增生，前列腺右侧外周带结节异常信号，符合前列腺Ca，请结合临床。												“右前列腺穿刺”前列腺腺癌，Gleason分级4+3=7分。“左前列腺穿刺”，前列腺局灶腺体有异型伴基底细胞不完整，考虑为不典型小腺泡。免疫组化结果：右侧：P63[-]34βE12[-]AMACR[+]，左侧：P63局灶[-]34βE12局灶[-]AMACR局灶[+]。
192	65岁	一、前列腺超声造影检查： 前列腺造影未见明显异常 二、超声引导下前列腺系统穿刺术 （建议静卧床24小时，请临床注意观察术后并发症。）	前列腺增大，提示增生，请结合临床及其他检查。												“左前列腺穿刺”前列腺组织，小灶腺体细胞核仁明显，基底细胞缺失，符合微小腺癌，镜下最大径<1mm。“右前列腺穿刺”，前列腺组织，局灶腺体细胞核仁明显，小灶基底细胞缺失，符合高级别PIN伴微小腺癌（镜下最大径<1mm）。免疫组化结果：P63局灶[-]34βE12局灶[-]AMACR局灶[+]。
193	63岁	一、前列腺超声造影检查： 前列腺造影未见明显异常 二、超声引导下前列腺系统穿刺术 （建议静卧床24小时，请临床注意观察术后并发症。）	未做												“左、右前列腺穿刺”前列腺增生性病变。免疫组化结果：免疫组化：P63[+]34βE12[+]AMACR[-]。
194	61岁	前列腺超声造影检查： 前列腺未见明显异常增强区	未做												无
195	66岁	一、前列腺超声造影检查： 前列腺造影未见明显异常 二、超声引导下前列腺系统穿刺术 （建议静卧床24小时，请临床注意观察术后并发症。）	未做												“左侧前列腺穿刺标本”前列腺腺癌，Gleason分级3+4=7分，肿瘤占比约30%。“右侧前列腺穿刺标本”前列腺腺癌，Gleason分级3+4=7分，肿瘤占比约30%。免疫组化结果：免疫组化：AMACR[+]P63[-]34βE12[-]。
196	56岁	前列腺超声造影检查： 前列腺未见明显异常增强区	前列腺增生。前列腺外周带两侧异常信号灶，盆腔数枚淋巴结显示，请结合临床及其他检查。												“右前列腺穿刺”前列腺腺癌，Gleason分级3+3=6分，肿瘤占比约5%。“左前列腺穿刺”，前列腺增生伴局灶腺体增生活跃。免疫组化结果：左侧前列腺增生活跃腺体：P63[+]34βE12[+]AMACR[+]。免疫组化切片内右侧前列腺肿瘤区域缺如。
197	65岁	前列腺超声造影检查： 前列腺双侧外腺区局部呈“快进快出”高增强	前列腺增生，前列腺外周带异常强化小结节影，肿瘤待排，建议进一步检查。射精管囊肿考虑。												1.“左侧前列腺穿刺标本”前列腺腺癌，Gleason分级3+4=7，肿瘤占比约50%。1.“右侧前列腺穿刺标本”前列腺腺癌，Gleason分级4+3=7分。肿瘤占比约60%，免疫组化结果：免疫组化：肿瘤组织AMACR[+]P63[-]34βE12[-]。
198	88岁	前列腺超声造影检查： 前列腺未见明显异常增强区	前列腺增生；T2WI前列腺右侧外周带低信号，请结合临床，建议穿刺检查。												“左前列腺穿刺”前列腺组织，灶性腺体增生。“右前列腺穿刺”，前列腺组织，局灶腺体增生，间质内淋巴细胞聚集、增生。免疫组化结果：P63[+]34βE12[+]AMACR[-]。
199	85岁	前列腺超声造影检查： 前列腺未见明显异常增强区	上述征象，前列腺增生表现可符，其中右前部局部DWI高信号区，癌待排。请结合临床及穿刺结果。双侧腹股沟区多发小淋巴结。												“左前列腺穿刺”前列腺增生性病变，局灶间质淋巴细胞、浆细胞聚集、增生。“右前列腺穿刺”前列腺增生性病变，局灶间质淋巴细胞、浆细胞聚集、增生，个别腺腔积脓。免疫组化结果：P63[+]34βE12[+]AMACR[-]。
200	76岁	一、前列腺超声造影检查： 前列腺左侧外腺局部呈“快进快出”高增强，CA待排 二、超声引导下前列腺系统穿刺术 （建议静卧床24小时，请临床注意观察术后并发症。）	前列腺中央腺及左侧外周带异常信号影，考虑前列腺癌，并侵犯两侧精囊腺，请结合临床及其他检查。前列腺增生，前列腺外周带异常信号灶，右侧为著，出血考虑，穿刺后改变可能。												“左前列腺穿刺”前列腺腺癌，Gleason分级4+3=7分，穿刺组织6条，肿瘤占比约90%，累及神经束。“右前列腺穿刺”，前列腺慢性炎伴局灶腺体增生。免疫组化结果：左侧：P63[-]34βE12[-]AMACR[+]S100神经束[+]，右侧：P63[+]34βE12[+]AMACR[-]。
201	62岁	一、前列腺超声造影检查： 前列腺左侧外腺区结节呈“同进同出”等增强，部分未见增强 二、超声引导下前列腺系统穿刺术 （建议静卧床24小时，请临床注意观察术后并发症。）	未做												“左前列腺穿刺”前列腺组织慢性炎伴部分腺体增生及少许中性粒细胞浸润，个别腺腔积脓。“右前列腺穿刺”，前列腺组织慢性炎伴增生，间质多灶淋巴、浆细胞聚集增生、淋巴滤泡形成伴中性粒细胞浸润，部分腺腔积脓、泡沫细胞聚集。免疫组化结果：P63[+]34βE12[+]AMACR[-]。
202	64岁	一、前列腺增生伴结石，超声造影提示：前列腺未见明显异常增强区 二、超声引导下前列腺系统穿刺术 （建议静卧床24小时，请临床注意观察术后并发症。）	前列腺结节增生，请结合临床。												“左前列腺穿刺”前列腺腺癌。“右前列腺穿刺”，前列腺组织伴部分腺体增生活跃，部分组织呈慢性炎伴腺腔积脓肿。免疫组化结果：左侧：P63[-]34βE12[-]AMACR[+]，右侧：P63[+]34βE12[+]AMACR[-]。
203	79岁	前列腺超声造影检查： 前列腺未见明显异常增强区	前列腺增生，左后外周带强化小结节影；请结合临床及其他相关检查。												“左前列腺穿刺”前列腺腺癌，Gleason分级3+3=6分，肿瘤占比约10%。“右前列腺穿刺”前列腺腺癌，Gleason分级3+3=6分，肿瘤占比5-10%。
204	62岁	前列腺超声造影检查：前列腺造影未见明显异常	前列腺增生。左侧射精管囊肿可能，请结合临床。												“右前列腺穿刺”前列腺慢性炎，局灶见小团腺体，腺上皮细胞增大，可见小核仁，免疫组化提示基底细胞明显减少，考虑不典型小腺体。“左前列腺穿刺”，前列腺慢性炎伴上皮增生。免疫组化结果：右侧：P63小灶[-]34βE12小灶[-]AMACR小灶[+]，左侧：P63[+]34βE12[+]AMACR[-]。
205	68岁	一、前列腺超声造影检查： 前列腺右侧外腺局部呈“快进快出”高增强 检查医师：王炜 二、超声引导下前列腺穿刺术 （建议静卧床24小时，请临床注意观察术后并发症。）	前列腺增生改变；右侧外周带前缘囊性变；另右侧外周带异常强化灶，炎性病变可能，请结合临床、PSA及超声检查，并复查。												“左、右前列腺穿刺”前列腺慢性炎伴增生，间质少许中性粒细胞浸润，部分腺腔内积脓。免疫组化结果：免疫组化：P63[+]34βE12[+]AMACR[-]。
206	79岁	前列腺增生伴结石，超声造影提示：前列腺未见明显异常增强区 超声引导下前列腺系统穿刺术 （建议静卧床24小时，请临床注意观察术后并发症。）	未做												“左前列腺穿刺”前列腺慢性炎，局灶见少许异型小腺体增生，最大径≤1mm，结合免疫组化结果，符合微小癌或癌旁组织。“右前列腺穿刺”，前列腺慢性炎伴增生，间质灶性淋巴细胞聚集、增生。免疫组化结果：左侧异型小腺体：P63[-]34βE12[-]AMACR[+]。
207	78岁	前列腺增生伴结石，超声造影提示：前列腺未见明显异常增强区	未做												“左、右前列腺穿刺”前列腺增生性病变，慢性前列腺炎。免疫组化结果：免疫组化：P63[+]34βE12[+]AMACR[-]。
208	78岁	超声引导下前列腺系统穿刺术 （建议静卧床24小时，请临床注意观察术后并发症。）	未做												同上
209	77岁	一、前列腺超声造影检查： 前列腺外腺局部呈“快进快出”高增强 二、超声引导下前列腺系统穿刺术 （建议静卧床24小时，请临床注意观察术后并发症。）	前列腺增生。前列腺左外侧叶结节，考虑占位可能，请结合临床及其他相关检查。右侧精索内侧占位，请结合其他相关检查。												“左、右前列腺穿刺”前列腺增生性病变。免疫组化结果：免疫组化：P63[+]34βE12[+]AMACR[-]。
210	65岁	一、前列腺超声造影检查： 前列腺呈整体不均匀高增强，偏左侧局部无强化，提示：弥漫性CA伴局部坏死可能 二、超声引导下前列腺系统穿刺术 （建议静卧床24小时，请临床注意观察术后并发症。）	前列腺Ca伴周围浸润，膀胱及两侧精囊腺受累，请结合临床。双侧髋臼、耻骨、坐骨多发异常信号，双髋关节间隙模糊，盆底左侧部分肌肉信号异常，考虑转移可能大，请结合临床。直肠下段管壁稍增厚伴粘膜面强化结节，请结合临床。盆腔少量积液。双侧腹股沟区多发小淋巴结影。												“左、右前列腺穿刺”前列腺腺癌，Gleason分级4+4=8分。免疫组化结果：AMACR[+]P63[-]34βE12[-]。
211	65岁	一、前列腺超声造影检查： 前列腺偏左侧外腺不均质呈“快进同出”低增强 二、超声引导下前列腺系统穿刺术 （建议静卧床24小时，请临床注意观察术后并发症。）	前列腺左后方外周带结节样异常强化灶，肿瘤性病变可能，建议进一步检查；前列腺增生伴钙化，前列腺中叶叶条形短T1信号影，考虑出血可能，请结合临床。												“右前列腺穿刺”前列腺腺癌，Gleason分级3+3=6分。“左前列腺穿刺”，前列腺增生性病变。免疫组化结果：右侧：P63[-]34βE12[-]AMACR[+]，左侧：P63[+]34βE12[+]AMACR[-]。
212	59岁	一、前列腺超声造影检查： 前列腺造影未见明显异常 二、超声引导下前列腺系统穿刺术 （建议静卧床24小时，请临床注意观察术后并发症。）	前列腺增生表现，请结合临床及其他检查。射精管囊肿考虑。												“左、右前列腺穿刺”前列腺增生性病变，慢性前列腺炎。免疫组化结果：免疫组化：P63[+]34βE12[+]AMACR[-]。
213	60岁	一、前列腺超声造影检查： 前列腺造影未见明显异常 二、超声引导下前列腺系统穿刺术 （建议静卧床24小时，请临床注意观察术后并发症。）	前列腺增生；前列腺外周带局部异常信号，请结合临床及穿刺活检。												“左、右前列腺穿刺”前列腺增生性病变。免疫组化结果：免疫组化：P63[+]34βE12[+]AMACR[-]。
214	55岁	一、前列腺超声造影检查： 前列腺造影未见明显异常 二、超声引导下前列腺系统穿刺术 （建议静卧床24小时，请临床注意观察术后并发症。）	前列腺增生，左侧外周带下缘小片异常信号，考虑出血可能，请结合临床，必要时复查。												“左、右前列腺穿刺”前列腺增生性病变。免疫组化结果：免疫组化：P63[+]34βE12[+]AMACR[-]。
215	55岁	一、前列腺超声造影检查： 前列腺造影前列腺呈整体不均匀强化 二、超声引导下前列腺系统穿刺术 （建议静卧床24小时，请临床注意观察术后并发症。）	前列腺异常信号灶，前列腺癌侵及精囊腺、膀胱后壁，伴盆腔淋巴结转移考虑，请结合临床及其他检查。												“左、右前列腺穿刺”前列腺腺癌，Gleason分级5+4=9分。免疫组化结果：AMACR[+]P63[-]34βE12[-]。
216	80岁	一、前列腺超声造影检查： 前列腺右侧外腺区低回声区呈“慢进同出”低增强 二、超声引导下前列腺系统穿刺术 （建议静卧床24小时，请临床注意观察术后并发症。）	前列腺穿刺术后，前列腺中央腺异常信号灶，考虑出血灶可能；左侧外周带内异常信号灶，肿瘤性病变首先考虑，请结合临床。前列腺增生。												1.“左侧前列腺穿刺标本”前列腺腺癌，Gleason分级5+4=9分，（穿刺组织5条，肿瘤占比约95%），可见神经束累犯。1.“右侧前列腺穿刺标本”前列腺腺癌，Gleason分级4+5=9分，（穿刺组织5条，肿瘤占比约90%），免疫组化结果：免疫组化：AMACR[+]P63[-]34βE12[-]PSA[+]S100神经束[+]CDX-2少许弱[+]CK7[-]CK20[-]。
217	76岁	前列腺超声造影检查： 前列腺双侧外腺局部呈“快进快出”高增强	前列腺左后方外周带异常信号灶，肿瘤性病变考虑，建议穿刺活检。两侧精囊腺高密度，出血或粘液蛋白可能；直肠明显扩张，请结合临床。盆腔少量积液。												“左前列腺穿刺”前列腺慢性炎伴增生。“右前列腺穿刺”，前列腺慢性炎伴增生，小灶腺腔内积脓。免疫组化结果：P63[+]34βE12[+]AMACR[-]。
218	65岁	一、前列腺超声造影检查： 前列腺未见明显异常增强区 二、超声引导下前列腺系统穿刺术 （建议静卧床24小时，请临床注意观察术后并发症。）	前列腺增生，前列腺中央带左侧异常强化结节灶，肿瘤待排，请结合临床及其他检查、建议穿刺。												“左前列腺穿刺”前列腺慢性炎伴增生，部分腺体增生活跃。“右前列腺穿刺”，前列腺慢性炎伴增生，小区小腺泡不典型增生。免疫组化结果：左侧：P63[+]34βE12[+]AMACR少许腔面[+]，右侧：P63[+]，个别[-]34βE12[+]，个别[-]AMACR少许腔面[+]。
219	72岁	一、前列腺超声造影检查： 前列腺造影未见明显异常 二、超声引导下前列腺系统穿刺术 （建议静卧床24小时，请临床注意观察术后并发症。）	未做												“左前列腺穿刺”前列腺慢性炎，局灶腺体不典型增生，结合免疫组化结果，符合微小腺癌，Gleason分级3+3=6分，镜下肿瘤最大径1mm。“右前列腺穿刺”，前列腺慢性炎伴增生，间质少许中性粒细胞浸润。免疫组化结果：左侧：P63局灶[-]34βE12局灶[-]AMACR局灶[+]，右侧：P63[+]34βE12[+]AMACR少许腔面[+]。
220	61岁	一、前列腺超声造影检查： 前列腺未见明显异常增强区 二、超声引导下前列腺系统穿刺术 （建议静卧床24小时，请临床注意观察术后并发症。）	前列腺增生，前列腺左侧外周带前下部异常强化灶，考虑增生结节不除外，请结合临床、建议穿刺活检。												“左、右前列腺穿刺”前列腺组织伴灶性腺体增生。免疫组化结果：免疫组化：P63[+]34βE12[+]AMACR[-]。
221	81岁	一、前列腺超声造影检查： 前列腺右侧外腺局部呈“快进快出”高增强 二、超声引导下前列腺系统穿刺术 （建议静卧床24小时，请临床注意观察术后并发症。）	前列腺外周带右侧局部稍短T2信号影，增强扫描类结节样强化，前列腺癌可能；T1WI上前列腺局部斑点状短T1高信号，穿刺术后改变；请结合临床及活检病史。												“右前列腺穿刺”前列腺腺癌，Gleason分级4+3=7分，肿瘤占比约70%。“左前列腺穿刺”前列腺腺癌，Gleason分级3+3=6分，肿瘤占比约15%。免疫组化结果：左侧AMACR[+]P63[-]34βE12[-]。
222	82岁	一、前列腺超声造影检查： 前列腺双侧外腺区结节呈“快进快出”高增强 二、超声引导下前列腺系统穿刺术 （建议静卧床24小时，请临床注意观察术后并发症。）	前列腺增生，外周带小结节影，肿瘤待排，建议进一步检查。盆腔少许积液。两侧盆底软组织区异常信号，伪影考虑，请结合临床。												“右前列腺穿刺”前列腺腺癌，Gleason分级4+3=7分，肿瘤占比约30%。“左前列腺穿刺”，血凝块及少许前列腺组织呈增生性病变。免疫组化结果：右侧：P63[-]34βE12[-]AMACR[+]。
223	61岁	前列腺超声造影检查： 前列腺左侧外腺局部呈“快进快出”高增强	前列腺增生，左侧前列腺外周带异常信号，建议活检。附见:两髋关节少许积液。												“左、右前列腺穿刺”前列腺增生性病变，慢性前列腺炎。免疫组化结果：免疫组化：P63[+]34βE12[+]AMACR[-]。
224	69岁	一、前列腺超声造影检查： 前列腺造影未见明显异常 二、超声引导下前列腺系统穿刺术 （建议静卧床24小时，请临床注意观察术后并发症。）	前列腺增生考虑。												“左前列腺穿刺”前列腺腺癌，Gleason分级4+3=7分，肿瘤占比约50%。“右前列腺穿刺”前列腺腺癌，Gleason分级3+3=6分，肿瘤占比约15%。免疫组化结果：右侧AMACR[+]P63[-]34βE12[-]。
225	79岁	一、前列腺超声造影检查： 前列腺未见明显异常增强区 二、超声引导下前列腺系统穿刺术 （建议静卧床24小时，请临床注意观察术后并发症。）	未做												“右前列腺穿刺”前列腺腺癌，Gleason分级3+3=6分，肿瘤占比约30%。“左前列腺穿刺”，前列腺增生伴区域间质淋巴、浆细胞浸润。免疫组化结果：右侧：P63[-]34βE12[-]AMACR[+]，左侧：P63[+]34βE12[+]AMACR[-]。
226	63岁	一、前列腺超声造影检查： 前列腺未见明显异常增强区 二、超声引导下前列腺系统穿刺术 （建议静卧床24小时，请临床注意观察术后并发症。）	前列腺增生，左外侧叶局部强化稍明显，弥散无明显受限，考虑增生活跃可能，请结合临床。盆腔少许积液。												“左前列腺穿刺”前列腺组织，灶性腺体增生活跃，注意随访。“右前列腺穿刺”，前列腺增生，区域间质少许淋巴、浆细胞浸润，个别腺腔积脓。免疫组化结果：P63[+]34βE12[+]AMACR个别腺体弱[+]。
227	55岁	一、前列腺超声造影检查： 前列腺造影未见明显异常 二、超声引导下前列腺系统穿刺术 （建议静卧床24小时，请临床注意观察术后并发症。）	前列腺增生；外周带后方正中类结节灶，增生或炎性结节可能，建议复查。												“左、右前列腺穿刺”前列腺增生性病变，慢性前列腺炎。免疫组化结果：免疫组化：P63[+]34βE12[+]AMACR[-]。
228	66岁	一、前列腺增生伴结石，超声造影提示：前列腺未见明显异常增强区 二、超声引导下前列腺系统穿刺术 （建议静卧床24小时，请临床注意观察术后并发症。）	前列腺增生考虑，请结合临床及其他相关检查。附见:双侧睾丸鞘膜腔少量积液考虑。												“左、右前列腺穿刺”前列腺增生性病变。免疫组化结果：免疫组化：P63[+]34βE12[+]AMACR[-]。
229	72岁	一、前列腺超声造影检查： 前列腺造影未见明显异常 二、超声引导下前列腺系统穿刺术 （建议静卧床24小时，请临床注意观察术后并发症。）	前列腺增生，DWI序列中央腺右前部小片高信号，请结合临床及其他检查结果；射精管囊肿可能；盆腔右侧小淋巴结影，请结合临床。												“左、右前列腺穿刺”前列腺组织，少数腺体不规则，核仁清楚，免疫组化提示基底细胞不完整，考虑不典型小腺泡增生伴局灶萎缩性改变，散在灶性炎细胞浸润。免疫组化结果：免疫组化：P63大部分[+]34βE12大部分[+]AMACR少许弱[+]。
230	33岁	超声造影检查 前列腺外腺呈“同进快退”等增强，提示：前列腺炎症可能	左侧前列腺外周带信号欠均，请结合临床。左侧精囊腺炎症可能，占位性病变不排除，请结合临床。建议复查。												无
231	83岁	一、前列腺超声造影检查： 前列腺左侧外腺不均质回声区呈“快进快出”高增强 二、超声引导下前列腺系统穿刺术 （建议静卧床24小时，请临床注意观察术后并发症。）	前列腺增生，左侧前列腺外周带结节影，考虑Ca可能，伴周围及左侧盆壁淋巴结肿大，左侧精囊腺可疑受侵，请结合临床；盆腔少量积液。												“左前列腺穿刺”前列腺腺癌，Gleason分级4+4=8分，肿瘤占比80%。“右前列腺穿刺”前列腺腺癌，Gleason分级4+4=8分，肿瘤占比40%。免疫组化结果：AMACR[+]P63[-]34βE12[-]。
232	30岁	前列腺超声造影检查： 前列腺未见明显异常增强区,考虑慢性炎症	右侧外周带未强化结节灶，性质待定，请结合PSA数值，必要时穿刺活检。前列腺多发钙化灶。												无
233	68岁	一、前列腺超声造影检查： 前列腺未见明显异常增强区 二、超声引导下前列腺系统穿刺术 （建议静卧床24小时，请临床注意观察术后并发症。）	前列腺增生表现，中央腺右侧份结节样异常信号灶，建议穿刺活检。												“左、右前列腺穿刺”前列腺增生性病变伴前列腺炎。免疫组化结果：免疫组化：P63[+]34βE12[+]AMACR[-]。
234	64岁	一、前列腺超声造影检查： 前列腺未见明显异常增强区 二、超声引导下前列腺系统穿刺术 （建议静卧床24小时，请临床注意观察术后并发症。）	未做												“左、右前列腺穿刺”前列腺慢性炎伴增生，间质灶性淋巴细胞聚集、增生及少量中性粒细胞浸润，部分腺腔内积脓。免疫组化结果：免疫组化：P63[+]34βE12[+]AMACR[-]。
235	61岁	一、前列腺超声造影检查： 前列腺未见明显异常增强区 二、超声引导下前列腺系统穿刺术 （建议静卧床24小时，请临床注意观察术后并发症。）	前列腺增生考虑；射精管囊肿考虑。												“左、右前列腺穿刺”前列腺慢性炎伴增生。免疫组化结果：免疫组化：P63[+]34βE12[+]AMACR[-]。
236	80岁	一、前列腺超声造影检查： 前列腺未见明显异常增强区 二、超声引导下前列腺系统穿刺术 （建议静卧床24小时，请临床注意观察术后并发症。）	膀胱后下壁膀胱壁增厚，请结合临床。左侧前列腺外周带信号欠均匀，增强后似呈结节状强化，请结合临床，建议复查。前列腺结节增生；盆腔少量积液。												“左前列腺穿刺”前列腺腺癌，Gleason分级3+4=7分，肿瘤占比60%。“右前列腺穿刺”前列腺腺癌，Gleason分级3+3=6分，肿瘤占比约40%。免疫组化结果：AMACR[+]P63[-]34βE12[-]。
237	71岁	一、前列腺超声造影检查： 前列腺未见明显异常增强区 二、超声引导下前列腺系统穿刺术 （建议静卧床24小时，请临床注意观察术后并发症。）	未做												“左、右前列腺穿刺”前列腺慢性炎伴腺体增生，灶性腺体增生活跃，符合高级别上皮内瘤变（HGPIN）。免疫组化结果：免疫组化：P63[+]34βE12[+]AMACR小灶[+]。
238	75岁	一、前列腺超声造影检查： 前列腺左侧外腺区结节呈“快进快出”高增强 二、超声引导下前列腺系统穿刺术 （建议静卧床24小时，请临床注意观察术后并发症。）	未做												1.“左侧前列腺穿刺标本”前列腺腺癌，Gleason分级4+5=9分。（穿刺组织6条，肿瘤占比约45%）。1.“右侧前列腺穿刺标本”前列腺腺癌，Gleason分级3+3=6分。（穿刺组织5条，肿瘤占比＜5%），免疫组化结果：免疫组化：AMACR[+]P63[-]34βE12[-]。
239	60岁	一、前列腺超声造影检查： 前列腺未见明显异常增强区 二、超声引导下前列腺系统穿刺术 （建议静卧床24小时，请临床注意观察术后并发症。）	前列腺增生，右侧外周带可疑异常信号结节灶，请结合临床、建议穿刺活检。												“左、右前列腺穿刺”前列腺慢性炎伴部分腺体增生。免疫组化结果：免疫组化：P63[+]34βE12[+]AMACR[-]。
240	52岁	一、前列腺超声造影检查： 前列腺右侧外腺近尖部处结节呈“快进快出”高增强 二、超声引导下前列腺系统穿刺术 （建议静卧床24小时，请临床注意观察术后并发症。）	未做												“左、右前列腺穿刺”前列腺组织伴部分腺体增生。免疫组化结果：免疫组化：P63[+]34βE12[+]AMACR部分腔面弱[+]。
241	67岁	一、前列腺超声造影检查： 前列腺未见明显异常增强区 二、超声引导下前列腺系统穿刺术 （建议静卧床24小时，请临床注意观察术后并发症。）	前列腺增生考虑，请结合临床相关检查及随访。精囊腺偏右侧小囊样短T1高信号，局部出血信号考虑，请结合临床。												“左、右前列腺穿刺”前列腺组织伴腺体增生。免疫组化结果：免疫组化：P63[+]34βE12[+]AMACR少许[+]。
242	94岁	一、前列腺超声造影检查： 前列腺左侧外腺局部呈“快进快出”高增强 二、超声引导下前列腺系统穿刺术 （建议静卧床24小时，请临床注意观察术后并发症。）	前列腺偏大；左侧外周带可疑异常信号，必要时穿刺活检。												“左、右前列腺穿刺”前列腺腺癌，Gleason分级4+3=7分，穿刺组织分别为5条、6条，肿瘤占比分别为50%、60%。免疫组化结果：AMACR[+]P63[-]34βE12[-]S100神经束[+]。
243	65岁	一、前列腺超声造影检查： 前列腺未见明显异常增强区 二、超声引导下前列腺系统穿刺术 （建议静卧床24小时，请临床注意观察术后并发症。）	前列腺轻度增生表现，请结合临床其他检查。												“左前列腺穿刺”前列腺增生性病变，免疫组化P63[+]34βE12[+]AMACR[-]。“右前列腺穿刺”前列腺组织，小区见腺体增生活跃，核增大，核仁易见，免疫组化结果提示小区：AMACR[+]，P63、34βE12减少或消失，考虑为小区前列腺高级别上皮内瘤变（HGPIN）伴非典型小腺泡增生（ASAP），免疫组化AMACR[+]，P63、34βE12减少或消失。
244	70岁	一、前列腺超声造影检查： 前列腺未见明显异常增强区 二、超声引导下前列腺系统穿刺术 （建议静卧床24小时，请临床注意观察术后并发症。）	前列腺结节样增生，建议复查。左后侧外周带斑片异常信号，出血可能，射精管囊肿伴出血可能，请结合临床。左侧鞘膜囊积液，盆腔少许积液。												“左、右前列腺穿刺”前列腺增生性病变。免疫组化结果：免疫组化：P63[+]34βE12[+]AMACR[-]。
245	62岁	一、前列腺超声造影检查： 前列腺右侧外腺结节呈“快进快出”高增强 二、超声引导下前列腺系统穿刺术 （建议静卧床24小时，请临床注意观察术后并发症。）	前列腺增生，右侧外周带下缘结节样强化灶，请结合临床，必要时进一步穿刺活检。射精管囊肿考虑。双侧腹股沟区多发增大淋巴结，部分肿大。附见：双侧髋关节腔少量积液。												“左前列腺穿刺”前列腺腺癌，Gleason分级3+3=6分。“右前列腺穿刺”前列腺腺癌，Gleason分级3+4=7分。免疫组化结果：AMACR[+]P63[-]34βE12[-]。
246	70岁	一、前列腺超声造影检查： 前列腺未见明显异常增强区 二、超声引导下前列腺系统穿刺术 （建议静卧床24小时，请临床注意观察术后并发症。）	前列腺增生，左外周带低信号结节，肿瘤待排，建议穿刺活检。												“左、右前列腺穿刺”前列腺腺体萎缩伴增生性改变。免疫组化结果：免疫组化：P63[+]34βE12[-]AMACR小区[+]。
247	64岁	一、前列腺超声造影检查： 前列腺未见明显异常增强区 二、超声引导下前列腺系统穿刺术 （建议静卧床24小时，请临床注意观察术后并发症。）	前列腺增生，ADC中央腺左侧叶稍低信号结节，请结合临床，必要时穿刺活检；左侧坐骨蜂窝样异常信号，建议CT观察。												“左前列腺穿刺”前列腺腺体萎缩伴增生，间质内淋巴细胞灶状浸润，局灶腺上皮及腺腔内见中性粒细胞微脓肿形成。“右前列腺穿刺”前列腺腺体萎缩伴增生，间质内淋巴细胞灶状浸润，局灶腺上皮及腺腔内见中性粒细胞脓肿形成，部分区域间质细胞增生。免疫组化：P63[+]34βE12[+]AMACR[-]，间质：Desmin[+]SMA[+]CD34血管[+]CD117[-]。
248	79岁	一、前列腺超声造影检查： 前列腺未见明显异常增强区 二、超声引导下前列腺系统穿刺术 （建议静卧床24小时，请临床注意观察术后并发症。）	前列腺增生；前列腺左侧外周带可疑异常信号，占位待排，建议穿刺活检？附见:右侧腹股沟区囊性灶，请结合临床。												“左前列腺穿刺”前列腺萎缩伴增生，“右前列腺穿刺”前列腺腺体增生性改变。免疫组化双侧P63[+]34βE12[+]AMACR[-]。
249	65岁	一、前列腺超声造影检查： 前列腺未见明显异常增强区 二、超声引导下前列腺系统穿刺术 （建议静卧床24小时，请临床注意观察术后并发症。）	前列腺增生考虑，前列腺内斑点状短T1高信号，出血信号考虑，请结合临床病史；左侧前列腺外周带后下方可疑小结节样强化信号，请结合临床及关注。												“左、右前列腺穿刺”前列腺腺体萎缩伴增生，局灶慢性炎改变。免疫组化结果：免疫组化：P63[+]34βE12[+]AMACR[-]。
250	67岁	一、前列腺超声造影检查： 前列腺未见明显异常增强区 二、超声引导下前列腺系统穿刺术 （建议静卧床24小时，请临床注意观察术后并发症。）	未做												“左、右前列腺穿刺”前列腺增生性病变。免疫组化结果：免疫组化：P63[+]34βE12[+]AMACR[-]。
251	69岁	一、前列腺超声造影检查： 前列腺未见明显异常增强区 二、超声引导下前列腺系统穿刺术 （建议静卧床24小时，请临床注意观察术后并发症。）	未做												“左前列腺穿刺”前列腺腺癌，Gleason分级3+3=6分。“右前列腺穿刺”前列腺腺癌，Gleason分级3+4=7分。免疫组化结果：AMACR[+]P63[-]34βE12[-]。
252	63岁	一、前列腺超声造影检查： 前列腺未见明显异常增强区 二、超声引导下前列腺系统穿刺术 （建议静卧床24小时，请临床注意观察术后并发症。）	前列腺增生改变，左侧外周带后方点状异常强化灶，增生活跃可能，请结合临床。												“左、右前列腺穿刺”前列腺增生性病变。免疫组化结果：免疫组化：P63[+]34βE12[+]AMACR[-]。
253	78岁	前列腺超声造影检查： 前列腺未见明显异常增强区	未做												“左、右前列腺穿刺”前列腺腺癌，Gleason分级3+3=6分。免疫组化结果：AMACR[+]P63[-]34βE12[-]。
254	62岁	一、前列腺超声造影检查： 前列腺右侧外腺区局部呈“快进快出”高增强 二、超声引导下前列腺系统穿刺术 （建议静卧床24小时，请临床注意观察术后并发症。）	前列腺增生，两侧外周带异常信号影，考虑穿刺术后改变。右侧外周带异常强化灶，肿瘤性病变考虑，请结合临床。												“左前列腺穿刺”前列腺腺癌，Gleason分级3+3=6分。“右前列腺穿刺”前列腺腺癌，Gleason分级3+4=7分。免疫组化结果：AMACR[+]P63[-]34βE12[-]。
255	74岁	一、前列腺超声造影检查： 前列腺左侧外腺区低回声结节呈“快进快出”高增强 二、超声引导下前列腺系统穿刺术 （建议静卧床24小时，请临床注意观察术后并发症。）	未做												“左、右前列腺穿刺”前列腺腺癌，Gleason分级4+3=7分。免疫组化结果：AMACR[+]P63[-]34βE12[-]。
256	71岁	一、前列腺超声造影检查： 前列腺未见明显异常增强区 二、超声引导下前列腺系统穿刺术 （建议静卧床24小时，请临床注意观察术后并发症。）	前列腺增生。前列腺多发斑点状异常信号灶，钙化灶待排。												“左前列腺穿刺”前列腺腺癌，Gleason分级3+3=6分。“右前列腺穿刺”，前列腺增生性病变，慢性前列腺炎。免疫组化结果：左侧：P63[-]34βE12[-]AMACR[+]，右侧：P63[+]34βE12[+]AMACR[-]。
257	80岁	一、前列腺超声造影检查： 前列腺未见明显异常增强区 二、超声引导下前列腺系统穿刺术 （建议静卧床24小时，请临床注意观察术后并发症。）	前列腺增生，左侧外周带低T2信号，不除外占位可能，建议活检。前列腺外周带后正方小结节灶，射精管囊肿可能。两侧精囊腺T2WI信号下降，请结合临床。膀胱顶部左侧壁局部可见稍增厚、强化，建议膀胱镜检查。												“右前列腺穿刺”前列腺腺癌，Gleason分级3+4=7分。“左前列腺穿刺”，前列腺增生性病变，慢性前列腺炎。免疫组化结果：右侧：P63[-]34βE12[-]AMACR弱[+]，左侧：P63[+]34βE12[+]AMACR[-]。
258	69岁	一、前列腺超声造影检查： 前列腺右侧外腺结节呈“快进快出”高增强 提示：前列腺CA首先考虑 二、超声引导下前列腺系统穿刺术 （建议静卧床24小时，请临床注意观察术后并发症。）	未做												“左、右前列腺穿刺”前列腺腺癌，Gleason分级4+4=8分。免疫组化结果：AMACR[+]P63[-]34βE12[-]。
259	79岁	一、前列腺超声造影检查： 前列腺未见明显异常增强区 二、超声引导下前列腺系统穿刺术 （建议静卧床24小时，请临床注意观察术后并发症。）	前列腺双侧外周带明显强化及弥散受限，前列腺Ca考虑；前列腺外周带散在高信号，穿刺术后出血考虑，请结合临床及相关检查。射精管囊肿。												“左前列腺穿刺”前列腺腺癌，Gleason分级3+3=6分。“右前列腺穿刺”前列腺腺癌，Gleason分级3+4=7分。免疫组化结果：AMACR[+]P63[-]34βE12[-]。
260	75岁	一、前列腺超声造影检查： 前列腺左侧外腺区结节呈“快进快出”高增强 二、超声引导下前列腺系统穿刺术 （建议静卧床24小时，请临床注意观察术后并发症。）	未做												“左前列腺穿刺”前列腺腺癌，Gleason分级4+3=7分，伴少量Gleason5级（<5%），肿瘤占比约60%。“右前列腺穿刺”，良性前列腺增生性改变，局部见少量淋巴细胞、中性粒细胞浸润。免疫组化结果：左侧：P63[-]34βE12[-]AMACR[+]，右侧：P63[+]34βE12[+]AMACR个别[+]。
261	64岁	一、前列腺超声造影检查： 前列腺未见明显异常增强区 二、超声引导下前列腺系统穿刺术 （建议静卧床24小时，请临床注意观察术后并发症。）	未做												“左前列腺穿刺”前列腺腺癌，Gleason分级3+4=7分，肿瘤占比约40%。“右前列腺穿刺”前列腺腺癌，Gleason分级3+3=6分，肿瘤占比约5%。免疫组化结果：AMACR弱[+]P63[-]34βE12[-]。
262	72岁	一、前列腺超声造影检查： 前列腺未见明显异常增强区 二、超声引导下前列腺系统穿刺术 （建议静卧床24小时，请临床注意观察术后并发症。）	前列腺增生，右侧外周带异常强化灶，建议穿刺活检。												“左前列腺穿刺”良性前列腺增生性改变，伴间质淋巴细胞、浆细胞及中性粒细胞浸润。“右前列腺穿刺”，良性前列腺增生性改变，小灶见淋巴组织增生、中性粒细胞浸润。免疫组化结果：P63[+]34βE12[+]AMACR个别腺体[+]。
263	64岁	一、前列腺超声造影检查： 前列腺未见明显异常增强区 二、超声引导下前列腺系统穿刺术 （建议静卧床24小时，请临床注意观察术后并发症。）	未做												“左前列腺穿刺”前列腺良性增生性改变。“右前列腺穿刺”，前列腺良性增生性改变，局灶见淋巴细胞、浆细胞及较多中性粒细胞浸润。免疫组化结果：P63[+]34βE12[+]AMACR[-]。
264	62岁	一、前列腺超声造影检查： 前列腺未见明显异常增强区 二、超声引导下前列腺系统穿刺术 （建议静卧床24小时，请临床注意观察术后并发症。）	前列腺增生伴钙化或结石。												“右前列腺穿刺”良性前列腺增生性改变，局灶见淋巴细胞、浆细胞浸润。“左前列腺穿刺”良性前列腺增生性改变，局灶见淋巴细胞、浆细胞及中性粒细胞浸润。免疫组化:P63[+]34βE12[+]AMACR[-]
265	63岁	一、前列腺超声造影检查： 前列腺未见明显异常增强区 二、超声引导下前列腺系统穿刺术 （建议静卧床24小时，请临床注意观察术后并发症。）	未做												“左前列腺穿刺”前列腺慢性炎伴增生。“右前列腺穿刺”前列腺慢性炎伴萎缩及增生。免疫组化：P63[+]34βE12[+]AMACR[-]。
266	67岁	超声引导下前列腺系统穿刺术 （建议静卧床24小时，请临床注意观察术后并发症。）	前列腺增大，提示增生；双侧外周带异常信号，考虑穿刺后出血，请结合临床考虑。												“左前列腺穿刺”前列腺慢性炎伴增生。“右前列腺穿刺”前列腺慢性炎伴增生，个别腺体增生活跃。免疫组化：左侧P63[+]34βE12[+]AMACR个别[+]，右侧小灶P63[+]34βE12[+]AMACR[+]。
267	67岁	前列腺超声造影检查： 前列腺未见明显异常增强区	同上												同上
268	55岁	前列腺超声造影检查： 前列腺未见明显异常增强区	前列腺外周带异常信号灶，穿刺后改变考虑，请结合临床。前列腺增生，精阜小囊肿。盆腔少量积液。												“左、右前列腺穿刺”前列腺增生性病变。免疫组化结果：免疫组化：P63[+]34βE12[+]AMACR[-]。
269	63岁	前列腺超声造影检查： 前列腺左侧外腺局部呈“快进快出”高增强	未做												“左前列腺穿刺”前列腺腺癌，Gleason分级3+4=7分，穿刺组织6条，肿瘤占比约70%，疫组化结果：AMACR[+]P63[-]34βE12[-]S100神经束[+]。“右前列腺穿刺”，前列腺慢性炎伴增生，免疫组化结果：P63[+]34βE12[+]AMACR[-]。
270	82岁	一、前列腺超声造影检查： 前列腺未见明显异常增强区 二、超声引导下前列腺系统穿刺术 （建议静卧床24小时，请临床注意观察术后并发症。）	未做												“右前列腺穿刺”前列腺腺癌，Gleason分级3+4=7分，肿瘤占比约20%。“左前列腺穿刺”前列腺组织，局灶见少许异型小腺体增生，形态符合前列腺腺癌，但该灶病变少，无法免疫组化证实。免疫组化结果：右侧AMACR[+]P63[-]34βE12[-]。
271	71岁	一、前列腺超声造影检查： 前列腺未见明显异常增强区 二、超声引导下前列腺系统穿刺术 （建议静卧床24小时，请临床注意观察术后并发症。）	前列腺增生。中央腺体右上结节灶，建议穿刺活检检查。												“左、右前列腺穿刺”前列腺慢性炎伴腺体增生。
272	65岁	前列腺超声造影检查： 前列腺未见明显异常增强区	前列腺轻度增生表现，请结合临床其他检查。												同244
273	66岁	前列腺超声造影检查： 前列腺左侧外腺局部呈“快进快出”高增强	未做												1.“左侧前列腺穿刺标本”前列腺腺癌，Gleason分级3+4=7分，肿瘤占比约70%。1.“右侧前列腺穿刺标本”前列腺组织内见少许异型的小腺泡，形态考虑为前列腺腺癌，Gleason分级3+3=6分，肿瘤占比约5%。免疫组化结果：免疫组化：左侧AMACR[+]P63[-]34βE12[-]，右侧病灶小，免疫组化片内缺如。
274	71岁	一、前列腺超声造影检查： 前列腺左侧外腺局部呈“快进快出”高增强 二、超声引导下前列腺系统穿刺术 （建议静卧床24小时，请临床注意观察术后并发症。）	前列腺肿瘤内分泌治疗复查，前列腺内信号异常，局部与膀胱壁分界欠清，右侧精囊腺DWI信号偏高，受累待排，请结合临床及相关检查。前列腺增生；前列腺右缘旁结节状异常信号，少许出血可能，请结合临床。膀胱壁明显增厚，潴留性改变可能性大，请结合临床。												1.“左侧前列腺穿刺标本”前列腺腺癌，Gleason分级4+5=9分，肿瘤占比约80%，伴有神经束侵犯。1.“右侧前列腺穿刺标本”前列腺腺癌，Gleason分级4+3=7分，肿瘤占比约90%，免疫组化结果：免疫组化：AMACR[+]P63[-]34βE12[-]。
275	70岁	一、前列腺超声造影检查： 前列腺双侧外腺区不均质低回声结节呈“快进快出”高增强 二、超声引导下前列腺系统穿刺术 （建议静卧床24小时，请临床注意观察术后并发症。）	前列腺轻度增生；前列腺外周带左右部可疑异常信号，建议穿刺活检。												1.“左侧前列腺穿刺标本”前列腺腺癌，Gleason分级3+3=6分，伴少量Gleason4级<5%，肿瘤占比约70%。1.“右侧前列腺穿刺标本”前列腺腺癌，Gleason分级3+4=7分，肿瘤占比约707%。免疫组化结果：免疫组化：AMACR[+]P63[-]34βE12[-]。
276	75岁	一、前列腺超声造影检查： 前列腺右侧外腺及内腺区不均质回声结节呈“快进快出”高增强 二、超声引导下前列腺系统穿刺术 （建议静卧床24小时，请临床注意观察术后并发症。）	前列腺右侧外周带及中央腺体内低信号灶，占位首拟，左侧耻骨下支及左髋臼异常强化灶，转移待排，结合临床。												1.“左侧前列腺穿刺标本”前列腺腺癌，Gleason分级4+4=8分，肿瘤占比约50%，伴少许导管内癌成份。1.“右侧前列腺穿刺标本”前列腺腺癌，Gleason分级4+4=8分，肿瘤占比约50%，伴少许导管内癌成份。免疫组化结果：免疫组化：双侧AMACR[+]P63[-]34βE12[-]，导管内癌成份：P63[+]34βE12[+]AMACR[+]。
277	63岁	一、前列腺超声造影检查： 前列腺未见明显异常增强区 二、超声引导下前列腺系统穿刺术 （建议静卧床24小时，请临床注意观察术后并发症。）	前列腺增生；前列腺外周带散在异常信号灶，炎性病变可能，请结合临床。												“左前列腺穿刺”慢性前列腺炎伴前列腺增生，另见少许横纹肌组织及神经节细胞。“右前列腺穿刺”，慢性前列腺炎伴前列腺增生，另见少许横纹肌组织。免疫组化结果：双侧P63[+]34βE12[+]AMACR[-]。
278	66岁	一、前列腺超声造影检查： 前列腺左侧外腺局部呈“快进快出”高增强 二、超声引导下前列腺系统穿刺术 （建议静卧床24小时，请临床注意观察术后并发症。）	前列腺癌可能大，伴盆腔多发淋巴结转移考虑，请结合临床并穿刺活检。两侧精囊腺T2WI信号减低，请结合临床。												1.“左侧前列腺穿刺标本”前列腺腺癌，Gleason分级5+4=9分，肿瘤占比约60-70%。1.“右侧前列腺穿刺标本”前列腺腺癌，Gleason分级5+4=9分，肿瘤占比约80-90%。免疫组化结果：免疫组化：左侧AMACR弱[+]P63[-]34βE12[-]Syn[+]CgA[-]CD56个别[+]；右侧。[+]P63[-]34βE12[-]Syn[+]CgA[-]CD56个别[+]；右侧。[+]P63[-]34βE12[-]Syn[+]CgA[-]CD56个别[+]；右侧[+]P63[-]34βE12[-]Syn[+]CgA[-]CD56个别[+]；右侧。AMACR[+]P63[-]34βE12[-]Syn灶[+]CgA[-]CD56[-]。
279	67岁	前列腺超声造影检查： 前列腺外腺局部呈“快进快出”高增强	前列腺区与膀胱内占位病变，考虑前列腺Ca可能大，不除外膀胱病变可能，请结合临床及相关检查；前列腺增生改变。附见:右侧腹股沟疝可能大，请结合临床。												“左、右前列腺穿刺”前列腺增生性病变，局灶腺上皮乳头状增生，核增大，可见核仁，免疫组化提示基底细胞减少，符合高级别PIN改变。免疫组化结果：免疫组化：P63[+]减少34βE12[+]减少AMACR局灶[+]。
280	57岁	一、前列腺增生伴结石，超声造影提示：前列腺未见明显异常增强区 二、超声引导下前列腺系统穿刺术 （建议静卧床24小时，请临床注意观察术后并发症。）	前列腺增生伴多发增生结节，DWI扫描左侧中央腺高信号，肿瘤性病变可能，请结合临床，建议穿刺活检。膀胱多发结石。												“左、右前列腺穿刺”前列腺增生性病变，慢性前列腺炎。
281	84岁	前列腺超声造影检查： 前列腺未见明显异常增强区	前列腺增生表现，其中ADC图左侧外周带近精囊腺区信号减低区，性质待定，请结合临床相关检查。右侧盆腔小淋巴结显示。												“左、右前列腺穿刺”前列腺增生性病变。免疫组化结果：免疫组化：P63[+]34βE12[+]AMACR[-]。
282	90岁	前列腺超声造影检查： 前列腺未见明显异常增强区	前列腺增生改变，请结合临床及相关检查。												无
283	73岁	前列腺超声造影检查： 前列腺未见明显异常增强区	未做												“右前列腺穿刺”前列腺腺癌，Gleason分级4+3=7分。“左前列腺穿刺”，前列腺增生性病变。免疫组化结果：右侧：P63[-]34βE12[-]AMACR[+]，左侧：P63[+]34βE12[+]AMACR[-]。
284	66岁	前列腺超声造影检查： 前列腺外腺局部呈“快进快出”高增强	前列腺增生；前列腺左侧中央叶占位性病变可能大，请穿刺进一步检查。												“右前列腺穿刺”前列腺腺癌，Gleason分级3+3=6分。“左前列腺穿刺”，前列腺增生性病变。免疫组化结果：右侧：P63[-]34βE12[-]AMACR[+]，左侧：P63[+]34βE12[+]AMACR[-]。
285	80岁	前列腺超声造影检查： 前列腺左侧内腺结节呈“快进快出”高增强，建议穿刺活检	前列腺增生，中央腺右侧份异常信号肿块（两枚），癌待排，请结合临床相关检查。附见：左侧股骨头异常信号，滑膜囊疝可能。												“左、右前列腺穿刺”前列腺增生性病变。免疫组化结果：免疫组化：P63[+]34βE12[+]AMACR[-]。
286	66岁	前列腺增生伴结石，超声造影提示：前列腺未见明显异常增强区	前列腺肥大，左侧前列腺局部积液可能，出血灶不排除，请结合临床。												“左、右前列腺穿刺”前列腺增生性病变。免疫组化结果：免疫组化：P63[+]34βE12[+]AMACR[-]。
287	70岁	前列腺超声造影检查： 前列腺未见明显异常增强区	未做												“左、右前列腺穿刺”前列腺增生性病变。免疫组化结果：免疫组化：P63[+]34βE12[+]AMACR[-]。
288	69岁	一、前列腺超声造影检查： 前列腺增生伴结石，超声造影提示：前列腺未见明显异常增强区 二、超声引导下前列腺系统穿刺术 （建议静卧床24小时，请临床注意观察术后并发症。）	前列腺增生伴钙化。膀胱憩室，膀胱及憩室多发结石。												“左、右前列腺穿刺”前列腺增生性病变。免疫组化结果：免疫组化：P63[+]34βE12[+]AMACR[-]。
289	61岁	一、前列腺超声造影检查： 前列腺未见明显异常增强区 二、超声引导下前列腺系统穿刺术 （建议静卧床24小时，请临床注意观察术后并发症。） 手术者：陈创华	前列腺增生考虑。												“左、右前列腺穿刺”前列腺组织，小灶淋巴细胞浸润及腺体增生。免疫组化结果：免疫组化：P63[+]34βE12[+]AMACR[-]。
290	61岁	一、前列腺超声造影检查： 前列腺未见明显异常增强区 二、超声引导下前列腺系统穿刺术 （建议静卧床24小时，请临床注意观察术后并发症。）	前列腺增大，提示增生表现，请结合临床考虑。												“左前列腺穿刺”前列腺增生性病变，可见小灶不典型小腺泡，镜下最大径约0.5mm，结合免疫组化结果，考虑为微小腺泡癌。“右前列腺穿刺”，前列腺增生性病变。免疫组化结果：左侧小灶：P63[-]34βE12[-]AMACR[+]，右侧：P63[+]34βE12[+]AMACR少许弱[+]。
291	64岁	一、前列腺超声造影检查： 前列腺左侧外腺区结节呈“快进快出”高增强 二、超声引导下前列腺系统穿刺术 （建议静卧床24小时，请临床注意观察术后并发症。）	上述征象，前列腺增生表现，双侧外周带T1序列稍高信号，出血考虑；另左侧外周带异常信号，癌待排，请结合临床相关检查。												“左前列腺穿刺”前列腺腺癌，Gleason分级3+4=7分，穿刺组织5条，肿瘤占比55-60%。“右前列腺穿刺”，前列腺组织，小灶上皮增生活跃，结合免疫组化结果，不排除前列腺癌可能（病灶太小）。免疫组化结果：左侧：P63[-]34βE12[-]AMACR[+]，右侧：AMACR小灶[+]P63[-]34βE12[-]。
292	67岁	一、前列腺超声造影检查： 前列腺未见明显异常增强区 二、超声引导下前列腺系统穿刺术 （建议静卧床24小时，请临床注意观察术后并发症。）	未做												“左、右前列腺穿刺”前列腺组织，小灶淋巴细胞浸润及腺体增生，右侧少许不典型小腺泡增生。免疫组化结果：免疫组化：P63[+]34βE12[+]AMACR散在弱[+]，右侧少许腺体：P63[-]34βE12[-]。
293	78岁	一、前列腺超声造影检查： 前列腺未见明显异常增强区 二、超声引导下前列腺系统穿刺术 （建议静卧床24小时，请临床注意观察术后并发症。）	未做												“左前列腺穿刺”前列腺组织内见小灶增生的小腺泡（约15个左右腺体），腺腔内见结晶体，核仁明显，结合免疫组化结果，考虑为前列腺腺癌（病灶小，请注意结合临床）。“右前列腺穿刺”前列腺组织内见散在少许灶性增生的腺体（每灶约5个左右腺体），可见明显核仁，结合免疫组化结果，高度怀疑为前列腺腺癌。免疫组化：左侧小灶：AMACR弱[+]P63[-]34βE12[-]，右侧散在灶性：AMACR[+]P63[-]34βE12[-]。。
294	69岁	一、前列腺超声造影检查： 前列腺未见明显异常增强区 二、超声引导下前列腺系统穿刺术 （建议静卧床24小时，请临床注意观察术后并发症。）	上述征象，前列腺增生考虑，中央偏左侧异常信号，钙化可能，请结合临床相关检查。双侧腹股沟区多发小淋巴结。												“左、右前列腺穿刺”前列腺组织，小灶腺体增生，左侧个别腺体增生活跃。免疫组化结果：免疫组化：P63[+]34βE12[+]AMACR[-]。
295	71岁	一、前列腺超声造影检查： 前列腺右侧外腺结节呈“快进快出”稍高增强 二、超声引导下前列腺系统穿刺术 （建议静卧床24小时，请临床注意观察术后并发症。） 手术者：孔凡雷	前列腺增生伴钙化或少许灶状出血考虑，右侧中央腺及左侧外周带异常信号影，占位不除外，请结合病理检查。												“左前列腺穿刺”前列腺腺癌，Gleason分级4+4=8分。“右前列腺穿刺”前列腺腺癌，Gleason分级4+3=7分。免疫组化结果：AMACR[+]P63[-]34βE12[-]。
296	62岁	一、前列腺超声造影检查： 前列腺未见明显异常增强区 二、超声引导下前列腺系统穿刺术 （建议静卧床24小时，请临床注意观察术后并发症。） 手术者：孔凡雷	前列腺右侧中央带斑片状异常稍低强化伴弥散受限区，肿瘤性病变待排，前列腺中央腺及外周带散在高信号，结合临床考虑穿刺后出血可能，前列腺增生伴钙化，请结合临床及穿刺活检结果。												“左前列腺穿刺”前列腺腺癌，Gleason分级3+3=6分。“右前列腺穿刺”前列腺腺癌，Gleason分级4+3=7分。免疫组化结果：AMACR[+]P63[-]34βE12[-]。
297	64岁	一、前列腺超声造影检查： 前列腺未见明显异常增强区 二、超声引导下前列腺系统穿刺术 （建议静卧床24小时，请临床注意观察术后并发症。） 手术者：孔凡雷	上述征象，前列腺增生表现考虑，右侧外周带及左侧中央腺体区可疑异常信号，请结合临床相关检查。												“左前列腺穿刺”前列腺慢性炎伴化脓性炎。“右前列腺穿刺”前列腺增生性病变。免疫组化：P63[+]34βE12[+]AMACR[-]。
298	72岁	一、前列腺超声造影检查： 前列腺外腺整体呈“快进快出”高增强（右侧明显） 提示弥漫性Ca 二、超声引导下前列腺系统穿刺术 （建议静卧床24小时，请临床注意观察术后并发症。） 手术者：孔凡雷	未做												“左、右前列腺穿刺”前列腺腺癌，Gleason分级4+3=7分。免疫组化结果：AMACR[+]P63[-]34βE12[-]。
299	53岁	一、前列腺增生伴结石，超声造影提示：前列腺未见明显异常增强区 二、超声引导下前列腺系统穿刺术 （建议静卧床24小时，请临床注意观察术后并发症。）	上述征象，前列腺增生表现可符，请结合临床相关检查，必要时穿刺检查。前列腺中央腺体偏左侧及左侧外周带区数个点状短T2信号，小结石考虑，请结合超声检查。右侧精囊腺少许斑点状短T1信号，少许出血待排，请结合临床。												“双侧前列腺穿刺”前列腺增生性病变。
300	71岁	一、前列腺超声造影检查： 前列腺双侧外腺局部呈“快进快出”高增强，前列腺CA待排 二、超声引导下前列腺系统穿刺术 （建议静卧床24小时，请临床注意观察术后并发症。）	1.上述改变，前列腺Ca可符；盆腔左侧小淋巴结显示。2.前列腺增生症。3.双侧髋臼及股骨上段信号不均，强化不均，需随访关注。4.膀胱壁稍增厚，内壁较毛糙，炎症所致考虑。												“左前列腺穿刺”前列腺癌，Gleason分级4+5=9分。“右前列腺穿刺”前列腺癌，Gleason分级3+4=7分。
301	70岁	一、前列腺超声造影检查： 前列腺左侧外腺区结节呈“快进快出”高增强 二、超声引导下前列腺系统穿刺术 （建议静卧床24小时，请临床注意观察术后并发症。）	未做												1.“左侧前列腺穿刺”前列腺癌，Gleason评分3+4=7分，其中<5%腺体为5级。（穿刺组织6条，肿瘤占比约70%） 2.“右侧前列腺穿刺”前列腺腺体增生，灶性腺体增生活跃，有待结合免疫组化结果诊断。2018.6.28补充报告：“右侧前列腺穿刺”前列腺组织，内见3个腺体上皮增生、有异型，免疫组化提示AMACR[+]、P63[-]、34βE12[-]，结合左侧前列腺穿刺结果，考虑前列腺腺癌（Gleason评分3分）。
302	65岁	前列腺超声造影检查： 前列腺未见明显异常增强区	未做												1.“左侧前列腺穿刺标本”前列腺腺癌，Gleason分级3+4=7分。（穿刺组织6条，肿瘤占比约30-35%）。1.“右侧前列腺穿刺标本”前列腺腺癌，Gleason分级3+3=6分。（穿刺组织5条，肿瘤占比约5%），免疫组化结果：免疫组化：AMACR[+]P63[-]34βE12[-]。
303	45岁	前列腺超声造影检查： 前列腺未见明显异常增强区	前列腺MR平扫+增强未见明显异常。												“左、右侧前列腺穿刺”前列腺增生性病变，慢性前列腺炎。免疫组化结果：免疫组化：P63[+]34βE12[+]AMACR[-]。
304	79岁	前列腺超声造影检查： 前列腺未见明显异常增强区	前列腺增生。中央腺体及右侧外周带DWI弥散受限，ADC信号减低，肿瘤性病变待排，请结合临床，建议穿刺检查。												1.“左侧前列腺穿刺标本”前列腺腺癌，Gleason分级3+3=6分。（穿刺组织3条，肿瘤占比约30%）。2.“右侧前列腺穿刺标本”前列腺腺癌，Gleason分级4+5=9分。（穿刺组织6条，肿瘤占比约90%），免疫组化结果：免疫组化：AMACR[+]P63[-]34βE12[-]S-100神经束[+]。
305	86岁	一、前列腺超声造影检查： 前列腺未见明显异常增强区 二、超声引导下前列腺系统穿刺术 （建议静卧床24小时，请临床注意观察术后并发症。）	前列腺增生，前列腺底部左前侧结节占位尚难除外，建议穿刺活检。右侧精囊腺异常信号，出血或蛋白沉积考虑。右侧阴囊区鞘膜少量积液，请结合临床。												“左、右前列腺穿刺”前列腺增生性病变。免疫组化结果：免疫组化：P63[+]34βE12[+]AMACR[-]。
306	58岁	一、前列腺超声造影检查： 前列腺左侧外腺局部呈“快进快出”高增强 二、超声引导下前列腺系统穿刺术 （建议静卧床24小时，请临床注意观察术后并发症。）	前列腺轻度增生考虑，请结合临床及相关检查。												“左、右前列腺穿刺”前列腺增生性病变。免疫组化结果：免疫组化：P63[+]34βE12[+]AMACR[-]。
307	78岁	前列腺超声造影检查： 前列腺左侧外腺局部呈“快进快出”高增强，提示：前列腺CA考虑	前列腺增生可符；前列腺左侧外周带异常信号影，占位首拟，两侧盆腔稍大淋巴结影，结合临床。												“左前列腺穿刺”前列腺癌，Gleason分级5+4=9分侵犯神经束。“右前列腺穿刺”前列腺癌，Gleason分级4+5=9分。
308	70岁	一、前列腺超声造影检查： 前列腺未见明显异常增强区 二、超声引导下前列腺系统穿刺术 （建议静卧床24小时，请临床注意观察术后并发症。）	1.前列腺增生表现伴少许出血灶考虑，其中左侧、右后侧外周带异常信号，性质待定，请结合临床相关检查。2.双侧腹股沟区多发小淋巴结。												“左侧前列腺穿刺”经免疫组化深切片，可见数团小腺体伴异型，基底细胞缺失，符合前列腺腺癌。免疫组化结果：AMACR[+]P63[-]34βE12[-]。
309	69岁	一、前列腺超声造影检查： 前列腺外腺局部呈“快进快出”高增强 二、超声引导下前列腺系统穿刺术 （建议静卧床24小时，请临床注意观察术后并发症。）	前列腺增生，右后部前列腺外周带小结节影，肿瘤考虑，建议进一步检查。												“右前列腺穿刺”前列腺癌，Gleason分级4+4=8分。“左前列腺穿刺”前列腺增生性病变。免疫组化结果：右侧：AMACR[+]P63[-]34βE12[-],左侧AMACR[-]P63[+]34β12[+]。
310	65岁	一、前列腺超声造影检查： 前列腺未见明显异常增强区 二、超声引导下前列腺系统穿刺术 （建议静卧床24小时，请临床注意观察术后并发症。）	前列腺增生考虑，前列腺左侧外周带信号改变，请结合临床及相关检查。双侧精囊腺弥漫性T1高信号，提示出血或蛋白可能，请结合临床。												1.“右前列腺穿刺”前列腺慢性炎症伴增生，见小灶腺体（4个小腺泡）核仁明显伴异型，符合微小前列腺腺癌或癌旁组织。2.“左侧前列腺穿刺”良性增生性病变，免疫组化结果：右侧小灶异常腺体AMACR[+]P63[-]34βE12[-]，左侧AMACR[-]P63[+]34βE12[+]。
311	90岁	前列腺超声造影检查： 前列腺未见明显异常增强区	前列腺增生伴钙化、少许出血考虑；盆腔少许积液。												“左侧前列腺穿刺”前列腺组织，个别腺腔内积脓，灶性腺体增生。“右侧前列腺穿刺”前列腺组织，灶性淋巴细胞浸润及腺体增生。免疫组化结果：AMACR少许[+-]34βE12[+]P63[+]。
312	68岁	前列腺超声造影检查： 前列腺未见明显异常增强区	前列腺增生考虑；右侧外周带DWI信号稍高，请结合临床，必要时穿刺活检。												“左侧、右侧前列腺穿刺”前列腺组织伴腺体增生，小灶少数腺体增生活跃，难以完全排除前列腺高级别上皮瘤旁组织可能。免疫组化结果：AMACR小灶少数腺体[+]34βE12[+]P63[+]。
313	66岁	前列腺超声造影检查： 前列腺左侧外腺局部呈“快进快出”高增强	前列腺增生，左侧前列腺外周带小结节影，建议进一步检查。												“左、右前列腺穿刺”前列腺慢性炎伴萎缩及增生。免疫组化结果：免疫组化：AMACR[-]P63[+]34βE12[+]。
314	83岁	一、前列腺超声造影检查： 前列腺左侧外腺区结节呈“快进快出”高增强 二、超声引导下前列腺系统穿刺术 （建议静卧床24小时，请临床注意观察术后并发症。）	未做												1.“左侧前列腺穿刺标本”前列腺腺癌，Gleason分级3+3=6分。（穿刺组织6条，肿瘤占比约20%），免疫组化：AMACR[+]P63[-]34βE12[-]。“右侧前列腺穿刺标本”前列腺增生性病变，小区腺体增生活跃，结合形态及免疫组化结果，符合前列腺增生伴小区高级别IPN（高级别腺上皮内新生物），免疫组化结果：免疫组化：AMACR小灶[+]P63[+]34βE12[+]。
315	70岁	前列腺增生伴结石，超声造影提示：前列腺未见明显异常增强区	前列腺增生；前列腺外周带两侧异常信号灶，左侧外周带病变肿瘤待排，请结合临床。												1.“左侧前列腺穿刺标本”前列腺腺癌，Gleason分级3+4=7分，肿瘤占比约70%。1.“右侧前列腺穿刺标本”前列腺慢性炎伴增生。免疫组化结果：免疫组化：左侧AMACR[+]P63[-]34βE12[-]，右侧AMACR[-]P63[+]34βE12[+]。
316	62岁	前列腺超声造影检查： 前列腺左侧外腺结节呈“快进快出”高增强， 提示：前列腺CA待排	未做												“双侧前列腺穿刺”形态符合前列腺良性增生性病变。免疫组化免疫组化结果：P63[+]34βE12[+]AMACR[-]。
317	71岁	一、前列腺超声造影检查： 前列腺双侧外腺局部呈“快进快出”稍高增强 二、超声引导下前列腺系统穿刺术 （建议静卧床24小时，请临床注意观察术后并发症。）	前列腺前叶占位可能，请结果超声造影并建议穿刺活检；前列腺增生改变。												“左前列腺穿刺”前列腺腺癌，Gleason分级3+4=7分。“右前列腺穿刺”前列腺腺癌，Gleason分级3+3=6分。免疫组化结果：AMACR[+]P63[-]34βE12[-]。
318	79岁	一、前列腺超声造影检查： 前列腺未见明显异常增强区 二、超声引导下前列腺系统穿刺术 （建议静卧床24小时，请临床注意观察术后并发症。） 手术者：陈创华	前列腺增生。												“左、右前列腺穿刺”前列腺增生性病变。免疫组化结果：免疫组化：AMACR[-]P63[+]34βE12[+]。
319	79岁	一、前列腺超声造影检查： 前列腺未见明显异常增强区 二、超声引导下前列腺系统穿刺术 （建议静卧床24小时，请临床注意观察术后并发症。）	前列腺增生右侧前列腺外周带小结节影；右侧精囊腺及射精管异常信号，出血待排；建议进一步检查。												“左、右前列腺穿刺”前列腺增生性病变。免疫组化结果：免疫组化：AMACR[-]P63[+]34βE12[+]。
320	70岁	前列腺超声造影检查： 前列腺未见明显异常增强区	前列腺轻度增生，目前未见确切肿块影，请结合临床及其他检查。												“左、右前列腺穿刺”前列腺腺癌，Gleason评分3+4=7分。免疫组化结果：AMACR[+]P63[-]34βE12[-]。
321	77岁	前列腺超声造影检查： 前列腺未见明显异常增强区	前列腺增生伴出血考虑，中央腺体内结节，需予以关注，请结合临床。												“左、右前列腺穿刺”前列腺增生性病变。免疫组化结果：免疫组化：AMACR[-]P63[+]34βE12[+]。
322	70岁	前列腺超声造影检查： 前列腺未见明显异常增强区	前列腺结节增生可能，请结合临床。												“左、右前列腺穿刺”前列腺增生性病变。免疫组化结果：免疫组化：AMACR[-]P63[+]34βE12[+]。
323	83岁	前列腺超声造影检查： 前列腺未见明显异常增强区	前列腺增生考虑，右后叶小结节强化灶，请结合临床及病理检查。												“左前列腺穿刺”前列腺腺癌，Gleason分级3+3=6分。“右前列腺穿刺”前列腺腺癌，Gleason分级3+4=7分。免疫组化结果：AMACR[+]P63[-]34βE12[-]。
324	77岁	一、前列腺超声造影检查： 前列腺右侧外腺大部分呈“快进快出”高增强，前列腺CA首先考虑 二、超声引导下前列腺系统穿刺术 （建议静卧床24小时，请临床注意观察术后并发症。）	未做												“左、右前列腺穿刺”前列腺腺癌，Gleason 评分4+5=9分，累及神经束。免疫组化结果：P63[-]34βE12[-]AMACR[+]。
325	71岁	前列腺增生伴结石，超声造影提示：前列腺未见明显异常增强区 超声引导下前列腺系统穿刺术 （建议静卧床24小时，请临床注意观察术后并发症。）	未做												“左、右前列腺穿刺”慢性前列腺炎伴腺体增生。免疫组化结果：免疫组化：AMACR[-]P63[+]34βE12[+]。
326	71岁	前列腺增生伴结石，超声造影提示：前列腺未见明显异常增强区	前列腺增生。												“前列腺HOLEP标本”前列腺增生性病变。
327	67岁	前列腺超声造影检查： 前列腺左侧外腺局部呈“快进快出”高增强，建议穿刺活检	前列腺增大，提示增生；腺体内多发短T1信号灶，提示出血可能大，请结合病史。												“前列腺HOLEP标本”前列腺增生性病变。
328	65岁	一、前列腺超声造影检查： 前列腺左侧内外腺移行处呈“快进快出”高增强 二、超声引导下前列腺系统穿刺术 （建议静卧床24小时，请临床注意观察术后并发症。）	未做												“左前列腺穿刺”前列腺腺癌，Gleason分级4+3=7分，累及神经束。“右前列腺穿刺”前列腺腺癌，Gleason分级4+3=7分。免疫组化结果：P63[-]34βE12[-]AMACR[+] S100神经束[+]。
329	65岁	前列腺超声造影检查： 前列腺双侧外腺局部呈“快进快出”稍高增强	前列腺增生。前列腺左侧外周带异常信号灶，请结合临床。												“左前列腺穿刺”前列腺腺癌，Gleason分级3+4=7分，累及神经束。“右前列腺穿刺”前列腺腺癌，Gleason分级3+4=7分。免疫组化结果：P63[-]34βE12[-]AMACR[+] S100神经束[+]。
330	67岁	前列腺超声造影检查： 前列腺左侧外腺局部呈“慢进快出”高增强	未做												1.“左侧前列腺穿刺标本”前列腺腺癌，Gleason分级3+4=7分。（穿刺组织5条，肿瘤占比约5%）。1.“右侧前列腺穿刺标本”前列腺增生性病变。免疫组化结果：免疫组化：右侧P63[+]34βE12[+]AMACR[-]，左侧P63[-]34βE12[-]AMACR[+]。
331	72岁	一、前列腺超声造影检查： 前列腺未见明显异常增强区 二、超声引导下前列腺系统穿刺术 （建议静卧床24小时，请临床注意观察术后并发症。） 手术者：孔凡雷	1.前列腺增生，左侧外周带可疑强化灶，建议穿刺活检。2.膀胱内异常团块影，考虑肿瘤性病变伴出血可能，请结合临床。3.膀胱充盈不佳，膀胱癌增厚。												“左前列腺穿刺”前列腺腺癌，Gleason分级3+3=6分。“右前列腺穿刺”前列腺增生性病变。免疫组化结果：左侧AMACR[+]P63[-]34βE12[-]，右侧AMACR[-]P63[+]34βE12[+]。
332	54岁	一、前列腺超声造影检查： 前列腺增生伴结石，超声造影提示：前列腺未见明显异常增强区 二、超声引导下前列腺系统穿刺术 （建议静卧床24小时，请临床注意观察术后并发症。）	前列腺增生，请结合临床。两侧外周带异常信号灶，请结合临床。												“左、右前列腺穿刺”前列腺增生性病变。免疫组化结果：免疫组化：AMACR[-]P63[+]34βE12[+]。
333	67岁	一、前列腺超声造影检查： 前列腺右侧外腺局部呈“快进快出”高增强，CA考虑 二、超声引导下前列腺系统穿刺术 （建议静卧床24小时，请临床注意观察术后并发症。）	1.外周带右侧类小结节影，ADC信号较低，请结合临床其他检查及穿刺活检。2.前列腺增生。												1.“右侧前列腺穿刺标本”前列腺腺癌，Gleason分级4+3=7分，神经束未累及。2.“左侧前列腺穿刺标本”前列腺慢性炎伴增生，免疫组化结果：免疫组化：右侧AMACR[+]P63[-]34βE12[-]S100[+],左侧AMACR[-]P63[+]34βE12[+]。
334	72岁	一、前列腺超声造影检查： 前列腺外腺局部呈“快进快出”高增强 二、超声引导下前列腺系统穿刺术 （建议静卧床24小时，请临床注意观察术后并发症。）	前列腺增生，请结合临床；右侧精囊腺T2信号减低，炎性病变可能，请结合临床。												“左、右前列腺穿刺”前列腺慢性炎症伴增生。免疫组化结果：免疫组化：AMACR[+]P63[+]34βE12[+]。
335	64岁	一、前列腺超声造影检查： 前列腺左侧外腺局部呈“快进快出”高增强 二、超声引导下前列腺系统穿刺术 （建议静卧床24小时，请临床注意观察术后并发症。）	未做												“左前列腺穿刺”前列腺慢性炎伴增生，灶性见中性粒细胞浸润，免疫组化支持上述诊断。“右前列腺穿刺”前列腺慢性炎伴增生，免疫组化支持上述诊断。免疫组化结果：P63[+]34βE12[+]AMACR[-]。
336	55岁	一、前列腺超声造影检查： 前列腺未见明显异常增强区 二、超声引导下前列腺系统穿刺术 （建议静卧床24小时，请临床注意观察术后并发症。）	前列腺增生。												“左、右前列腺穿刺”前列腺萎缩伴增生。免疫组化结果：免疫组化：AMACR[-]P63[+]34βE12[+]。
337	71岁	一、前列腺超声造影检查： 前列腺双侧外腺局部呈“快进快出”稍高增强 二、超声引导下前列腺系统穿刺术 （建议静卧床24小时，请临床注意观察术后并发症。） 检查时间20180523	上述征象，考虑前列腺轻度增生，请结合临床。												“左前列腺穿刺”前列腺腺癌，Gleason分级3+4=7分。“右前列腺穿刺”前列腺腺癌，Gleason分级3+3=6分。免疫组化结果：AMACR[+]P63[-]34βE12[-]。
338	70岁	一、前列腺增生伴结石，超声造影提示：前列腺未见明显异常增强区 二、超声引导下前列腺系统穿刺术 （建议静卧床24小时，请临床注意观察术后并发症。）	未做												“左、右前列腺穿刺”前列腺增生性病变。免疫组化结果：免疫组化：P63[+]34βE12[+]AMACR[-]。
339	81岁	前列腺超声造影检查： 前列腺右侧外腺结节，呈“同进快出”不均匀低增强，建议穿刺活检	前列腺明显增大，提示前列腺增生，其中右侧结节需予以关注；前列腺内多发斑片状异常信号灶，需结合穿刺病史考虑。												“左、右前列腺穿刺”前列腺增生性病变。免疫组化结果：免疫组化：P63[+]34βE12[+]AMACR[-]。
340	69岁	前列腺超声造影检查： 前列腺左侧外腺局部呈“快进快出”高增强	未做												“左前列腺穿刺”前列腺腺癌，Gleason分级4+4=8分，（穿刺组织共8条，肿瘤占比约40%-50%，小区Gleason分级为3）。“右前列腺穿刺”前列腺慢性炎伴增生，小区增生活跃，待补充免疫组化。免疫组化结果：左侧AMACR[+]P63[-]34βE12[-]。 补充报告：1.“左侧前列腺穿刺”前列腺腺癌，累及神经束。2.“右侧前列腺穿刺”小区高级别前列腺上皮内瘤（HPIN），免疫组化结果，左侧S-100神经束[+]，右侧局灶：AMACR[+]P63[+]34βE12[+]。
341	80岁	一、前列腺超声造影检查： 前列腺外腺区呈“快进快出”高增强，提示肿瘤 二、超声引导下前列腺系统穿刺术 （建议静卧床24小时，请临床注意观察术后并发症。） 手术者：孔凡雷	上述征象，考虑前列腺癌可符，侵犯精囊腺可能；请结合临床及肿瘤指标。前列腺增生考虑。												1.“左侧前列腺穿刺标本”前列腺腺癌，Gleason分级5+4=9分。（穿刺组织5条，肿瘤占比约100%）。1.“右侧前列腺穿刺标本”前列腺腺癌，Gleason分级4+5=9分。（穿刺组织5条，肿瘤占比约90%），免疫组化结果：免疫组化：AMACR[+]P63[-]34βE12[-]，待补充S-100。补充报告：“右侧前列腺穿刺”前列腺腺癌累及神经束。免疫组化结果：S-100[+]。
342	71岁	一、前列腺增生伴结石，超声造影提示：前列腺未见明显异常增强区 二、超声引导下前列腺系统穿刺术 （建议静卧床24小时，请临床注意观察术后并发症。）	未做												1.“左侧前列腺穿刺标本”前列腺腺癌，Gleason分级3+3=6分。（穿刺组织5条，肿瘤占比约15%）。1.“右侧前列腺穿刺标本”前列腺腺癌，Gleason分级3+3=6分。（穿刺组织6条，肿瘤占比约10%），免疫组化结果：免疫组化：AMACR[+]P63[-]34βE12[-]。2018.5.30，“右侧前列腺穿刺”前列腺腺癌，累及神经束。
343	61岁	一、前列腺增生伴结石，超声造影提示：前列腺未见明显异常增强区 二、超声引导下前列腺系统穿刺术 （建议静卧床24小时，请临床注意观察术后并发症。） 手术者：陈创华	前列腺增生表现，左侧顶部凸向膀胱富血供小结节灶，考虑膀胱来源可能，肿瘤性病变考虑，请结合临床进一步检查。												1.“右侧前列腺穿刺”前列腺慢性炎伴增生，局灶见不典型小腺泡。1.“右侧前列腺穿刺标本”前列腺慢性炎伴增生。免疫组化结果：免疫组化：右侧不典型小腺泡AMACR小灶[+]34βE12个别[+]P63个别[+]。双侧AMACR灶[+]P63[+]34βE12[+]。
344	73岁	一、前列腺超声造影检查： 前列腺左侧外腺局部呈“快进快出”高增强， 提示：前列腺CA待排 二、超声引导下前列腺系统穿刺术 （建议静卧床24小时，请临床注意观察术后并发症。） 手术者：陈创华	前列腺增生伴钙化。前列腺左侧外周带可疑结节影，请结合其他检查结果。												1.“左侧前列腺穿刺标本”前列腺腺癌，Gleason分级4+4=8分。（穿刺组织5条，肿瘤占比约80%），累及神经束。1.“右侧前列腺穿刺标本”前列腺慢性炎伴增生，免疫组化结果：免疫组化：左侧AMACR[+]P63[-]34βE12[-]，右侧AMACR[-]P63[+]34βE12[+]。
345	51岁	一、前列腺超声造影检查： 前列腺未见明显异常增强区 二、超声引导下前列腺系统穿刺术 （建议静卧床24小时，请临床注意观察术后并发症。） 手术者：陈创华	前列腺轻度增生表现，请结合其他检查。												“左、右前列腺穿刺”前列腺增生性病变。免疫组化结果：免疫组化：AMACR[-]P63[+]34βE12[+]。
346	69岁	一、前列腺超声造影检查： 前列腺右侧外腺结节呈“快进快出”高增强 提示：前列腺CA首先考虑 二、超声引导下前列腺系统穿刺术 （建议静卧床24小时，请临床注意观察术后并发症。） 手术者：陈创华	前列腺增生伴钙化；前列腺外周带右下方异常信号，考虑恶性病变可能，请结合临床；射精管囊肿。												“左侧前列腺穿刺”前列腺增生性病变。“右侧前列腺穿刺”前列腺慢性炎伴大量组织细胞反应、泡沫细胞聚集，淋巴细胞、浆细胞浸润。免疫组化结果：免疫组化：AMACR[-]P63[+]34βE12[+]。“前列腺HOLEP术标本”前列腺增生性病变，免疫组化P63[+]34βE12[+]AMACR[-]。
347	65岁	一、前列腺超声造影检查： 前列腺未见明显异常增强区 二、超声引导下前列腺系统穿刺术 （建议静卧床24小时，请临床注意观察术后并发症。） 手术者：陈创华	前列腺增生可符，请结合临床。												“左、右前列腺穿刺”前列腺增生性病变伴小区腺腔内积脓。免疫组化结果：免疫组化：AMACR[-]P63[+]34βE12[+]。
348	60岁	一、前列腺超声造影检查： 前列腺未见明显异常增强区 二、超声引导下前列腺系统穿刺术 （建议静卧床24小时，请临床注意观察术后并发症。）	前列腺增生伴钙化，请结合临床及相关检查。												“左、右前列腺穿刺”前列腺增生性病变。免疫组化结果：免疫组化：AMACR[-]P63[+]34βE12[+]。
349	63岁	前列腺超声造影检查： 前列腺未见明显异常增强区	前列腺增生，前列腺左侧外周带低信号影，建议穿刺活检。右侧精囊腺短T1短T2信号影，考虑出血可能。												无
350	73岁	一、前列腺超声造影检查： 前列腺未见明显异常增强区 二、超声引导下前列腺系统穿刺术 （建议静卧床24小时，请临床注意观察术后并发症。） 手术者：孔凡雷	前列腺增生。前列腺后方中线处囊性灶，不除外苗勒式囊肿。												“左、右前列腺穿刺”前列腺增生性病变。免疫组化结果：免疫组化：AMACR[-]P63[+]34βE12[+]。
351	32岁	超声造影检查 前列腺外腺呈“快进同退”稍高增强，提示：前列腺炎症？	前列腺偏大。												无
352	61岁	前列腺增生伴结石，超声造影提示：前列腺未见明显异常增强区	前列腺增生，前列腺穿刺术后少许出血可能，请结合临床。												“左、右前列腺穿刺”前列腺增生性病变伴间质淋巴细胞浸润，个别腺腔内见微脓肿。免疫组化结果：免疫组化：AMACR[-]P63[+]34βE12[+]。“前列腺HOLEP术标本”破碎组织，符合前列腺增生性改变。
353	72岁	前列腺超声造影检查： 前列腺左侧外腺局部呈“快进快出”高增强，建议穿刺活检	前列腺增生，前列腺外周带右后异常信号灶，前列腺癌不除外，建议穿刺活检以明确诊断。												“左、右前列腺穿刺”前列腺增生性病变。免疫组化结果：免疫组化：AMACR[-]P63[+]34βE12[+]。
354	66岁	一、前列腺超声造影检查： 前列腺未见明显异常增强区 二、超声引导下前列腺系统穿刺术 （建议静卧床24小时，请临床注意观察术后并发症。） 手术者：孔凡雷	无												“左侧前列腺穿刺”前列腺萎缩伴增生，“右侧前列腺穿刺”1.前列腺萎缩伴增生，局灶淋巴细胞浸润。双侧前列腺免疫组化：AMACR[-]P63[+]34βE12[+]。
355	56岁	一、前列腺超声造影检查： 前列腺未见明显异常增强区 二、超声引导下前列腺系统穿刺术 （建议静卧床24小时，请临床注意观察术后并发症。）	上述征象，考虑前列腺增生，右侧外周带异常信号，可能与活检有关，请结合临床，必要时复查。												“左、右前列腺穿刺”前列腺慢性炎伴个别腔内积脓，腺体周围间质淋巴细胞及嗜酸性粒细胞浸润。免疫组化结果：免疫组化：AMACR[-]P63[+]34βE12[+]。
356	85岁	一、前列腺超声造影检查： 前列腺未见明显异常增强区 二、超声引导下前列腺系统穿刺术 （建议静卧床24小时，请临床注意观察术后并发症。）	前列腺增生，左侧前列腺外周带强化小结节影，建议进一步检查。												“左、右前列腺穿刺”前列腺慢性炎伴中性粒细胞浸润个别腺腔积脓伴腺上皮增生。免疫组化结果：免疫组化：AMACR[-]P63[+]34βE12[+]。“前列腺HOLEP术标本”破碎组织，符合前列腺增生性病变。
357	67岁	一、前列腺超声造影检查： 前列腺左侧外腺区结节呈“快进快出”高增强 二、超声引导下前列腺系统穿刺术 （建议静卧床24小时，请临床注意观察术后并发症。） 手术者：陈创华	未做												“左前列腺穿刺”前列腺腺癌，Gleason分级4+4=8分，肿瘤占比90%。“右前列腺穿刺”前列腺组织慢性炎伴个别腺体活跃增生；另见数块骨骼肌组织。免疫组化结果：左侧AMACR[+]P63[-]34βE12[-]PSA[+]CDX-2[-]。右侧：P63[+]34βE12[+]AMACR[-]。
358	56岁	一、前列腺超声造影检查： 前列腺未见明显异常增强区 二、超声引导下前列腺系统穿刺术 （建议静卧床24小时，请临床注意观察术后并发症。） 手术者：陈创华	前列腺增生；前列腺左侧外周带及中央带明显强化结节考虑占位性病变累及中央叶可能大，建议穿刺活检；左侧盆腔稍大淋巴结影，请结合临床。												“左前列腺穿刺”前列腺腺癌，Gleason分级3+3=6分。“右前列腺穿刺”前列腺腺癌，Gleason分级3+4=7分。免疫组化结果：AMACR[+]P63[-]34βE12[-]。
359	61岁	一、前列腺超声造影检查： 前列腺未见明显异常增强区 二、超声引导下前列腺系统穿刺术 （建议静卧床24小时，请临床注意观察术后并发症。） 手术者：陈创华	未做												“左、右前列腺穿刺”前列腺腺癌，Gleason分级3+3=6分。免疫组化结果：AMACR[+]P63[-]34βE12[-]。
360	64岁	一、前列腺超声造影检查： 前列腺未见明显异常增强区 二、超声引导下前列腺系统穿刺术 （建议静卧床24小时，请临床注意观察术后并发症。） 手术者：陈创华	未做												“左前列腺穿刺”前列腺腺癌，Gleason分级3+3=6分。“右前列腺穿刺”，前列腺增生性病变。免疫组化结果：左侧：AMACR[+]P63[-]34βE12[-]，右侧：P63[+]34βE12[+]AMACR[-]。
361	70岁	一、前列腺超声造影检查： 前列腺未见明显异常增强区 二、超声引导下前列腺系统穿刺术 （建议静卧床24小时，请临床注意观察术后并发症。） 手术者：陈创华	前列腺增生伴内腺多发结节，请结合临床及相关检查，必要时穿刺活检。												“左、右前列腺穿刺”前列腺增生性病变。免疫组化结果：免疫组化：AMACR[-]P63[+]34βE12[+]。
362	61岁	一、前列腺超声造影检查： 前列腺未见明显异常增强区 二、超声引导下前列腺系统穿刺术 （建议静卧床24小时，请临床注意观察术后并发症。）	前列腺增生；前列腺两侧外周带异常信号灶，结合临床，考虑穿刺出血可能。												“左前列腺穿刺”前列腺腺癌，Gleason分级3+3=6分。“右前列腺穿刺”，前列腺增生性病变，慢性前列腺炎。免疫组化结果：左侧：AMACR[+]P63[-]34βE12[-]，右侧：P63[+]34βE12[+]AMACR[-]。
363	77岁	一、前列腺增生伴结石，超声造影提示：前列腺未见明显异常增强区 二、超声引导下前列腺系统穿刺术 （建议静卧床24小时，请临床注意观察术后并发症。）	前列腺MR未见明显异常，请结合临床，必要时复查。												“左、右前列腺穿刺”前列腺增生性病变。免疫组化结果：免疫组化：AMACR[-]P63[+]34βE12[+]。
364	70岁	一、前列腺增生伴结石，超声造影提示：前列腺未见明显异常增强区 二、超声引导下前列腺系统穿刺术 （建议静卧床24小时，请临床注意观察术后并发症。）	上述征象，考虑前列腺增生，请结合临床。												“左前列腺穿刺”前列腺腺癌，Gleason分级3+3=6分。“右前列腺穿刺”，前列腺增生性病变，个别腺体细胞核仁明显。免疫组化结果：左侧：AMACR[+]P63[-]34βE12[-]，右侧：P63[+]34βE12[+]AMACR[-]。
365	83岁	一、前列腺超声造影检查： 前列腺右侧外腺局部呈“快进快出”高增强 二、超声引导下前列腺系统穿刺术 （建议静卧床24小时，请临床注意观察术后并发症。）	未做												“左、右前列腺穿刺”前列腺腺癌，Gleason分级3+4=7分。免疫组化结果：AMACR[+]P63[-]34βE12[-]。
366	63岁	一、前列腺超声造影检查： 前列腺未见明显异常增强区 二、超声引导下前列腺系统穿刺术 （建议静卧床24小时，请临床注意观察术后并发症。）	前列腺增生改变，右侧中叶腺短T1信号影，出血考虑；右侧中央腺局限性向后突出，请结合穿刺结果。												“右前列腺穿刺”前列腺腺癌，Gleason分级3+3=6分。“左前列腺穿刺”，前列腺增生性病变。免疫组化结果：右侧：AMACR[+]P63[-]34βE12[-]，左侧：P63[+]34βE12[+]AMACR[-]。
367	66岁	一、前列腺超声造影检查： 前列腺未见明显异常增强区 二、超声引导下前列腺系统穿刺术 （建议静卧床24小时，请临床注意观察术后并发症。） 手术者：孔凡雷	前列腺增生伴钙化可符，左侧外周带可疑短T2信号影，穿刺术后改变？请结合临床随访。												“左、右前列腺穿刺”前列腺增生性病变。免疫组化结果：免疫组化：AMACR[-]P63[+]34βE12[+]。
368	71岁	一、前列腺超声造影检查： 前列腺未见明显异常增强区 二、超声引导下前列腺系统穿刺术 （建议静卧床24小时，请临床注意观察术后并发症。） 手术者：孔凡雷	前列腺增生考虑，请结合临床相关检查。												“左、右前列腺穿刺”前列腺增生性病变。免疫组化结果：免疫组化：AMACR[-]P63[+]34βE12[+]。
369	68岁	一、前列腺超声造影检查： 前列腺左侧外腺局部呈“快进快出”高增强 二、超声引导下前列腺系统穿刺术 （建议静卧床24小时，请临床注意观察术后并发症。） 手术者：孔凡雷	前列腺外周带后方异常信号影，占位不除外，建议进一步穿刺活检。												1.“左侧前列腺穿刺标本”前列腺腺癌，Gleason分级3+3=6分。（穿刺组织5条，肿瘤占比约30-35%）。1.“右侧前列腺穿刺标本”前列腺腺癌，Gleason分级3+4=7分。（穿刺组织6条，肿瘤占比约40%），免疫组化结果：免疫组化：AMACR[+]P63[-]34βE12[-]。
370	74岁	一、前列腺超声造影检查： 前列腺左侧外腺区结节呈“快进快出”高增强 二、超声引导下前列腺系统穿刺术 （建议静卧床24小时，请临床注意观察术后并发症。） 手术者：孔凡雷	前列腺中央叶、左侧叶结节灶，肿瘤性病变考虑，请结合临床，建议穿刺活检。前列腺增生伴钙化。												“左侧前列腺穿刺标本”前列腺腺癌，Gleason分级5+4=9分。“右侧前列腺穿刺标本”前列腺腺癌，Gleason分级3+3=6分。免疫组化结果：免疫组化：AMACR[+]P63[-]34βE12[-]。
371	84岁	一、前列腺超声造影检查： 前列腺右侧内腺结节呈“快进快出”高增强 二、超声引导下前列腺系统穿刺术 （建议静卧床24小时，请临床注意观察术后并发症。）	前列腺增生，其内信号欠均，请结合临床病史。												“左、右侧前列腺穿刺标本”前列腺腺癌，Gleason分级3+4=7分。免疫组化结果：免疫组化：AMACR[+]P63[-]34βE12[-]。
372	44岁	前列腺超声造影检查： 前列腺未见明显异常增强区	两侧外周带信号异常，不均匀强化，不除外占位，建议活检。												“左、右前列腺穿刺”前列腺增生性病变，部分间质中性粒细胞、淋巴细胞浸润伴局灶腔内积脓。免疫组化结果：免疫组化：AMACR[-]P63[+]34βE12[+]。
373	64岁	一、前列腺超声造影检查： 前列腺未见明显异常增强区 二、超声引导下前列腺系统穿刺术 （建议静卧床24小时，请临床注意观察术后并发症。）	未做												“左、右前列腺穿刺”前列腺增生性病变。免疫组化结果：免疫组化：AMACR[-]P63[+]34βE12[+]。
374	59岁	一、前列腺超声造影检查： 前列腺未见明显异常增强区 二、超声引导下前列腺系统穿刺术 （建议静卧床24小时，请临床注意观察术后并发症。）	前列腺增生考虑，目前占位征象不甚明确，请结合临床、PSA检查及随访。												1.“左侧前列腺穿刺”前列腺组织慢性炎伴萎缩及增生，内见少许精囊腺组织伴间质淀粉样变性。“右侧前列腺穿刺”前列腺组织慢性炎伴萎缩及增生，免疫组化结果：免疫组化：AMACR[-]P63[+]34βE12[+]PSA其中左侧前列腺穿刺小区[-]特殊染色:左侧前列腺穿刺小区:刚果红染色[+]。
375	54岁	前列腺超声造影检查： 前列腺未见明显异常增强区	前列腺增生，两侧外周带出血，考虑术后改变，不除外合并占位，请结合临床。												“左、右前列腺穿刺”前列腺慢性炎伴增生。免疫组化结果：免疫组化：AMACR[-]P63[+]34βE12[+]。
376	58岁	前列腺超声造影检查： 前列腺未见明显异常增强区	前列腺增生改变，两侧外周带信号改变，结合病史，考虑穿刺后改变可能，肿瘤性病变不除外，请结合临床及穿刺结果。												1.“右侧前列腺穿刺标本”前列腺腺癌，Gleason分级3+3=6分。（穿刺组织6条，肿瘤占比约10%）。1.“左侧前列腺穿刺标本”前列腺慢性炎伴增生，免疫组化结果：免疫组化：右侧：AMACR[+]P63[-]34βE12[-]，左侧：P63[+]34βE12[+]AMACR局灶弱[+]。
377	75岁	一、前列腺超声造影检查： 前列腺未见明显异常增强区 二、超声引导下前列腺系统穿刺术 （建议静卧床24小时，请临床注意观察术后并发症。）	未做												1.“右侧前列腺穿刺标本”前列腺腺癌，Gleason分级3+3=6分。（穿刺组织6条，肿瘤占比约5%）。1.“左侧前列腺穿刺标本”前列腺增生性病变。免疫组化结果：免疫组化：右侧：AMACR[+]P63[-]34βE12[-]，左侧：AMACR[-]P63[+]34βE12[+]。
378	75岁	一、前列腺超声造影检查： 前列腺未见明显异常增强区 二、超声引导下前列腺系统穿刺术 （建议静卧床24小时，请临床注意观察术后并发症。）	前列腺增生。												“左、右前列腺穿刺”前列腺慢性炎伴萎缩及增生。免疫组化结果：免疫组化：AMACR少许弱[+]P63[+]34βE12[+]。
379	73岁	前列腺超声造影检查： 前列腺未见明显异常增强区	前列腺增生考虑；前列腺外周带完整，T2W上信号局部稍偏低，左侧局部信号欠均，弥散扫描未见明显受限，未见明显强化灶，穿刺后改变可能，请结合临床、PSA检查及随访。												“左、右前列腺穿刺”前列腺增生性病变。免疫组化结果：免疫组化：AMACR[-]P63[+]34βE12[+]。
380	56岁	前列腺超声造影检查： 前列腺双侧外腺局部呈“快进快出”高增强，建议穿刺活检，请结合PSA	前列腺结节增生。附；左侧鞘膜囊积液。												无
381	73岁	前列腺超声造影检查： 前列腺左侧外腺局部呈“略快进快出”高增强	前列腺增生表现伴外周带散在出血；外周带左前部异常信号，肿瘤性病变考虑，请结合临床及相关检查。												1.“左侧前列腺穿刺标本”前列腺腺癌，Gleason分级3+3=6分。（穿刺组织5条，肿瘤占比约40%）。1.“右侧前列腺穿刺标本”前列腺腺癌，Gleason分级3+4=7分。（穿刺组织6条，肿瘤占比60%），免疫组化结果：免疫组化：AMACR[+]P63[-]34βE12[-]S-100神经束[+]。
382	70岁	前列腺超声造影检查： 前列腺未见明显异常增强区	前列腺中央腺局部结节样强化信号，弥散扫描高信号改变，请结合临床、PSA及穿刺活检。前列腺增生伴钙化。右侧外周带条状高信号，结合临床，穿刺后出血可能。												“左、右前列腺穿刺”前列腺组织，灶性腺体增生，小灶淋巴细胞浸润。免疫组化结果：免疫组化：AMACR[-]P63[+]34βE12[+]。
383	55岁	前列腺超声造影检查： 前列腺双侧外腺局部呈“快进快出”稍高增强	左侧外周带可疑片状T2信号减低区请结合B超及穿刺。前列腺增生。												“左、右前列腺穿刺”前列腺组织，腺体增生，灶性腺腔内血性物积聚。免疫组化结果：免疫组化：AMACR[-]P63[+]34βE12[+]。
384	65岁	一、前列腺超声造影检查： 前列腺未见明显异常增强区 二、超声引导下前列腺系统穿刺术 （建议静卧床24小时，请临床注意观察术后并发症。） 手术者：孔凡雷	前列腺轻度增生伴中央腺体结节影请结合临床及其他检查。												“左前列腺穿刺”前列腺增生性病变，部分间质中性粒细胞浸润。“右前列腺穿刺”，前列腺增生性病变，间质中性粒细胞浸润伴腺腔内积脓。免疫组化结果：P63[+]34βE12[+]AMACR[-]。
385	74岁	一、前列腺超声造影检查： 前列腺右侧内腺区局部腺体呈“快进快退”高增强 二、超声引导下前列腺系统穿刺术 （建议静卧床24小时，请临床注意观察术后并发症。）	前列腺增生伴结石考虑，目前内腺少许出血可能。请结合临床及相关检查。												“右前列腺穿刺”前列腺组织，局灶小腺体密集增生，核增大，可见核仁，免疫组化提示基底细胞减少，符合高级别PIN。“左前列腺穿刺”，前列腺增生性病变。免疫组化结果：右侧：AMACR[+]P63[+]34βE12局灶[-]， 左侧：P63[+]34βE12[+]AMACR[-]。
386	66岁	前列腺超声造影检查： 前列腺左侧内腺区局部实质呈“快进快退”高增强	前列腺左侧中央腺小结节，请结合临床及其他检查。前列腺增生伴周围血管丰富。												“左、右前列腺穿刺”前列腺增生性病变。免疫组化结果：免疫组化：AMACR局灶[+]P63[+]34βE12[+]。
387	48岁	一、前列腺超声造影检查： 前列腺外腺局部呈“快进快出”高增强 二、超声引导下前列腺系统穿刺术 （建议静卧床24小时，请临床注意观察术后并发症。）	前列腺饱满伴钙化，右侧外周带异常信号结节，肿瘤性病变考虑，请结合临床及实验室检查，建议进一步穿刺活检。												“左、右前列腺穿刺”前列腺增生性病变，慢性前列腺炎。免疫组化结果：免疫组化：AMACR[-]P63[+]34βE12[+]。
388	67岁	前列腺超声造影检查： 前列腺双侧外腺局部呈“快进快出”高增强，	前列腺增生伴出血表现，前列腺外周带及双侧精囊腺异常信号，前列腺癌伴双侧精囊腺侵犯可能，请结合临床，必要时穿刺活检。												“左、右前列腺穿刺”前列腺慢性炎伴腺体增生，部分腺体扩张伴粉刺样物潴留。免疫组化结果：免疫组化：AMACR腔面弱[+]P63[+]34βE12[+]。“前列腺HOLEP术标本”前列腺良性增生性病变。
389	86岁	一、前列腺超声造影检查： 前列腺右侧外腺局部呈“快进快出”高增强 前列腺Ca首先考虑 二、超声引导下前列腺系统穿刺术 （建议静卧床24小时，请临床注意观察术后并发症。）	前列腺中央腺体及外周带异常信号灶，前列腺癌伴出血、钙化考虑，伴盆腔淋巴结转移；两侧耻骨、坐骨、髋臼及右髋关节周围肌肉转移伴出血考虑，请结合临床。前列腺增生。												1.“左侧前列腺穿刺标本”前列腺腺癌，Gleason分级4+5=9分。（穿刺组织5条，肿瘤占比约90%）。1.“右侧前列腺穿刺标本”前列腺腺癌，Gleason分级4+4=8分，可见神经束累及。（穿刺组织6条，肿瘤占比约90%），免疫组化结果：免疫组化：AMACR[+]P63[-]34βE12[-]。
390	69岁	一、前列腺超声造影检查： 前列腺未见明显异常增强区 二、超声引导下前列腺系统穿刺术 （建议静卧床24小时，请临床注意观察术后并发症。）	前列腺增生表现，左侧外周带可见结节状强化请结合临床，建议活检。												“右前列腺穿刺”前列腺慢性炎伴腺体增生，部分腺腔积脓，个别腺上皮伴异型增生（注意随访）。“左前列腺穿刺”，前列腺增生性病变。免疫组化P63[+小灶减少]34βE12[+]小灶减少AMACR小灶[+]。
391	69岁	一、前列腺增生伴结石，超声造影提示：前列腺未见明显异常增强区 二、超声引导下前列腺系统穿刺术 （建议静卧床24小时，请临床注意观察术后并发症。）	前列腺结节增生考虑，请结合临床。												“左、右前列腺穿刺”前列腺增生性病变。免疫组化结果：免疫组化：AMACR灶性[+]P63[+]34βE12[+]。
392	57岁	前列腺超声造影检查： 前列腺腺体整体呈“快进快退”高增强 检查者：孔凡雷	未做												“左前列腺穿刺”前列腺腺癌，Gleason分级3+4=7分。“右前列腺穿刺”前列腺腺癌，Gleason分级4+3=7分。免疫组化结果：AMACR[+]P63[-]34βE12[-]。
393	74岁	一、前列腺超声造影检查： 前列腺未见明显异常增强区 二、超声引导下前列腺系统穿刺术 （建议静卧床24小时，请临床注意观察术后并发症。） 手术者：王炜	前列腺增生、内腺多发增生结节考虑，请结合临床及相关检查。												1.“左侧前列腺穿刺标本”前列腺增生性病变，小灶见少数小圆形腺体异型增生，可见明显核仁，结合免疫组化结果，符合微小前列腺腺癌，镜下最大径小于1mm。1.“右侧前列腺穿刺标本”前列腺增生性病变，免疫组化结果：免疫组化：左侧小灶腺体AMACR[+]P63[-]34βE12[-]，CD34小灶梭形细胞[-]。右侧P63[+]34βE12[+]AMACR[-]。
394	59岁	一、前列腺超声造影检查： 前列腺未见明显异常增强区 二、超声引导下前列腺系统穿刺术 （建议静卧床24小时，请临床注意观察术后并发症。） 手术者：王炜	前列腺增生改变，两侧外周带T1WI序列少许片装稍高信号，右侧外周带T2WI序列信号略增高，穿刺术后改变可能，请结合临床及随访。												“左、右前列腺穿刺”前列腺增生性病变。免疫组化结果：免疫组化：AMACR[-]P63[+]34βE12[+]。
395	89岁	一、前列腺超声造影检查： 前列腺左侧外腺不均质回声结节呈“快进快出”高增强 二、超声引导下前列腺系统穿刺术 （建议静卧床24小时，请临床注意观察术后并发症。）	前列腺增生，前列腺外周带强化欠均，请结合临床，建议超声穿刺活检。												“左前列腺穿刺”前列腺腺癌，Gleason分级5+4=9分，结合免疫组化，符合伴神经束累及。右前列腺穿刺”前列腺腺癌，Gleason分级5+3=8分，免疫组化结果：AMACR少许[+]P63[-]34βE12[-]S-100神经束[+]CK[+]。
396	85岁	一、前列腺超声造影检查： 前列腺造影后正中结节呈“慢进同出”低增强 二、超声引导下前列腺系统穿刺术 （建议静卧床24小时，请临床注意观察术后并发症。）	前列腺增生表现，中央腺左侧份异常信号，肿瘤性病变待排，建议穿刺活检。												“左、右前列腺穿刺”前列腺萎缩伴增生。免疫组化结果：免疫组化：AMACR[-]P63[+]34βE12[+]。
397	73岁	一、前列腺超声造影检查： 前列腺未见明显异常增强区 二、超声引导下前列腺系统穿刺术 （建议静卧床24小时，请临床注意观察术后并发症。）	前列腺增生考虑，请结合临床及相关检查。												“左、右前列腺穿刺”前列腺增生性病变。免疫组化结果：免疫组化：AMACR[-]P63[+]34βE12[+]。
398	74岁	一、前列腺超声造影检查： 前列腺未见明显异常增强区 二、超声引导下前列腺系统穿刺术 （建议静卧床24小时，请临床注意观察术后并发症。）	前列腺增生改变，中央腺体低信号，前列腺外周带两侧异常信号灶，出血考虑，结合病史，考虑穿刺后改变可能，请结合临床。												“左、右前列腺穿刺”前列腺增生性病变。免疫组化结果：免疫组化：AMACR[-]P63[+]34βE12[+]。
399	64岁	一、前列腺超声造影检查： 前列腺右侧内腺局部呈快进快退高增强 二、超声引导下前列腺系统穿刺术 （建议静卧床24小时，请临床注意观察术后并发症。）	前列腺增大，提示前列腺增生；T1WI两侧前列腺外周带信号增高，出血？其他？请结合临床考虑。												“左、右前列腺穿刺”前列腺增生性病变，慢性前列腺炎。免疫组化结果：免疫组化：AMACR[-]P63[+]34βE12[+]。
400	84岁	一、前列腺超声造影检查： 前列腺右侧外腺结节呈“快进快出”高增强 提示：前列腺CA首先考虑 二、超声引导下前列腺系统穿刺术 （建议静卧床24小时，请临床注意观察术后并发症。） 手术者：孔凡雷	前列腺中央腺体及外周带异常信号灶，考虑前列腺肿瘤局部侵及左侧精囊腺，建议穿刺活检，请结合临床？前列腺增生。												“左前列腺穿刺”前列腺腺癌，Gleason分级4+3=7分。“右前列腺穿刺”，前列腺腺癌Gleason分级3+4=7分。免疫组化结果：AMACR[+]P63[-]34βE12[-]。
401	78岁	一、前列腺超声造影检查： 前列腺未见明显异常增强区 二、超声引导下前列腺系统穿刺术 （建议静卧床24小时，请临床注意观察术后并发症。）	前列腺增生表现，右侧外周带见类结节影，肿瘤性病变待排，请结合临床及相关检查，建议穿刺活检。												“左、右前列腺穿刺”前列腺增生性病变。免疫组化结果：免疫组化：AMACR[-]P63[+]34βE12[+]。
402	62岁	一、前列腺超声造影检查： 前列腺造影未见明显异常 二、超声引导下前列腺系统穿刺术 （建议静卧床24小时，请临床注意观察术后并发症。）	前列腺右侧中央腺内强化小结节，请结合临床及其他检查。前列腺增生表现。												“左、右前列腺穿刺”前列腺增生性病变。免疫组化结果：免疫组化：AMACR[-]P63[+]34βE12[+]。
403	69岁	一、前列腺超声造影检查： 前列腺造影未见明显异常 二、超声引导下前列腺系统穿刺术 （建议静卧床24小时，请临床注意观察术后并发症。）	前列腺增生伴钙化或结石。												“左、右前列腺穿刺”前列腺增生性病变。免疫组化结果：免疫组化：AMACR[-]P63[+]34βE12[+]。
404	71岁	前列腺超声造影检查： 双侧前列腺外腺局部呈“快进快出”高增强	前列腺增生，外周带局部小斑片状强化影，占位不除外，请结合临床及穿刺活检。												“左、右前列腺穿刺”前列腺增生性病变。免疫组化结果：免疫组化：AMACR小灶[+]P63[+]34βE12[+]。
405	53岁	一、前列腺超声造影检查： 前列腺未见明显异常增强区 二、超声引导下前列腺系统穿刺术 （建议静卧床24小时，请临床注意观察术后并发症。）	无												“左、右前列腺穿刺”前列腺增生性病变。免疫组化结果：免疫组化：AMACR[-]P63[+]34βE12[+]。
406	59岁	前列腺超声造影检查： 前列腺左侧外腺局部呈稍高增强，建议穿刺活检	前列腺增生伴钙化。												“左、右前列腺穿刺”前列腺增生性病变，局灶见慢性炎。免疫组化结果：免疫组化：AMACR[-]P63[+]34βE12[+]。
407	63岁	前列腺增生伴结石，超声造影提示：前列腺未见明显异常增强区	前列腺增生。右侧外周带前缘异常信号灶，炎性病变待排，请结合临床及相关检查。												“左、右前列腺穿刺”前列腺增生性病变。免疫组化结果：免疫组化：AMACR[-]P63[+]34βE12[+]。
408	66岁	前列腺超声造影检查： 前列腺右侧外腺局部呈“快进快出”高增强，建议穿刺活检	前列腺增生改变，请结合临床。												“左、右前列腺穿刺”前列腺增生性病变，慢性前列腺炎。免疫组化结果：免疫组化：AMACR[-]P63[+]34βE12[+]。
409	58岁	一、前列腺超声造影检查： 前列腺造影后正中结节呈慢进同退低增强	前列腺增生；中央腺左侧增生结节可能，建议相关检查或随访。												“双侧前列腺穿刺”前列腺腺癌，Gleason分级3+3=6分。免疫组化结果：AMACR[+]P63[-]34βE12[-]。
410	54岁	前列腺超声造影检查： 前列腺左侧外腺局部呈“快进快出”高增强，建议穿刺活检	前列腺轻度增生。前列腺外周带可疑低信号，部分容积效应可能。												“左、右前列腺穿刺”前列腺增生性病变。免疫组化结果：免疫组化：AMACR[-]P63[+]34βE12[+]。
411	59岁	一、前列腺超声造影检查： 前列腺右侧外腺结节呈“快进快出”高增强 二、超声引导下前列腺系统穿刺术 （建议静卧床24小时，请临床注意观察术后并发症。）	未做												“左、右前列腺穿刺”前列腺腺癌，Gleason分级3+3=6分。肿瘤成分占送检组织约5%以下。免疫组化结果：AMACR[+]P63[-]34βE12[-]。
412	63岁	一、前列腺超声造影检查： 前列腺未见明显异常增强区 二、超声引导下前列腺系统穿刺术 （建议静卧床24小时，请临床注意观察术后并发症。） 手术:陈创华	前列腺增生；前列腺右中央叶结节样强化，请结合临床及穿刺检查。												“左、右前列腺穿刺”前列腺良性增生性病变。免疫组化结果：免疫组化：AMACR灶性[+]P63[+]34βE12[+]。
413	66岁	前列腺超声造影检查： 前列腺左侧外腺结节呈“快进快出”高增强， 提示：前列腺CA待排	前列腺左侧外周带内结节状异常信号灶，肿瘤性病变不除外，请结合超声检查；前列腺增生。												“右侧前列腺穿刺”前列腺增生性病变，小灶腺体异型增生，可见大核仁，形态可符合微小前列腺腺癌，镜下最大径<1mm。（Gleason分级3+3=6分，成分少，供参考）。“左侧前列腺穿刺”前列腺增生性病变免疫组化结果：免疫组化：右侧异型腺体：AMACR[+]34βE12[-]P63片内未见异型细胞灶，无法判断。左侧P63[+]34βE12[+]AMACR[-]。
414	51岁	一、前列腺超声造影检查： 前列腺左侧外腺局部呈“快进快出”高增强，建议穿刺活检 二、超声引导下前列腺系统穿刺术 （建议静卧床24小时，请临床注意观察术后并发症。）	前列腺增生；左侧中央腺结节，增生结节可能大；左侧前列腺外周带稍短T2信号欠局部强化明显，请结合临床及相关检查，建议活检。												“左、右前列腺穿刺”前列腺萎缩伴增生。免疫组化结果：免疫组化：AMACR少许弱[+]P63[+]34βE12[+]。
415	66岁	一、前列腺超声造影检查： 前列腺左侧外腺局部呈“快进快出”高增强， 提示：前列腺CA待排 二、超声引导下前列腺系统穿刺术 （建议静卧床24小时，请临床注意观察术后并发症。）	前列腺左侧外周带异常信号，占位性病变可能大，建议穿刺进一步检查；前列腺轻度增生。												“左前列腺穿刺”前列腺腺癌，Gleason分级3+3=6分。“右前列腺穿刺”，前列腺增生性病变。免疫组化结果：左侧：AMACR[+]P63[-]34βE12[-]，右侧：P63[+]34βE12[+]AMACR[-]。
416	70岁	一、前列腺超声造影检查： 前列腺未见明显异常增强区 二、超声引导下前列腺系统穿刺术 （建议静卧床24小时，请临床注意观察术后并发症。）	前列腺轻度增生考虑，请结合临床及其他检查。												“左、右前列腺穿刺”前列腺增生性病变。免疫组化结果：免疫组化：AMACR灶性[+]P63[+]34βE12[+]。
417	90岁	前列腺超声造影检查： 前列腺右侧外腺局部呈“快进快出”高增强，建议穿刺活检	未做												“左前列腺穿刺”前列腺组织，局灶上皮增生活跃，结合免疫组化，考虑为高级别PIN。“右前列腺穿刺”前列腺腺癌，Gleason分级4+4=8分。免疫组化结果：左侧：AMACR[+]P63[+]34βE12[+]，右侧AMACR[+]P63[-]34βE12[-]。
418	57岁	前列腺增生伴结石，超声造影提示：前列腺未见明显异常增强区	前列腺增生考虑，请结合临床及其他检查。												“左、右前列腺穿刺”前列腺增生性病变。免疫组化结果：免疫组化：AMACR[-]P63[+]34βE12[+]。
419	68岁	前列腺超声造影检查： 前列腺左侧外腺结节呈“同进快出”稍高增强，建议穿刺活检 前列腺增生	前列腺增生可符，前列腺偏左后方结节需予以关注，结合临床，必要时穿刺活检。												“左、右前列腺穿刺”前列腺增生性病变。免疫组化结果：免疫组化：AMACR[-]P63[+]34βE12[+]。
420	66岁	一 前列腺增生伴结石，超声造影提示：前列腺未见明显异常增强区 二 超声引导下前列腺系统穿刺术 （建议静卧床24小时，请临床注意观察术后并发症。）	未做												“左、右前列腺穿刺”前列腺组织良性增生性病变。免疫组化结果：免疫组化：AMACR小灶弱[+]P63[+]34βE12[+]。
421	53岁	一、前列腺超声造影检查： 前列腺未见明显异常增强区 二、超声引导下前列腺系统穿刺术 （建议静卧床24小时，请临床注意观察术后并发症。）	前列腺增生，中央腺明显强化结节，建议随访复查；左下外周带可疑低信号，建议穿刺活检。												“左、右前列腺穿刺”前列腺增生性病变。免疫组化结果：免疫组化：AMACR[-]P63[+]34βE12[+]。
422	55岁	一、前列腺超声造影检查： 前列腺未见明显异常增强区 二、超声引导下前列腺系统穿刺术 （建议静卧床24小时，请临床注意观察术后并发症。）	前列腺增生伴右侧外周带强化结节灶，请结合临床必要时穿刺活检。												“左、右前列腺穿刺”前列腺增生性病变。免疫组化结果：免疫组化：AMACR[-]P63[+]34βE12[+]。
423	65岁	一、前列腺超声造影检查： 前列腺左侧外腺不均质回声结节呈“快进快出”高增强 二、超声引导下前列腺系统穿刺术 （建议静卧床24小时，请临床注意观察术后并发症。）	前列腺增生；前列腺外周围结节异常信号灶，前列腺Ca可能，建议穿刺活检。												“左前列腺穿刺”前列腺腺癌，Gleason分级4+4=8分，穿刺组织6条，肿瘤占比40%。“右前列腺穿刺”，前列腺增生性病变。免疫组化结果：左侧：AMACR[+]P63[-]34βE12[-]，右侧：P63[+]34βE12[+]AMACR[-]。
424	48岁	一、前列腺超声造影检查： 前列腺未见明显异常增强区 二、超声引导下前列腺系统穿刺术 （建议静卧床24小时，请临床注意观察术后并发症。）	前列腺增生考虑，请结合临床。												“左、右前列腺穿刺”前列腺增生性病变。免疫组化结果：免疫组化：AMACR[-]P63[+]34βE12[+]。
425	59岁	一、前列腺超声造影检查： 前列腺未见明显异常增强区 二、超声引导下前列腺系统穿刺术 （建议静卧床24小时，请临床注意观察术后并发症。）	前列腺增生伴钙化；中央腺明显增大，其内多个结节影，增生结节可能大，结合相关检查及随访。												“左、右前列腺穿刺”前列腺增生性病变。免疫组化结果：免疫组化：AMACR[-]P63[+]34βE12[+]。
426	68岁	一、前列腺超声造影检查： 前列腺双侧外腺局部呈“快进快出”高增强，建议穿刺活检 二、超声引导下前列腺系统穿刺术 （建议静卧床24小时，请临床注意观察术后并发症。）	未做												1.“左侧前列腺穿刺标本”前列腺腺癌，Gleason分级3+3=6分。（穿刺组织6条，肿瘤占比约50-30%）。1.“右侧前列腺穿刺标本”前列腺腺癌，Gleason分级3+3=6分。（穿刺组织5条，肿瘤占比约30-40%），免疫组化结果：免疫组化：AMACR[+]CK/6[-]P63[-]P40[-]34βE12[-]S100神经束[+]。
427	55岁	一、前列腺超声造影检查： 前列腺双侧外腺局部呈“快进快出”稍高增强 二、超声引导下前列腺系统穿刺术 （建议静卧床24小时，请临床注意观察术后并发症。）	左侧外周带可疑片装T2信号减低区，请结合B超及穿刺。前列腺增生。												“左前列腺穿刺”慢性前列腺炎伴腺腔积液，局灶腺体高级别上皮内瘤变（高级别PIN）。“右侧前列腺穿刺”慢性前列腺炎伴腺腔积脓及腺体增生。免疫组化结果：免疫组化：左侧AMACR[+]P63散在[+]34βE12个别[+]，右侧AMACR[-]P63[+]34βE12[+]。
428	58岁	一、前列腺超声造影检查： 前列腺外腺（右侧为主）结节呈“快进快出”高增强 提示：前列腺CA首先考虑 二、超声引导下前列腺系统穿刺术 （建议静卧床24小时，请临床注意观察术后并发症。）	前列腺右侧外周带、大部分中央腺及部分少许左侧外周带异常信号灶，前列腺Ca考虑，请对比老片及临床，相关检查；前列腺增生改变。												1.“左侧前列腺穿刺标本”前列腺腺癌，Gleason分级4+3=7分（另<5%，5分），累及神经束，肿瘤占比70%。1.“右侧前列腺穿刺标本”前列腺腺癌，Gleason分级4+4=8分。（另<5%，5分），累及神经束，肿瘤占比80%。免疫组化结果：免疫组化：AMACR[+]P63[-]34βE12[-]。
429	69岁	一、前列腺超声造影检查： 前列腺右侧外腺局部呈“快进快出”高增强 二、超声引导下前列腺系统穿刺术 （建议静卧床24小时，请临床注意观察术后并发症。）	未做												“左、右前列腺穿刺”前列腺增生性病变。免疫组化结果：免疫组化：AMACR[-]P63[+]34βE12[+]。
430	73岁	前列腺增生伴结石，超声造影提示：前列腺未见明显异常增强区 超声引导下前列腺系统穿刺术 （建议静卧床24小时，请临床注意观察术后并发症。）	上述征象，考虑前列腺增生，请结合临床。												“左、右前列腺穿刺”前列腺增生性病变。免疫组化结果：免疫组化：AMACR[-]P63[+]34βE12[+]。
431	72岁	前列腺超声造影检查： 前列腺未见明显异常增强区	未做												“左、右前列腺穿刺”前列腺萎缩增生性。免疫组化结果：免疫组化：AMACR灶区弱[+]P63[+]34βE12[+]。
432	56岁	前列腺超声造影检查： 前列腺未见明显异常增强区	前列腺增生。												“左、右前列腺穿刺”前列腺增生性病变。免疫组化结果：免疫组化：AMACR[-]P63[+]34βE12[+]。
433	69岁	一、前列腺超声造影检查： 前列腺未见明显异常增强区 二、超声引导下前列腺系统穿刺术 （建议静卧床24小时，请临床注意观察术后并发症。）	未做												“前列腺HOLEP术标本”前列腺增生性病变，免疫组化P63[+]34βE12[+]AMACR[-]。
434	71岁	一、前列腺超声造影检查： 前列腺未见明显异常增强区 二、超声引导下前列腺系统穿刺术 （建议静卧床24小时，请临床注意观察术后并发症。）	前列腺左侧外周带可疑异常信号灶，请结合临床，建议随访。前列腺增生。												1.“左侧前列腺穿刺标本”前列腺腺癌，Gleason分级3+3=6分。（穿刺组织6条，肿瘤占比约5-10%）。1.“右侧前列腺穿刺标本”前列腺腺癌，Gleason分级3+3=6分。（穿刺组织5条，肿瘤占比约5-10%），免疫组化结果：免疫组化：AMACR[+]P63[-]34βE12[-]。
435	66岁	一、前列腺超声造影检查： 前列腺造影未见明显异常 二、超声引导下前列腺系统穿刺术 （建议静卧床24小时，请临床注意观察术后并发症。）	前列腺占位，建议穿刺。												“左、右前列腺穿刺”前列腺增生性病变。免疫组化结果：免疫组化：AMACR[-]P63[+]34βE12[+]。
436	63岁	一、前列腺超声造影检查： 前列腺右侧外腺低回声区超声造影呈低增强 二、超声引导下前列腺系统穿刺术 （建议静卧床24小时，请临床注意观察术后并发症。）	前列腺内腺右侧及外腺区左侧异常信号影，请结合临床及其他检查。前列腺增生表现。												“左、右前列腺穿刺”前列腺增生性病变。免疫组化结果：免疫组化：AMACR[-]P63[+]34βE12[+]。
437	72岁	一、前列腺超声造影检查： 前列腺造影未见明显异常 二、超声引导下前列腺系统穿刺术 （建议静卧床24小时，请临床注意观察术后并发症。）	前列腺增生，中央腺左侧份异常信号结节，肿瘤性病变待排，建议穿刺检查。												“左、右前列腺穿刺”前列腺增生性病变。免疫组化结果：免疫组化：AMACR[-]P63[+]34βE12[+]。
438	78岁	一、前列腺超声造影检查： 前列腺右侧外腺不均质回声区及内外腺交界处结节呈“快进快出”高增强 二、超声引导下前列腺系统穿刺术 （建议静卧床24小时，请临床注意观察术后并发症。）	前列腺外周带右后部异常信号，考虑肿瘤性病变可能，建议穿刺活检；前列腺增生。												“右前列腺穿刺”前列腺腺癌，Gleason分级4+4=8分，侵犯神经束，穿刺组织6条，肿瘤占比70%。“左前列腺穿刺”，慢性前列腺炎，局灶中性粒细胞浸润。免疫组化结果：右侧：AMACR[+]P63[-]34βE12[-]S100神经束[+]，左侧：P63[+]34βE12[+]AMACR[-]。
439	70岁	一、前列腺超声造影检查： 前列腺未见明显异常增强区 二、超声引导下前列腺系统穿刺术 （建议静卧床24小时，请临床注意观察术后并发症。） 手术者：陈创华	前列腺增生改变，请结合临床。												“左前列腺穿刺”前列腺腺癌，Gleason分级3+3=6分，穿刺组织6条，肿瘤占比10%。“右前列腺穿刺”，前列腺腺癌，Gleason分级3+3=6分，穿刺组织6条，肿瘤占比10%。免疫组化结果：AMACR[+]P63[-]34βE12[-]S100神经束[+]。
440	66岁	一、前列腺超声造影检查： 前列腺未见明显异常增强区 二、超声引导下前列腺系统穿刺术 （建议静卧床24小时，请临床注意观察术后并发症。）	前列腺中央腺右侧份信号异常，肿瘤性病变不能排除，建议穿刺活检；前列腺增生，后部射精管囊肿可能。												“右前列腺穿刺”前列腺腺癌，Gleason分级3+3=6分，前列腺穿刺组织5条，肿瘤成分占比5-10%。“左前列腺穿刺”，前列腺增生性病变，间质淋巴细胞灶状浸润。免疫组化结果：右侧：小区AMACR[+]P63[-]34βE12[-]，左侧P63[+]34βE12[+]AMACR[-]。
441	87岁	一、前列腺超声造影检查： 前列腺未见明显异常增强区 二、超声引导下前列腺系统穿刺术 （建议静卧床24小时，请临床注意观察术后并发症。）	未做												“左前列腺穿刺”前列腺腺癌，Gleason分级3+3=6分，穿刺组织6条，肿瘤占比20%。“右前列腺穿刺”，前列腺腺癌，Gleason分级4+4=8分，穿刺组织5条，肿瘤占比10%。免疫组化结果：AMACR[+]P63[-]34βE12[-]。
442	69岁	一、前列腺超声造影检查： 前列腺外腺局部呈“快进快出”高增强 二、超声引导下前列腺系统穿刺术 （建议静卧床24小时，请临床注意观察术后并发症。）	前列腺增生；右侧外周带结节灶，前列腺癌可能，请结合临床。												“左前列腺穿刺”前列腺腺癌，Gleason分级3+3=6分，穿刺组织4条，肿瘤占比30%。“右前列腺穿刺”，前列腺腺癌，Gleason分级4+3=7分，穿刺组织6条，肿瘤占比80-90%，可见神经束累犯。免疫组化结果：AMACR[+]P63[-]34βE12[-]S100神经束[+]。
443	77岁	一、前列腺超声造影检查： 前列腺未见明显异常增强区 二、超声引导下前列腺系统穿刺术 （建议静卧床24小时，请临床注意观察术后并发症。）	前列腺增生；前列腺中央腺体左侧异常信号灶，请结合临床及必要时穿刺活检。												“左、右前列腺穿刺”前列腺增生性病变。免疫组化结果：免疫组化：AMACR[-]P63[+]34βE12[+]。
444	84岁	前列腺超声造影检查： 前列腺未见明显异常增强区	左侧外周带可疑结节灶，肿瘤性病变待排，建议进一步穿刺检查。前列腺增生。												“左前列腺穿刺”前列腺腺癌，Gleason分级3+4=7分。“右前列腺穿刺”前列腺腺癌，Gleason分级4+3=7分。免疫组化结果：AMACR[+]P63[-]34βE12[-]。
445	47岁	一、前列腺超声造影检查： 前列腺外腺局部呈“快进快出”高增强 二、超声引导下前列腺系统穿刺术 （建议静卧床24小时，请临床注意观察术后并发症。）	上述表现，前列腺癌并膀胱、双侧精囊腺侵犯，左侧盆壁及髂血管旁淋巴结转移考虑，双侧腹股沟区多发肿大淋巴结，请结合临床相关检查。												“左、右前列腺穿刺”前列腺腺癌，Gleason评分4+5=9分。免疫组化结果：免疫组化：AMACR[+]P63[-]34βE12[-]。
446	56岁	一、前列腺超声造影检查： 前列腺未见明显异常增强区 二、超声引导下前列腺系统穿刺术 （建议静卧床24小时，请临床注意观察术后并发症。）	前列腺增生，中央腺右侧一结节ADC信号减低，请结合临床、实验室检查，建议随访，必要时穿刺活检。												“左、右前列腺穿刺”前列腺增生性病变。免疫组化结果：免疫组化：AMACR[-]P63[+]34βE12[+]。
447	87岁	一、前列腺超声造影检查： 前列腺未见明显异常增强区	前列腺增生。前列腺中央腺体及外周带右侧异常信号灶，建议穿刺活检。两侧腹股沟多发稍大淋巴结显示，请结合临床。												“左前列腺穿刺”前列腺腺癌，Gleason分级4+4=8分，穿刺组织5条，肿瘤占比60%。“右前列腺穿刺”，前列腺腺癌，Gleason分级4+4=8分，穿刺组织5条，肿瘤占比70%。
448	65岁	一、前列腺超声造影检查： 前列腺未见明显异常增强区	前列腺增生；中央腺上缘结节灶，肿瘤可能，请结合临床。												“左、右前列腺穿刺”前列腺腺癌，Gleason评分3+4=7分。免疫组化结果：免疫组化：AMACR[+]34βE12[-]S100[-]。
449	72岁	一、前列腺超声造影检查： 前列腺外腺局部呈“快进同出”高增强 二、超声引导下前列腺系统穿刺术 （建议静卧床24小时，请临床注意观察术后并发症。）	前列腺增生，右侧外周带可疑信号影，建议穿刺活检。												“左、右前列腺穿刺”前列腺增生性病变伴间质内淋巴细胞、组织细胞反应。免疫组化结果：免疫组化：AMACR[-]P63[+]34βE12[+]。
450	75岁	一、前列腺超声造影检查： 前列腺外腺局部呈“快进快出”高增强	未做												“左、右前列腺穿刺”前列腺腺癌，Gleason评分4+4=8分。免疫组化结果：免疫组化：AMACR[+]34βE12[-]S100[-]。
451	66岁	一、前列腺超声造影检查： 前列腺未见明显异常增强区	前列腺增生，中央腺体内斑片状短T1长T2信号影，出血考虑，请结合临床。												“左前列腺穿刺”前列腺腺癌，Gleason分级4+3=7分。“右前列腺穿刺”，前列腺增生性病变伴小灶腺上皮细胞可见核仁，考虑高级别上皮内病变（HPIN）。免疫组化结果：左侧：AMACR[+]P63[-]34βE12[-]，右侧：P63[+]34βE12[+]小灶弱AMACR[+]。
452	59岁	一、前列腺超声造影检查： 前列腺增生伴结石，超声造影提示：前列腺未见明显异常增强区 二、超声引导下前列腺系统穿刺术 （建议静卧床24小时，请临床注意观察术后并发症。）	前列腺增生伴多发钙化。												“左、右前列腺穿刺”前列腺增生性病变，局灶见慢性炎。免疫组化结果：免疫组化：AMACR[-]P63[+]34βE12[+]。
453	79岁	一、前列腺超声造影检查： 前列腺右侧内外腺交界处结节呈“快进快出”高增强，建议穿刺活检 二、超声引导下前列腺系统穿刺术 （建议静卧床24小时，请临床注意观察术后并发症。）	前列腺增生。												“左、右前列腺穿刺”前列腺增生性病变。免疫组化结果：免疫组化：AMACR[-]P63[+]34βE12[+]。
454	63岁	一、前列腺超声造影检查： 前列腺未见明显异常增强区 二、超声引导下前列腺系统穿刺术 （建议静卧床24小时，请临床注意观察术后并发症。）	前列腺增生改变，肿瘤性病变不除外，请结合临床，建议穿刺活检观察。												“左前列腺穿刺”前列腺慢性炎，小灶积脓。“右前列腺穿刺”，前列腺增生性病变。免疫组化结果：左侧：AMACR[-]P63[+]34βE12[+]，右侧：P63[+]34βE12[+]AMACR[-]。
455	71岁	一、前列腺超声造影检查： 前列腺未见明显异常增强区 二、超声引导下前列腺系统穿刺术 （建议静卧床24小时，请临床注意观察术后并发症。）	前列腺增生改变，前列腺右后方小结节，肿瘤性病变待排，请结合临床相关检查，必要时穿刺活检。右侧精囊腺局部信号减低，腺体壁显示模糊，炎症考虑。												“前列腺HOLEP术标本”破碎组织，符合前列腺良性增生性病变，免疫组化P63[+]局灶减弱34βE12[+]AMACR[-]。
456	76岁	前列腺增生伴结石，超声造影提示：前列腺未见明显异常增强区	前列腺增生。												“右前列腺穿刺”前列腺慢性炎伴增生，可见个别（1个腺体）腺体活跃增生，核仁不明显，但免疫组化未显示基底细胞。数量少，密切随访。“左前列腺穿刺”，前列腺慢性炎伴增生性。免疫组化结果：右侧：AMACR[-]/个别腺体[+]P63[+]/个别腺体[-]34βE12[+]/个别腺体[-]，左侧：P63[+]34βE12[+]AMACR[-]。
457	77岁	一、前列腺超声造影检查： 前列腺未见明显异常增强区 二、超声引导下前列腺系统穿刺术 （建议静卧床24小时，请临床注意观察术后并发症。）	前列腺增生，伴钙化可能。												“左、右前列腺穿刺”前列腺增生性病变。免疫组化结果：免疫组化：AMACR[-]P63[+]34βE12[+]。
458	52岁	前列腺增生伴结石，超声造影提示：前列腺未见明显异常增强区	前列腺增生表现，请结合临床及实验室检查。												“前列腺剜除标本”破碎组织，符合前列腺良性增生性病变。
459	67岁	一、前列腺超声造影检查： 前列腺右侧外腺不均质回声区呈“快进快出”高增强 二、超声引导下前列腺系统穿刺术 （建议静卧床24小时，请临床注意观察术后并发症。）	前列腺增生，外周带右侧份信号异常请结合临床及病理结果。												“左前列腺穿刺”前列腺腺癌，Gleason分级4+5=9分，穿刺组织5条，肿瘤占比60-70%。“右前列腺穿刺”，前列腺腺癌，Gleason级4+5=9分，穿刺组织6条，肿瘤占比80%，累及腺神经束。免疫组化结果：双侧肿瘤成分AMACR[+]P63[-]34βE12[-]S100显示肿瘤侵犯神经束。
460	72岁	一、前列腺超声造影检查： 前列腺右侧外腺局部呈“快进快出”高增强 二、 超声引导下前列腺系统穿刺术 （建议静卧床24小时，请临床注意观察术后并发症。）	前列腺增生改变，前列腺右侧外周带小结节，肿瘤病变待排，请结合临床并穿刺活检。												“左、右前列腺穿刺”前列腺增生性病变。免疫组化结果：免疫组化：AMACR[-]P63[+]34βE12[+]。
461	58岁	一、前列腺超声造影检查： 前列腺未见明显异常增强区 二、超声引导下前列腺系统穿刺术 （建议静卧床24小时，请临床注意观察术后并发症。）	前列腺增生伴多发结石。射精管囊肿考虑，请结合临床。												“左、右前列腺穿刺”前列腺增生性病变。免疫组化结果：免疫组化：AMACR[-]P63[+]34βE12[+]。
462	77岁	一、前列腺超声造影检查： 前列腺造影未见明显异常 二、超声引导下前列腺系统穿刺术 （建议静卧床24小时，请临床注意观察术后并发症。）	前列腺增生；左侧左侧中央腺内结节灶，良性增生结节考虑，需随访关注。												“左前列腺穿刺”前列腺腺癌，Gleason分级4+3=7分。“右前列腺穿刺”，结合免疫组化结果，符合前列腺增生性病变伴小灶高级别上皮内病变（HPIN）。免疫组化结果：左侧：AMACR[+]P63[-]34βE12[-]，右侧：P63[+]34βE12[+]灶区AMACR[+]。
463	68岁	一、前列腺超声造影检查： 前列腺未见明显异常增强区 二、超声引导下前列腺系统穿刺术 （建议静卧床24小时，请临床注意观察术后并发症。）	前列腺增生伴钙化可能。前列腺中央腺结节样异常信号影，肿瘤性病变待排，请结合相关检查，必要时穿刺活检。												“左、右前列腺穿刺”前列腺增生性病变。免疫组化结果：免疫组化：AMACR小灶[+]P63[+]34βE12[+]。
464	67岁	前列腺超声造影检查： 前列腺双侧外腺局部呈“快进快出”高增强，建议穿刺活检	未做												“左、右前列腺穿刺”前列腺腺癌，Gleason评分5+5=10分，累及神经束。免疫组化结果：免疫组化：AMACR[+]P63[-]34βE12[-]S-100神经束[+]。
465	80岁	前列腺超声造影检查： 前列腺左侧外腺结节呈轻度增强，建议穿刺活检	前列腺增生可符；左侧外周带小结节状异常信号影，占位不除外，建议进一步相关检查。												“左、右前列腺穿刺”前列腺慢性炎伴增生。免疫组化结果：免疫组化：腔面弱AMACR[+]P63[+]34βE12[+]。
466	60岁	一、前列腺超声造影检查： 前列腺左侧外腺不均质回声结节呈“快进快出”高增强 二、超声引导下前列腺系统穿刺术 （建议静卧床24小时，请临床注意观察术后并发症。）	前列腺左侧外周带信号异常，占位性病变待排，请结合临床，建议穿刺活检；前列腺增生伴钙化。												“左前列腺穿刺”前列腺腺癌，Gleason分级4+3=7分。“右前列腺穿刺”，免疫组化支持前列腺增生性病变伴局灶高级别上皮内病变（HPIN）。免疫组化结果：左侧：AMACR[+]P63[-]34βE12[-]，右侧：P63[+]34βE12[+]局灶AMACR[+]。
467	70岁	一、前列腺超声造影检查： 前列腺未见明显异常增强区 二、超声引导下前列腺系统穿刺术 （建议静卧床24小时，请临床注意观察术后并发症。）	右侧外周带下部可疑异常信号伴该区域强化明显，请结合临床及穿刺活检；前列腺增生伴结石。												“右前列腺穿刺”条索状前列腺组织，小灶非典型小腺泡增生。“左前列腺穿刺”条索状前列腺组织，呈增生性改变。免疫组化结果：右侧：AMACR小区[+]P63[-]34βE12[-]，左侧P63[+]34βE12[+]AMACR小区弱[+]。
468	70岁	一、前列腺超声造影检查： 前列腺右侧内腺结节呈“快进快出”高增强 二、超声引导下前列腺系统穿刺术 （建议静卧床24小时，请临床注意观察术后并发症。）	前列腺增生；左侧中央腺内类结节异常信号灶，钙化可能，建议随访或穿刺检查。												“左、右前列腺穿刺”前列腺增生性病变。免疫组化结果：免疫组化：AMACR[-]P63[+]34βE12[+]。
469	72岁	一、前列腺超声造影检查： 前列腺左侧外腺局部呈“快进快出”高增强，建议穿刺活检 二、超声引导下前列腺系统穿刺术 （建议静卧床24小时，请临床注意观察术后并发症。）	前列腺增生，右侧中央腺体内类圆形信号影，良性病变可能大，建议定期随访或穿刺检查。												“左、右前列腺穿刺”前列腺增生性病变。免疫组化结果：免疫组化：AMACR[-]P63[+]34βE12[+]。
470	61岁	一、前列腺超声造影检查： 前列腺未见明显异常增强区 二、超声引导下前列腺系统穿刺术 （建议静卧床24小时，请临床注意观察术后并发症。）	前列腺增生改变，左侧前列腺外周带可疑结节影，肿瘤待排，请结合临床，建议穿刺活检。												“左前列腺穿刺”前列腺腺癌，Gleason分级4+3=7分。“右前列腺穿刺”，前列腺良性增生性病变。免疫组化结果：左侧：AMACR[+]P63[-]34βE12[-]，右侧：P63[+]34βE12[+]AMACR[-]。
471	77岁	一、前列腺超声造影检查： 前列腺左侧外腺局部呈“快进快出”高增强 二、超声引导下前列腺系统穿刺术 （建议静卧床24小时，请临床注意观察术后并发症。）	前列腺增生，右侧中央腺一异常强化结节，建议穿刺活检。												“右前列腺穿刺”前列腺腺癌，Gleason分级3+3=6分。“左前列腺穿刺”，前列腺良性增生性病变。免疫组化结果：右侧：AMACR[+]P63[-]34βE12[-]，左侧：P63[+]34βE12[+]AMACR[-]。
472	57岁	前列腺超声造影检查： 前列腺未见明显异常增强区	前列腺增生改变；中央腺左侧份异常信号结节灶，请结合临床及实验室检查，必要时穿刺活检。												“左、右前列腺穿刺”前列腺增生性病变。免疫组化结果：免疫组化：AMACR[-]P63[+]34βE12[+]。
473	51岁	一、前列腺超声造影检查： 前列腺左侧外腺局部呈“快进快出”高增强 二、MR联合超声虚拟导航引导下前列腺系统穿刺术 （建议静卧床24小时，请临床注意观察术后并发症。）	前列腺两侧后外带可疑信号异常，建议穿刺进一步检查。												“左、右前列腺穿刺”前列腺增生性病变。免疫组化结果：免疫组化：AMACR[-]P63[+]34βE12[+]。
474	65岁	一、前列腺超声造影检查： 前列腺未见明显异常增强区 二、超声引导下前列腺系统穿刺术 （建议静卧床24小时，请临床注意观察术后并发症。）	前列腺增生。												“左、右前列腺穿刺”前列腺组织，局灶见小团腺体，腺上皮细胞增大伴异型，核仁可见，免疫组化提示肌上皮显著减少或消失，考虑为不典型小腺体。免疫组化：左右侧P63局灶[-]34βE12局灶[-]AMACR[-]。
475	73岁	一、前列腺超声造影检查： 前列腺外腺呈“快进快退”不均匀高增强，提示：前列腺CA待排，累及膀胱及精囊腺考虑 二、超声引导下前列腺系统穿刺术	上述征象考虑前列腺癌伴精囊腺及膀胱侵犯，盆壁淋巴结转移，请结合临床及其他检查。												“左前列腺穿刺”前列腺腺癌，Gleason分级5+4=9分，穿刺组织5条，肿瘤占比90%。“右前列腺穿刺”，前列腺腺癌，Gleason级5+4=9分，穿刺组织5条，肿瘤占比80-90%。免疫组化结果：AMACR[+]P63[+]34βE12[-]S100显示神经累犯。
476	63岁	一、前列腺超声造影检查： 前列腺未见明显异常增强区 二、超声引导下前列腺系统穿刺术 （建议静卧床24小时，请临床注意观察术后并发症。）	前列腺增生；前列腺右侧叶异常信号结节灶；射精管小囊肿可能；膀胱癌增厚；请结合临床及其他检查。												“左、右前列腺穿刺”前列腺增生性病变。免疫组化结果：免疫组化：AMACR[-]P63[+]34βE12[+]。
477	77岁	一、前列腺超声造影检查： 前列腺未见明显异常增强区 二、超声引导下前列腺系统穿刺术 （建议静卧床24小时，请临床注意观察术后并发症。）	前列腺增生表现，请结合临床相关检查，必要时穿刺活检。												“左、右前列腺穿刺”前列腺增生性病变。免疫组化结果：免疫组化：AMACR[-]P63[+]34βE12[+]。
478	70岁	一、前列腺超声造影检查： 前列腺未见明显异常增强区 二、超声引导下前列腺系统穿刺术 （建议静卧床24小时，请临床注意观察术后并发症。） 手术者：王炜	前列腺肿大，提示增生存在，请结合临床考虑。												“右侧前列腺穿刺”条状前列腺组织，内散在多灶高级别PIN，免疫组化提示个别腺体基底细胞缺失，难以排除癌可能。“左侧前列腺穿刺”条状前列腺组织，小灶腺体增生。免疫组化结果：右侧P63[+]、个别[-]34βE12[+]、个别[-]AMACR灶性[+]。
479	63岁	一、前列腺超声造影检查： 前列腺未见明显异常增强区 二、超声引导下前列腺系统穿刺术 （建议静卧床24小时，请临床注意观察术后并发症。）	未做												“左、右前列腺穿刺”前列腺增生性病变。免疫组化结果：免疫组化：AMACR[-]P63[+]34βE12[+]。
480	67岁	一、前列腺超声造影检查： 前列腺左侧外腺区结节呈“快进快出”稍高增强 二、超声引导下前列腺系统穿刺术 （建议静卧床24小时，请临床注意观察术后并发症。） 手术者：陈创华	前列腺增大，提示前列腺增生；左侧外周带占位，肿瘤性病变待排，建议穿刺活检。												1.“左侧前列腺穿刺标本”前列腺腺癌，Gleason分级3+3=6分。（穿刺组织9条，肿瘤占比约2%），肉芽肿性炎。1.“右侧前列腺穿刺标本”前列腺腺癌，Gleason分级3+3=6分。（穿刺组织4条，肿瘤占比约5%），周围可见高级别上皮内瘤变（HPIN）。免疫组化结果：免疫组化：腺癌AMACR[+]P63[-]34βE12[-]；HPIN：AMACR[+]P63、34βE12减少。。
